# Supplementary material for: Noonindoles A–F: Rare Indole Diterpene Amino Acid Conjugates from a Marine-Derived Fungus, Aspergillus noonimiae CMB-M0339
Source: MDPI journal article supplement (doi:10.3390/md20110698), 2022-11-07
Supplement: s1 [file s1]

## Supporting Information

**Noonindoles A–F: Rare indole diterpene amino acid conjugates from a marine-derived fungus, *Aspergillus noonimiae* CMB-M0339**

Sarani Kankanamge<sup>1</sup>, Zeinab G. Khalil<sup>2</sup>, Paul V. Bernhardt<sup>3</sup> and Robert J. Capon<sup>2,\*</sup>

<sup>1</sup>Institute for Molecular Bioscience, The University of Queensland, Brisbane, QLD 4072,  
Australia

<sup>3</sup>School of Chemistry and Molecular Bioscience, The University of Queensland, Brisbane,  
QLD 4072, Australia

\*Corresponding author: r.capon@uq.edu.au

## List of contents

|    |                                                                          |    |
|----|--------------------------------------------------------------------------|----|
| 1  | Phylogenetic tree.....                                                   | 8  |
| 2  | Chemical investigation of CMB-M0339 .....                                | 9  |
| 3  | MATRIX cultivation profiling of CMB-M0339.....                           | 9  |
| 4  | Noonindole A ( <b>5</b> ).....                                           | 13 |
| 5  | Noonindole B ( <b>6</b> ) .....                                          | 18 |
| 6  | Noonindole C ( <b>7</b> ) .....                                          | 23 |
| 7  | Noonindole D ( <b>8</b> ).....                                           | 28 |
| 8  | Noonindole E ( <b>9</b> ).....                                           | 33 |
| 9  | Noonindole F ( <b>10</b> ).....                                          | 38 |
| 10 | Paspaline ( <b>11</b> ).....                                             | 43 |
| 11 | Paspaline B ( <b>12</b> ).....                                           | 47 |
| 12 | 12-demethylpaspaline-12-carboxylic acid ( <b>13</b> ) .....              | 51 |
| 13 | Emindole SB ( <b>14</b> ) .....                                          | 55 |
| 14 | MS/MS fragmentation patterns of <b>5 - 9</b> and <b>i-v</b> .....        | 60 |
| 15 | Crystal data and structure refinement for noonindole A ( <b>5</b> )..... | 68 |
| 16 | Biological activity of <b>5-14</b> .....                                 | 72 |
| 17 | References.....                                                          | 72 |

## List of figures

|                                                                                                                         |    |
|-------------------------------------------------------------------------------------------------------------------------|----|
| Figure S1. ITS gene sequence of CMB-M0339.....                                                                          | 6  |
| Figure S2. NCBI-BLAST search of 18S rRNA sequence of CMB-M0339 .....                                                    | 6  |
| Figure S3. Blast search (closest match) for CMB-M0339 .....                                                             | 7  |
| Figure S4. Phylogenetic tree .....                                                                                      | 8  |
| Figure S5. CMB-M0339 cultivated on SD agar .....                                                                        | 8  |
| Figure S6. UPLD-DAD chromatograms of crude extract of CMB-M0339 .....                                                   | 9  |
| Figure S7. CMB-M0339 cultivated under MATRIX conditions.....                                                            | 9  |
| Figure S8. UPLC-DAD chromatograms of MATRIX extracts of CMB-M0339 .....                                                 | 10 |
| Figure S9. Isolation scheme for <b>5-14</b> from CMB-M0339 .....                                                        | 12 |
| Figure S10. <sup>1</sup> H NMR (600 MHz, methanol- <i>d</i> <sub>4</sub> ) spectrum of noonindole A ( <b>5</b> ).....   | 14 |
| Figure S11. <sup>13</sup> C NMR (150 MHz, methanol- <i>d</i> <sub>4</sub> ) spectrum of noonindole A ( <b>5</b> ) ..... | 14 |
| Figure S12. HSQC (methanol- <i>d</i> <sub>4</sub> ) spectrum of noonindole A ( <b>5</b> ) .....                         | 15 |
| Figure S13. COSY (methanol- <i>d</i> <sub>4</sub> ) spectrum of noonindole A ( <b>5</b> ) .....                         | 15 |
| Figure S14. HMBC (methanol- <i>d</i> <sub>4</sub> ) spectrum of noonindole A ( <b>5</b> ) .....                         | 16 |
| Figure S15. ROESY (methanol- <i>d</i> <sub>4</sub> ) spectrum of noonindole A ( <b>5</b> ).....                         | 16 |
| Figure S16. HRMS spectrum of noonindole A ( <b>5</b> ).....                                                             | 17 |
| Figure S17. <sup>1</sup> H NMR (600 MHz, methanol- <i>d</i> <sub>4</sub> ) spectrum of noonindole B ( <b>6</b> ).....   | 19 |
| Figure S18. <sup>13</sup> C NMR (150 MHz, methanol- <i>d</i> <sub>4</sub> ) spectrum of noonindole B ( <b>6</b> ).....  | 19 |
| Figure S19. HSQC (methanol- <i>d</i> <sub>4</sub> ) spectrum of noonindole B ( <b>6</b> ).....                          | 20 |
| Figure S20. COSY (methanol- <i>d</i> <sub>4</sub> ) spectrum of noonindole B ( <b>6</b> ).....                          | 20 |
| Figure S21. HMBC (methanol- <i>d</i> <sub>4</sub> ) spectrum of noonindole B ( <b>6</b> ).....                          | 21 |
| Figure S22. ROESY (methanol- <i>d</i> <sub>4</sub> ) spectrum of noonindole B ( <b>6</b> ) .....                        | 21 |
| Figure S23. HRMS spectrum of noonindole B ( <b>6</b> ) .....                                                            | 22 |
| Figure S24. <sup>1</sup> H NMR (600 MHz, methanol- <i>d</i> <sub>4</sub> ) spectrum of noonindole C ( <b>7</b> ).....   | 24 |
| Figure S25. <sup>13</sup> C NMR (150 MHz, methanol- <i>d</i> <sub>4</sub> ) spectrum of noonindole C ( <b>7</b> ).....  | 24 |
| Figure S26. HSQC (methanol- <i>d</i> <sub>4</sub> ) spectrum of noonindole C ( <b>7</b> ).....                          | 25 |
| Figure S27. COSY (methanol- <i>d</i> <sub>4</sub> ) spectrum of noonindole C ( <b>7</b> ).....                          | 25 |
| Figure S28. HMBC (methanol- <i>d</i> <sub>4</sub> ) spectrum of noonindole C ( <b>7</b> ).....                          | 26 |
| Figure S29. ROESY (methanol- <i>d</i> <sub>4</sub> ) spectrum of noonindole C ( <b>7</b> ) .....                        | 26 |
| Figure S30. HRMS spectrum of noonindole C ( <b>7</b> ) .....                                                            | 27 |
| Figure S31. <sup>1</sup> H NMR (methanol- <i>d</i> <sub>4</sub> ) spectrum of noonindole D ( <b>8</b> ).....            | 29 |
| Figure S32. HSQC (methanol- <i>d</i> <sub>4</sub> ) spectrum of noonindole D ( <b>8</b> ) .....                         | 30 |
| Figure S33. COSY (methanol- <i>d</i> <sub>4</sub> ) spectrum of noonindole D ( <b>8</b> ) .....                         | 30 |
| Figure S34. HMBC (methanol- <i>d</i> <sub>4</sub> ) spectrum of noonindole D ( <b>8</b> ) .....                         | 31 |
| Figure S35. ROESY (methanol- <i>d</i> <sub>4</sub> ) spectrum of noonindole D ( <b>8</b> ).....                         | 31 |
| Figure S36. HRMS spectrum of noonindole D ( <b>8</b> ) .....                                                            | 32 |
| Figure S37. <sup>1</sup> H NMR (methanol- <i>d</i> <sub>4</sub> ) spectrum of noonindole E ( <b>9</b> ) .....           | 34 |
| Figure S38. HSQC (methanol- <i>d</i> <sub>4</sub> ) spectrum of noonindole E ( <b>9</b> ).....                          | 35 |
| Figure S39. COSY (methanol- <i>d</i> <sub>4</sub> ) spectrum of noonindole E ( <b>9</b> ).....                          | 35 |
| Figure S40. HMBC (methanol- <i>d</i> <sub>4</sub> ) spectrum of noonindole E ( <b>9</b> ).....                          | 36 |
| Figure S41. ROESY (methanol- <i>d</i> <sub>4</sub> ) spectrum of noonindole E ( <b>9</b> ) .....                        | 36 |
| Figure S42. HRMS spectrum of noonindole E ( <b>9</b> ) .....                                                            | 37 |
| Figure S43. <sup>1</sup> H NMR (methanol- <i>d</i> <sub>4</sub> ) spectrum of noonindole F ( <b>10</b> ) .....          | 39 |
| Figure S44. <sup>13</sup> C NMR (methanol- <i>d</i> <sub>4</sub> ) spectrum of noonindole F ( <b>10</b> ) .....         | 39 |
| Figure S45. HSQC (methanol- <i>d</i> <sub>4</sub> ) spectrum of compound noonindole F ( <b>10</b> ) .....               | 40 |
| Figure S46. COSY (methanol- <i>d</i> <sub>4</sub> ) spectrum of compound noonindole F ( <b>10</b> ) .....               | 40 |
| Figure S47. HMBC (methanol- <i>d</i> <sub>4</sub> ) spectrum of compound noonindole F ( <b>10</b> ).....                | 41 |
| Figure S48. ROESY (methanol- <i>d</i> <sub>4</sub> ) spectrum of compound noonindole F ( <b>10</b> ).....               | 41 |
| Figure S49. HRMS spectrum of noonindole F ( <b>10</b> ).....                                                            | 42 |

|                                                                                                                                          |    |
|------------------------------------------------------------------------------------------------------------------------------------------|----|
| Figure S50. <sup>1</sup> H NMR (DMSO- <i>d</i> <sub>6</sub> ) spectrum of paspaline ( <b>11</b> ).....                                   | 44 |
| Figure S51. HSQC (DMSO- <i>d</i> <sub>6</sub> ) spectrum of paspaline ( <b>11</b> ).....                                                 | 44 |
| Figure S52. COSY (DMSO- <i>d</i> <sub>6</sub> ) spectrum of paspaline ( <b>11</b> ).....                                                 | 45 |
| Figure S53. HMBC (DMSO- <i>d</i> <sub>6</sub> ) spectrum of paspaline ( <b>11</b> ) .....                                                | 45 |
| Figure S54. HRMS spectrum of paspaline ( <b>11</b> ).....                                                                                | 46 |
| Figure S55. <sup>1</sup> H NMR (CDCl <sub>3</sub> ) spectrum of paspaline B ( <b>12</b> ).....                                           | 48 |
| Figure S56. HSQC (CDCl <sub>3</sub> ) spectrum of paspaline B ( <b>12</b> ) .....                                                        | 48 |
| Figure S57. COSY (CDCl <sub>3</sub> ) spectrum of paspaline B ( <b>12</b> ) .....                                                        | 49 |
| Figure S58. HMBC (CDCl <sub>3</sub> ) spectrum of paspaline B ( <b>12</b> ) .....                                                        | 49 |
| Figure S59. HRMS spectrum of paspaline B ( <b>12</b> ) .....                                                                             | 50 |
| Figure S60. <sup>1</sup> H NMR (DMSO- <i>d</i> <sub>6</sub> ) spectrum of 12-demethylpaspaline-12-carboxylic acid ( <b>13</b> )<br>..... | 52 |
| Figure S61. HSQC (DMSO- <i>d</i> <sub>6</sub> ) spectrum of 12-demethylpaspaline-12-carboxylic acid ( <b>13</b> )                        | 52 |
| Figure S62. COSY (DMSO- <i>d</i> <sub>6</sub> ) spectrum of 12-demethylpaspaline-12-carboxylic acid ( <b>13</b> )                        | 53 |
| Figure S63. HMBC (DMSO- <i>d</i> <sub>6</sub> ) spectrum of 12-demethylpaspaline-12-carboxylic acid ( <b>13</b> )<br>.....               | 53 |
| Figure S64. HRMS spectrum of 12-demethylpaspaline-12-carboxylic acid ( <b>13</b> ) .....                                                 | 54 |
| Figure S65. <sup>1</sup> H NMR (DMSO- <i>d</i> <sub>6</sub> ) spectrum of emindole SB ( <b>14</b> ) .....                                | 56 |
| Figure S66. HSQC (DMSO- <i>d</i> <sub>6</sub> ) spectrum of emindole SB ( <b>14</b> ).....                                               | 56 |
| Figure S67. COSY (DMSO- <i>d</i> <sub>6</sub> ) spectrum of emindole SB ( <b>14</b> ).....                                               | 57 |
| Figure S68. HMBC (DMSO- <i>d</i> <sub>6</sub> ) spectrum of emindole SB ( <b>14</b> ).....                                               | 57 |
| Figure S69. HRMS spectrum of emindole SB ( <b>14</b> ) .....                                                                             | 58 |
| Figure S70. Single ion extraction of CMB-M0339 fresh crude extract, showing the presence<br>of isolated metabolites .....                | 59 |
| Figure S71. Single ion extraction of crude extract of CMB-M0339, showing the presence of<br>paxilline ( <b>1</b> ).....                  | 59 |
| Figure S72. MS/MS fragmentation pattern of ( <b>5</b> ).....                                                                             | 60 |
| Figure S73. MS/MS fragmentation pattern of ( <b>6</b> )/( <b>8</b> ).....                                                                | 61 |
| Figure S74. MS/MS fragmentation pattern of ( <b>7</b> )/ <b>v</b> .....                                                                  | 62 |
| Figure S75. MS/MS fragmentation pattern of ( <b>9</b> ).....                                                                             | 63 |
| Figure S76. MS/MS fragmentation pattern of <b>i</b> .....                                                                                | 64 |
| Figure S77. MS/MS fragmentation pattern of <b>ii</b> .....                                                                               | 65 |
| Figure S78. MS/MS fragmentation pattern of <b>iii</b> .....                                                                              | 66 |
| Figure S79. MS/MS fragmentation pattern of <b>iv</b> .....                                                                               | 67 |
| Figure S80. Antimicrobial activity of metabolites <b>5–14</b> .....                                                                      | 72 |
| Figure S81. Cytotoxicity of metabolites <b>5–14</b> .....                                                                                | 72 |



### List of tables

|                                                                                                                                                                                                             |    |
|-------------------------------------------------------------------------------------------------------------------------------------------------------------------------------------------------------------|----|
| Table S1. Composition of media used for cultivation profiling .....                                                                                                                                         | 11 |
| Table S2. 1D and 2D NMR (methanol- <i>d</i> <sub>4</sub> , 600 MHz) data for noonindole A ( <b>5</b> ).....                                                                                                 | 13 |
| Table S3. 1D and 2D NMR (methanol- <i>d</i> <sub>4</sub> , 600 MHz) data for noonindole B ( <b>6</b> ).....                                                                                                 | 18 |
| Table S4. 1D and 2D NMR (in methanol- <i>d</i> <sub>4</sub> , 600 MHz) data for noonindole C ( <b>7</b> ).....                                                                                              | 23 |
| Table S5. 1D and 2D NMR (methanol- <i>d</i> <sub>4</sub> , 600 MHz) data for noonindole D ( <b>8</b> ).....                                                                                                 | 28 |
| Table S6. 1D and 2D NMR (methanol- <i>d</i> <sub>4</sub> , 600 MHz) data for noonindole E ( <b>9</b> ) .....                                                                                                | 33 |
| Table S7. 1D and 2D NMR (in methanol- <i>d</i> <sub>4</sub> , 600 MHz) data for noonindole F ( <b>10</b> ) .....                                                                                            | 38 |
| Table S8. 1D and 2D NMR (DMSO- <i>d</i> <sub>6</sub> , 600 MHz) data of paspaline ( <b>11</b> ) .....                                                                                                       | 43 |
| Table S9. 1D and 2D NMR (CDCl <sub>3</sub> , 600 MHz) data of paspaline B ( <b>12</b> ) .....                                                                                                               | 47 |
| Table S10. 1D and 2D NMR (DMSO- <i>d</i> <sub>6</sub> , 600 MHz) data of 12-demethylpaspaline-12-<br>carboxylic acid ( <b>13</b> ) .....                                                                    | 51 |
| Table S11. 1D and 2D NMR (DMSO- <i>d</i> <sub>6</sub> , 600 MHz) data of emindole SB ( <b>14</b> ).....                                                                                                     | 55 |
| Table S12. Molecular formulae generated for noonindoles A-E ( <b>5</b> - <b>9</b> ) and predicted<br>molecular formulae for minor metabolites ( <b>i</b> ) – ( <b>viii</b> ) observed in GNPS cluster ..... | 68 |
| Table S13. Bond lengths [Å] and angles [°] for X-ray crystal structure of noonindole A ( <b>5</b> ).69                                                                                                      |    |

CGGCACCCTCGCGGTGCCAACCTCCCATCCTTGTCTATTGTTACCGTCGTTGCTTCGGCGGG  
 CCCGTTCCCTCCTCCCCGGGGGGAGGGCCGTCGGGGGGGCATTCGCCCCGGGCGAGCGCCCG  
 CCGGAGACCCCAACACGAACCTCTGAGTGAAAGACTGTCGTCTGAGTGGGCTTTTTGAATCAG  
 TTAAAACTTTCAACAACGGATCTCTTGGTTCCGGCATCGATGAAGAACGCAGCGAACTGCGA  
 TAAGTAATGTGAATTGCAGAATTCAGTGAATCATCGAGTCTTTGAACGCATATTGCGCCCCC  
 TGGTATTCCGGGGGGCATGCCTGTCCGAGCGTCATTGCTACCCTCAAGCACGGCTTGTGTGT  
 TGGGTCGGCGTCCCCGGGGAGTCCCCGGGGACGGGCCCCGAAAGGCAGCGGGCGGCACCGCGTC  
 CTGGTCCTCGAGCGTATGGGGCTCTGTCACCCGCTCTGAGGGGCCGGCCGGCGCCTTTGGCC  
 AACCTGTTTATGGGCCCTTCCGGGGGACCGAAACACCATTTTTTTCTCAGGTTGACCTCGGA  
 TCAGGTAGGGATACCCGCTGAACTTAAGCATATCAATAAGGCGGAGGA (606 bp)

**Figure S1.** ITS gene sequence of CMB-M0339

Descriptions

Graphic Summary

Alignments

Taxonomy

Sequences producing significant alignments

DownloadSelect columnsShow100

select all

0 sequences selected

GenBank

Graphics

Distance tree of results

MSA Viewer

| Description                                                                                                                             | Scientific Name                       | Max Score | Total Score | Query Cover | E value | Per. Ident | Acc. Len | Accession                   |
|-----------------------------------------------------------------------------------------------------------------------------------------|---------------------------------------|-----------|-------------|-------------|---------|------------|----------|-----------------------------|
| <a href="#">Aspergillus noonimiae CBS 143382 ITS region; from TYPE material</a>                                                         | <a href="#">Aspergillus nooni...</a>  | 845       | 845         | 98%         | 0.0     | 92.50%     | 712      | <a href="#">NR_156329.1</a> |
| <a href="#">Aspergillus noonimiae isolate GL_10.1.2 small subunit ribosomal RNA gene, partial sequence; internal transcribed ...</a>    | <a href="#">Aspergillus nooni...</a>  | 815       | 815         | 94%         | 0.0     | 92.41%     | 623      | <a href="#">OM732485.1</a>  |
| <a href="#">Aspergillus keratitidis culture DAOMC:251739 strain KAS:8116 18S ribosomal RNA gene, partial sequence; intern...</a>        | <a href="#">Aspergillus kerati...</a> | 808       | 808         | 100%        | 0.0     | 90.92%     | 713      | <a href="#">KY980633.1</a>  |
| <a href="#">Aspergillus keratitidis isolate F29 ITS5 internal transcribed spacer 1, partial sequence; 5.8S ribosomal RNA gene ...</a>   | <a href="#">Aspergillus kerati...</a> | 808       | 808         | 100%        | 0.0     | 90.82%     | 637      | <a href="#">MW187754.1</a>  |
| <a href="#">Aspergillus noonimiae isolate SA.3.1 internal transcribed spacer 1, partial sequence; 5.8S ribosomal RNA gene an...</a>     | <a href="#">Aspergillus nooni...</a>  | 802       | 802         | 100%        | 0.0     | 90.66%     | 622      | <a href="#">OM242948.1</a>  |
| <a href="#">Aspergillus keratitidis culture DAOMC:251750 strain KAS:7927 18S ribosomal RNA gene, partial sequence; intern...</a>        | <a href="#">Aspergillus kerati...</a> | 800       | 800         | 100%        | 0.0     | 90.66%     | 717      | <a href="#">KY980626.1</a>  |
| <a href="#">Aspergillus sclerotialis isolate GL_14.2.1 small subunit ribosomal RNA gene, partial sequence; internal transcribed ...</a> | <a href="#">Aspergillus scler...</a>  | 798       | 798         | 99%         | 0.0     | 90.63%     | 649      | <a href="#">OM491163.1</a>  |
| <a href="#">Aspergillus keratitidis culture DAOMC:251748 strain KAS:8117 18S ribosomal RNA gene, partial sequence; intern...</a>        | <a href="#">Aspergillus kerati...</a> | 797       | 797         | 100%        | 0.0     | 90.21%     | 737      | <a href="#">KY980634.1</a>  |
| <a href="#">Aspergillus keratitidis culture DAOMC:251738 strain KAS:8109 18S ribosomal RNA gene, partial sequence; intern...</a>        | <a href="#">Aspergillus kerati...</a> | 797       | 797         | 100%        | 0.0     | 90.51%     | 718      | <a href="#">KY980627.1</a>  |
| <a href="#">Aspergillus keratitidis culture DAOMC:251747 strain KAS:8114 18S ribosomal RNA gene, partial sequence; intern...</a>        | <a href="#">Aspergillus kerati...</a> | 789       | 789         | 100%        | 0.0     | 90.32%     | 716      | <a href="#">KY980632.1</a>  |
| <a href="#">Aspergillus keratitidis culture DAOMC:251745 strain KAS:8112 18S ribosomal RNA gene, partial sequence; intern...</a>        | <a href="#">Aspergillus kerati...</a> | 789       | 789         | 100%        | 0.0     | 90.32%     | 716      | <a href="#">KY980630.1</a>  |
| <a href="#">Aspergillus waynelawii CBS 143384 ITS region; from TYPE material</a>                                                        | <a href="#">Aspergillus wayn...</a>   | 787       | 787         | 99%         | 0.0     | 90.48%     | 720      | <a href="#">NR_156328.1</a> |
| <a href="#">Aspergillus keratitidis culture DAOMC:251740 strain KAS:8119 18S ribosomal RNA gene, partial sequence; intern...</a>        | <a href="#">Aspergillus kerati...</a> | 787       | 787         | 100%        | 0.0     | 89.91%     | 738      | <a href="#">KY980636.1</a>  |
| <a href="#">Aspergillus keratitidis culture DAOMC:251743 strain KAS:8110 18S ribosomal RNA gene, partial sequence; intern...</a>        | <a href="#">Aspergillus kerati...</a> | 787       | 787         | 100%        | 0.0     | 89.89%     | 738      | <a href="#">KY980628.1</a>  |
| <a href="#">Aspergillus keratitidis culture BCRC:34221 strain DTO:198-E8 18S ribosomal RNA gene, partial sequence; internal...</a>      | <a href="#">Aspergillus kerati...</a> | 787       | 787         | 100%        | 0.0     | 90.22%     | 720      | <a href="#">KY980616.1</a>  |
| <a href="#">Aspergillus keratitidis strain FONAATOO-18-3 internal transcribed spacer 1, partial sequence; 5.8S ribosomal RNA ...</a>    | <a href="#">Aspergillus kerati...</a> | 782       | 782         | 96%         | 0.0     | 90.97%     | 591      | <a href="#">MZ447972.1</a>  |
| <a href="#">Sagenomella keratitidis strain UZ597_17 small subunit ribosomal RNA gene, partial sequence; internal transcribed ...</a>    | <a href="#">Aspergillus kerati...</a> | 776       | 776         | 97%         | 0.0     | 90.46%     | 645      | <a href="#">MF417472.1</a>  |

**Figure S2.** NCBI-BLAST search of 18S rRNA sequence of CMB-M0339

### Aspergillus noonimiae CBS 143382 ITS region; from TYPE material

Sequence ID: [NR\\_156329.1](#) Length: 712 Number of Matches: 1

[See 1 more title\(s\)](#) [See all Identical Proteins\(IPG\)](#)

Range 1: 52 to 642 [GenBank](#) [Graphics](#)

[▼ Next Match](#) [▲ Previous Match](#)

| Score         | Expect                                                       | Identities   | Gaps       | Strand    |
|---------------|--------------------------------------------------------------|--------------|------------|-----------|
| 845 bits(457) | 0.0                                                          | 555/600(93%) | 15/600(2%) | Plus/Plus |
| Query 13      | GGTGCCAACTCCCATCCTTGCTATTGTTACCGTCGTTGCTTCGGCGGGCCCGTTCTC    |              |            | 72        |
| Sbjct 52      | GGTGCCAACTCCCATCCTTGCTATTG-TACCTTCGTTGCTTCGGCGGGCCCGTTCTC    |              |            | 110       |
| Query 73      | CT---CCCCCGGG-GGGAGGGCGTCGGGGGGCATTGCCCCGGGGCAGCGCCGCGCG     |              |            | 128       |
| Sbjct 111     | CTTCCCCCGGGAAAGAGGGCCGTCGGGGGGCAGTCGCCCGGGCGTGTGCCCGCCGG     |              |            | 170       |
| Query 129     | AGACCCCAACACGAACCTCTGAGTGAAGACTGTCGTCGAGTGGGCTTTT-TGAATCAGT  |              |            | 187       |
| Sbjct 171     | AGACCCCAACACGAACCTCTGCTGAAAGACTGTCGTCGAGTGGGCTTTTATAAATCATT  |              |            | 230       |
| Query 188     | TAAAACCTTCAACAACGGATCTCTTGGTTCCGGCATCGATGAAGAACGACGCAACTCGG  |              |            | 247       |
| Sbjct 231     | TAAAACCTTCAACAACGGATCTCTTGGTTCCGGCATCGATGAAGAACGACGCAACTCGG  |              |            | 290       |
| Query 248     | ATAAGTAATGTGAATTGCAGAATTCAGTGAATCATCGAGTCTTTGAACGCATATTGCGCC |              |            | 307       |
| Sbjct 291     | ATAAGTAATGTGAATTGCAGAATTCAGTGAATCATCGAGTCTTTGAACGCATATTGCGCC |              |            | 350       |
| Query 308     | CCCTGGTATTCCGGGGGGCATGCCGTCCGAGCGTCATTGCTACCCCTCAAGCACGGCTTG |              |            | 367       |
| Sbjct 351     | CCCTGGTATTCCGGGGGGCATGCCGTCCGAGCGTCATTGCTACCCCTCAAGCACGGCTTG |              |            | 410       |
| Query 368     | TGTGTTGGGTCGGCGTCCCCGGGGAGT-CCCCGGGGACGGGCCCGAAAGGCAGCGCGGC  |              |            | 426       |
| Sbjct 411     | TGTGTTGGGTCGGCGTCCCCGGGGAGT-CCCCGGGGACGGGCCCGAAAGGCAGCGCGGC  |              |            | 470       |
| Query 427     | ACCGCGTCCTGCTCTCGAGCGTATGGGGCTCTGTACCCGCTCTGAGGGGCCCGCGCGC   |              |            | 486       |
| Sbjct 471     | ACCGCGTCCTGCTCTCGAGCGTATGGGGCTCTGTACCCGCTCTGAGGGGCCCGCGCGC   |              |            | 530       |
| Query 487     | GCCTTTGGCCAACTGTTTATGGGCCCTTCCGGGGACCGAAACACCAttttttCTCAG    |              |            | 546       |
| Sbjct 531     | GCCTTTGGCCAACTTATTTTCTGCTC--TTCGGS--ATCGAAAAC--TTC-TTCTTAG   |              |            | 583       |
| Query 547     | GTTGACCTCGGATCAGGTAGGGATACCGCTGAACCTAAGCATATCAATAAGCGCGAGGA  |              |            | 606       |
| Sbjct 584     | GTTGACCTCGGATCAGGTAGGGATACCGCTGAACCTAAGCATATCAATAAG-CGAGGA   |              |            | 642       |

### Aspergillus noonimiae CBS 143382 ITS region; from TYPE material

NCBI Reference Sequence: [NR\\_156329.1](#)

[FASTA](#) [Graphics](#)

Go to: ☒

|            |                                                                                                                                                                                                                    |        |     |        |                 |
|------------|--------------------------------------------------------------------------------------------------------------------------------------------------------------------------------------------------------------------|--------|-----|--------|-----------------|
| LOCUS      | NR_156329                                                                                                                                                                                                          | 712 bp | DNA | linear | PLN 27-JUN-2018 |
| DEFINITION | Aspergillus noonimiae CBS 143382 ITS region; from TYPE material.                                                                                                                                                   |        |     |        |                 |
| ACCESSION  | NR_156329                                                                                                                                                                                                          |        |     |        |                 |
| VERSION    | NR_156329.1                                                                                                                                                                                                        |        |     |        |                 |
| DBLINK     | BioProject: <a href="#">PRJNA177353</a>                                                                                                                                                                            |        |     |        |                 |
| KEYWORDS   | RefSeq.                                                                                                                                                                                                            |        |     |        |                 |
| SOURCE     | Aspergillus noonimiae                                                                                                                                                                                              |        |     |        |                 |
| ORGANISM   | <a href="#">Aspergillus noonimiae</a><br>Eukaryota; Fungi; Dikarya; Ascomycota; Pezizomycotina;<br>Eurotiomycetes; Eurotiomycetidae; Eurotiales; Aspergillaceae;<br>Aspergillus; Aspergillus subgen. Polypaecilum. |        |     |        |                 |
| REFERENCE  | 1 (bases 1 to 712)                                                                                                                                                                                                 |        |     |        |                 |
| AUTHORS    | Tanney,J.B., Visagie,C.M., Yilmaz,N. and Seifert,K.A.                                                                                                                                                              |        |     |        |                 |
| TITLE      | Aspergillus subgenus Polypaecilum from the built environment                                                                                                                                                       |        |     |        |                 |
| JOURNAL    | Stud. Mycol. 88, 237-267 (2018)                                                                                                                                                                                    |        |     |        |                 |
| REFERENCE  | 2 (bases 1 to 712)                                                                                                                                                                                                 |        |     |        |                 |
| CONSRM     | NCBI RefSeq Targeted Loci Project                                                                                                                                                                                  |        |     |        |                 |
| TITLE      | Direct Submission                                                                                                                                                                                                  |        |     |        |                 |
| JOURNAL    | Submitted (01-MAY-2018) National Center for Biotechnology<br>Information, NIH, Bethesda, MD 20894, USA                                                                                                             |        |     |        |                 |
| REFERENCE  | 3 (bases 1 to 712)                                                                                                                                                                                                 |        |     |        |                 |
| AUTHORS    | Tanney,J.B., Visagie,C.M., Yilmaz,N. and Seifert,K.A.                                                                                                                                                              |        |     |        |                 |
| TITLE      | Direct Submission                                                                                                                                                                                                  |        |     |        |                 |
| JOURNAL    | Submitted (21-APR-2017) Biodiversity (Mycology), Agriculture and<br>Agri-Food Canada, 960 Carling Avenue, Ottawa, Ontario K1A0C6,<br>Canada                                                                        |        |     |        |                 |

Figure S3. Blast search (closest match) for CMB-M0339

## 1 Phylogenetic tree

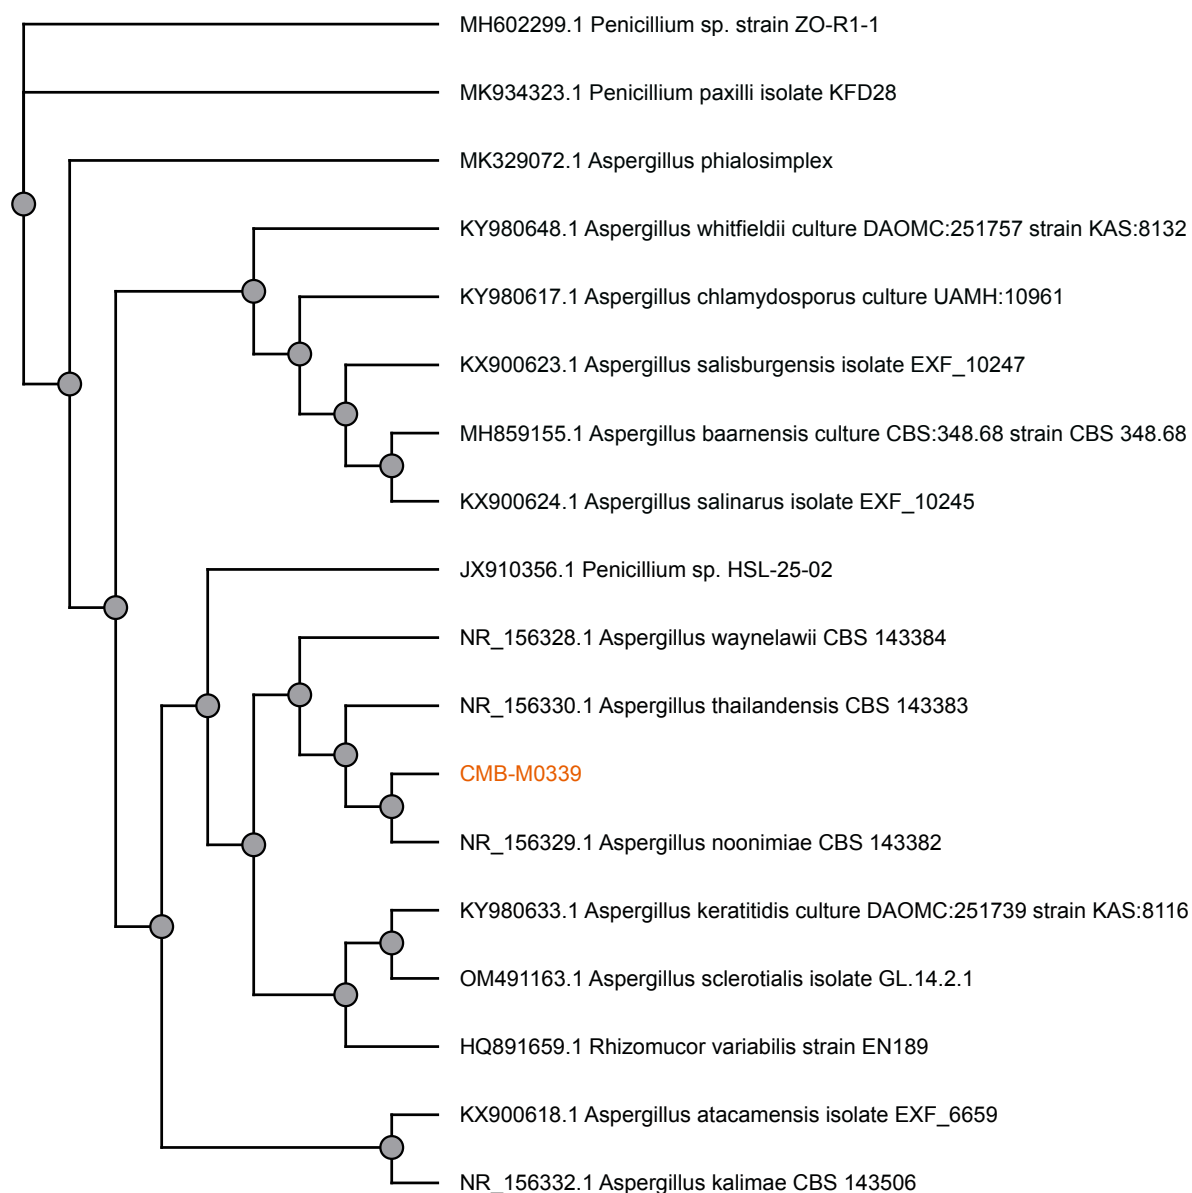

**Figure S4.** Phylogenetic tree by PhyML Maximum Likelihood analysis of 18s rRNA sequences showing the relationship of CMB-M0339 among selected reference strains (RefSeq GenBank) with the accession numbers

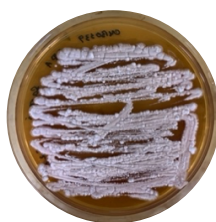

**Figure S5.** CMB-M0339 cultivated on SD agar

## 2 Chemical investigation of CMB-M0339

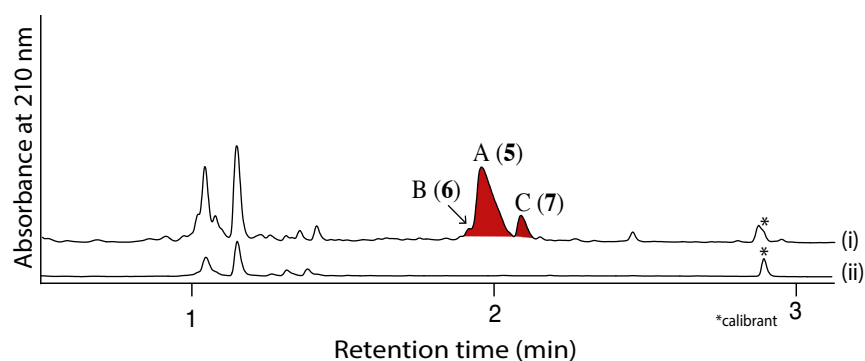

**Figure S6.** UPLD-DAD chromatograms of (i) crude extract of CMB-M0339 cultivated on M1 agar (supplemented with 3.3% artificial sea salt) (ii) Media blank

The crude extract of *Aspergillus* sp. CMB-M0339 cultivated on M1 agar (supplemented with 3.3% artificial sea salt) was subjected to UPLC-DAD analysis which revealed the production of one major metabolite, noonindole A (5) and two minor metabolites, noonindoles B (6) and C (7) sharing similar UV-Vis chromophore.

## 3 MATRIX cultivation profiling of CMB-M0339

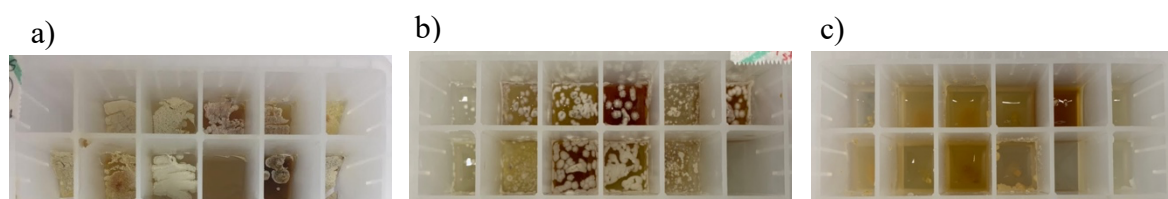

**Figure S7.** CMB-M0339 cultivated under MATRIX conditions. (a) agar (b) static broth (c) shaken broth

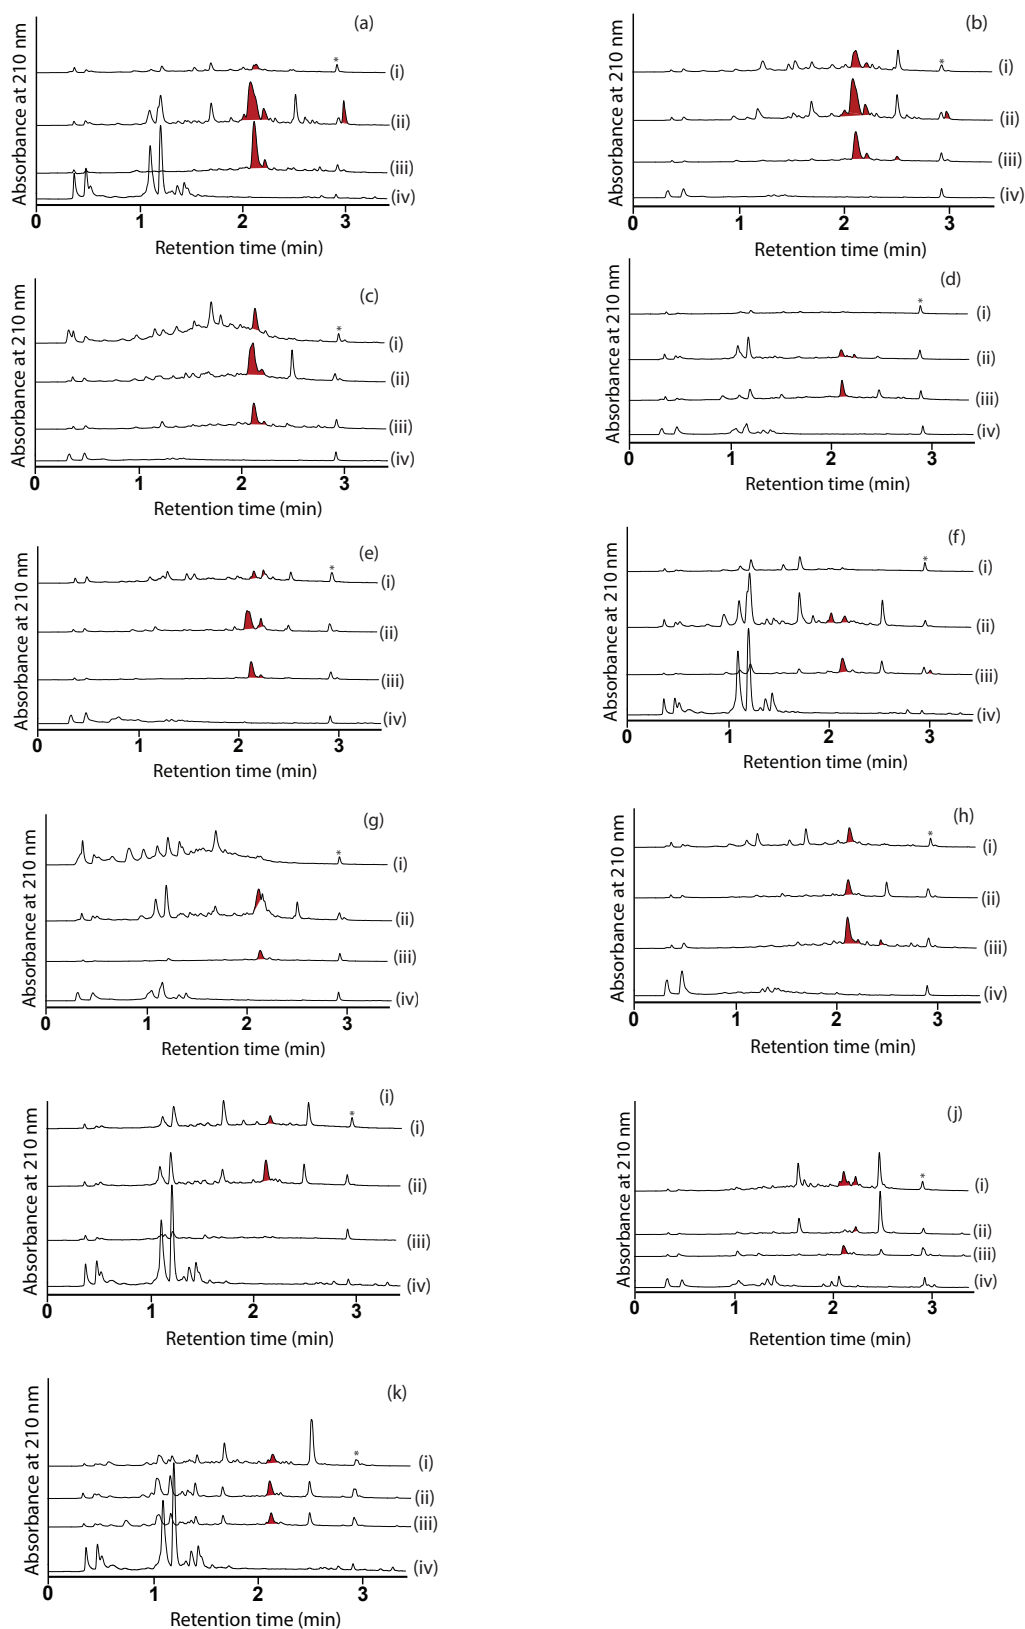

**Figure S8.** UPLC-DAD chromatograms of MATRIX extracts of CMB-M0339 showing the production of noonindoles A–C (**5–7**) (highlighted in red) in different media and culture conditions; (a) D400, (b) GY, (c) IM, (d) M1, (e) M2, (f) SGG, (g) YEME, (h) YES, (i) 333, (j) PD, (k) SD, (i) shaken broth, (ii) static broth, (iii) agar, (iv) Media blank, \* Internal calibrant

**Table S1. Composition of media used for cultivation profiling**

| <b>Medium</b>        | <b>Composition (per Litre)</b>                                                                                                                                                                                    |
|----------------------|-------------------------------------------------------------------------------------------------------------------------------------------------------------------------------------------------------------------|
| <b>M1</b>            | Peptone (2.0 g), yeast extract (4.0 g), starch (10.0 g), artificial sea salt (33.0 g), agar (18.0 g)                                                                                                              |
| <b>M2</b>            | Mannitol (40.0 g), maltose (40.0 g), yeast extract (10.0 g), K <sub>2</sub> HPO <sub>4</sub> (2.0 g), MgSO <sub>4</sub> ·7H <sub>2</sub> O (0.5 g), FeSO <sub>4</sub> ·7H <sub>2</sub> O (0.01 g), agar (18.0 g), |
| <b>IM</b>            | Yeast extract (Difco) (4.0 g), malt extract (Difco) (10.0 g), glucose (country brewers) (4.0 g), mannitol (Amyl) 40.0 g, agar (Amyl) (18.0 g)                                                                     |
| <b>Modified YEME</b> | Bacto peptone (Difco) (5.0 g), yeast extract (Difco) (3.0 g), Oxoin malt extract (3.0 g), glucose (10.0 g), sucrose (170.0 g), agar (18.0 g)                                                                      |
| <b>GY</b>            | Yeast extract (Difco) (4.0 g), malt extract (Difco) (10.0 g), glucose (country brewers) (4.0 g), CaCO <sub>3</sub> (Univar Ajax) (2.0 g), soluble starch (Difco) (20.0 g), agar (Amyl) (18.0 g)                   |
| <b>YES</b>           | Sucrose (150 g), yeast extract (20 g), MgSO <sub>4</sub> ·7H <sub>2</sub> O (0.5 g), ZnSO <sub>4</sub> ·7H <sub>2</sub> O (0.01 g), CuSO <sub>4</sub> ·5H <sub>2</sub> O (0.005 g), agar (18.0 g)                 |
| <b>D400</b>          | Glucose (10.0 g), malt extract (3.0 g), peptone (3.0 g), soluble starch (20.0 g), yeast extract (5.0 g), CaCO <sub>3</sub> (3.0 g), agar (18.0 g).                                                                |
| <b>SGG</b>           | Glucose (10.0 g), glycerol (10.0 g), cornsteep powder (2.5 g), peptone (5.0 g), soluble starch 10.0 g), yeast extract (2.0 g), CaCO <sub>3</sub> (3.0 g), NaCl (1.0 g), agar (18.0 g).                            |
| <b>333</b>           | Glucose (5.0 g), peptone (3.0 g), soluble starch (10.0 g), yeast extract (3.0 g), CaCO <sub>3</sub> (2.0 g), agar (18.0 g).                                                                                       |
| <b>PD</b>            | Potato extract (4.0 g), dextrose (20.0 g), agar (18 g)                                                                                                                                                            |
| <b>SD</b>            | Peptic digest of animal tissue (5.0 g), pancreatic digest of casein (5.0 g), dextrose (40.0 g), agar (18 g)                                                                                                       |

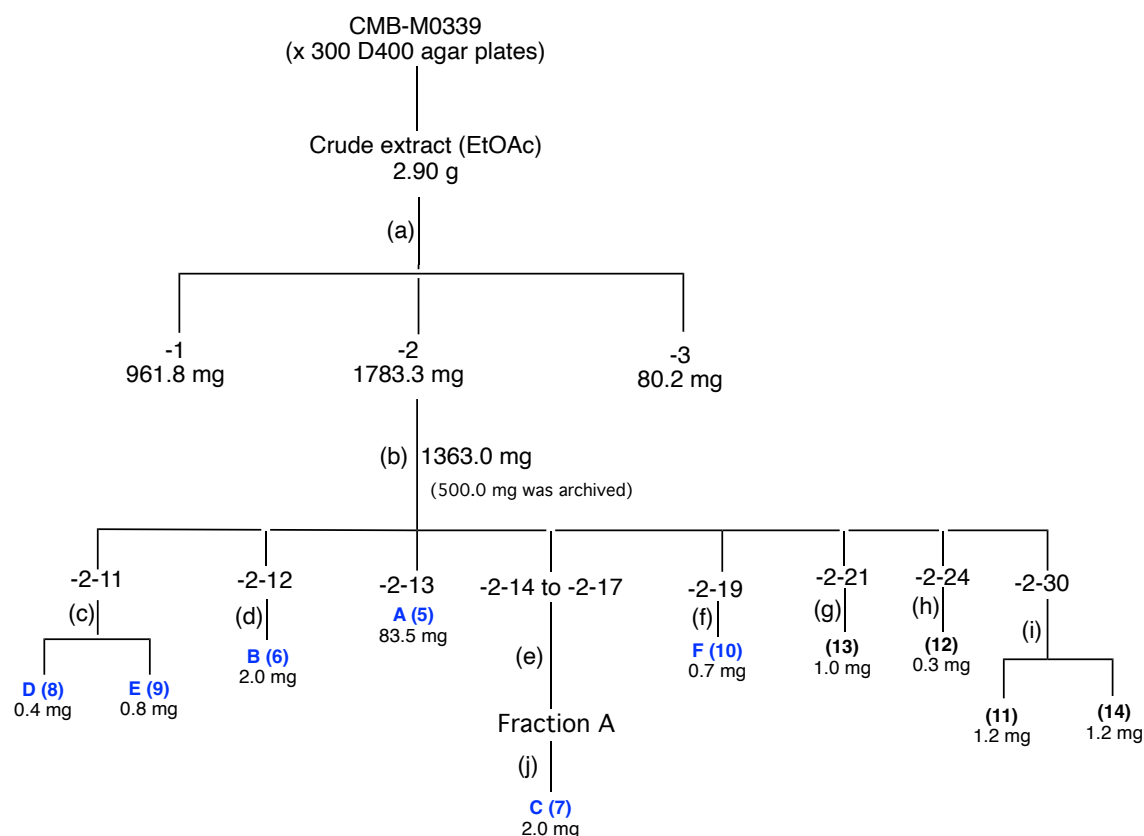

**Figure S9.** Isolation scheme for **5-14** from CMB-M0339. (a) Trituration [hexane (-1), DCM (-2), MeOH (-3)]. (b) Preparative HPLC (Phenomenex Luna-C<sub>8</sub> 10  $\mu$ m, 21.2  $\times$  250 mm column, 20 mL/min gradient elution from 90% H<sub>2</sub>O/MeCN to 100% MeCN over 20 min with constant 0.1% TFA modifier). (c) Semi preparative HPLC (Zorbax C<sub>18</sub> 5  $\mu$ m column, 9.4  $\times$  250 mm, 3 mL/min isocratic elution of 40% MeCN/H<sub>2</sub>O over 30 min with constant 0.1% TFA modifier). (d) Semi preparative HPLC (Zorbax C<sub>8</sub> 5  $\mu$ m column, 9.4  $\times$  250 mm, 3 mL/min isocratic elution of 37% MeCN/H<sub>2</sub>O over 20 min with constant 0.1% TFA modifier). (e) Column chromatography: Sep-Pak (Agilent Bond Elut C<sub>18</sub> column, 5 g) gradient elution from 90% H<sub>2</sub>O/MeCN to 100% MeCN (f) Semi preparative HPLC (Agilent C<sub>8</sub>-Ep 5  $\mu$ m column, 9.4  $\times$  250 mm, 3 mL/min isocratic elution of 50% MeCN/H<sub>2</sub>O over 25 min with constant 0.1% TFA modifier). (g) Semi preparative HPLC (Zorbax C<sub>18</sub> 5  $\mu$ m column, 9.4  $\times$  250 mm, 3 mL/min isocratic elution of 85% MeCN/H<sub>2</sub>O over 15 min with constant 0.1% TFA modifier). (h) Semi preparative HPLC (Agilent C<sub>8</sub>-Ep 5  $\mu$ m column, 9.4  $\times$  250 mm, 3 mL/min isocratic elution of 60% MeCN/H<sub>2</sub>O over 25 min with constant 0.1% TFA modifier). (i) Semi preparative HPLC (Agilent CN 5  $\mu$ m column, 9.4  $\times$  250 mm, 3 mL/min isocratic elution of 60% MeCN/H<sub>2</sub>O over 20 min with constant 0.1% TFA modifier). (j) Zorbax C<sub>8</sub> 5  $\mu$ m column, 9.4  $\times$  250 mm, 3 mL/min isocratic elution of 40% MeCN/H<sub>2</sub>O over 20 min with constant 0.1% TFA modifier



#### 4 Noonindole A (5)

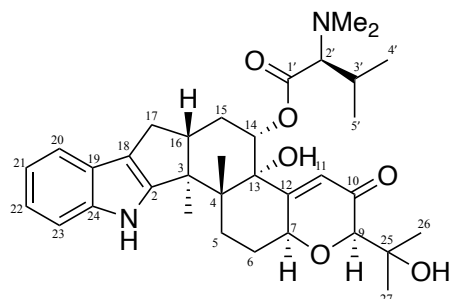

**Table S2.** 1D and 2D NMR (methanol-*d*<sub>4</sub>, 600 MHz) data for noonindole A (5)

| Pos.             | $\delta_{\text{H}}$ , mult. ( <i>J</i> in Hz)                                                                | $\delta_{\text{C}}$ | COSY                                                            | $^1\text{H}$ - $^{13}\text{C}$ HMBC            | ROESY                    |
|------------------|--------------------------------------------------------------------------------------------------------------|---------------------|-----------------------------------------------------------------|------------------------------------------------|--------------------------|
| 1-NH             | -                                                                                                            | -                   | -                                                               | -                                              | -                        |
| 2                | -                                                                                                            | 152.4               | -                                                               | -                                              | -                        |
| 3                | -                                                                                                            | 52.0                | -                                                               | -                                              | -                        |
| 4                | -                                                                                                            | 46.4                | -                                                               | -                                              | -                        |
| 5                | <i>a</i> 2.87 (ddd, 1H, <i>J</i> = 13.6, 13.6, 5.2 Hz)<br><i>b</i> 1.81 (br dd, 1H, <i>J</i> = 13.6, 5.2 Hz) | 28.1                | 5 <i>b</i> , 6 <i>a</i> , 6 <i>b</i><br>5 <i>a</i> , 6 <i>b</i> | 4, 6, 13, 3<br>4, 6, 7, 13                     | 3-Me                     |
| 6                | <i>a</i> 2.38 (m, 1H)<br><i>b</i> 1.91 (m, 1H)                                                               | 30.6                | 5 <i>a</i> , 6 <i>b</i> , 7<br>5 <i>a</i> , 6 <i>a</i> , 7      | 5, 7, 4, 12<br>5, 7                            | -                        |
| 7                | 4.91 (m, 1H)                                                                                                 | 74.6                | 6, 9, 11                                                        | 6, 11, 12                                      | 9                        |
| 9                | 3.68 (d, 1H, <i>J</i> = 1.9 Hz)                                                                              | 84.0                | 7                                                               | 7, 25, 26, 27, 10                              | 7, 27                    |
| 10               | -                                                                                                            | 198.5               | -                                                               | -                                              | -                        |
| 11               | 5.62 (d, 1H, <i>J</i> = 1.9 Hz)                                                                              | 122.4               | 7                                                               | 7, 9, 13                                       | -                        |
| 12               | -                                                                                                            | 165.9               | -                                                               | -                                              | -                        |
| 13               | -                                                                                                            | 80.0                | -                                                               | -                                              | -                        |
| 14               | 5.53 (dd, 1H, <i>J</i> = 10.2, 5.3 Hz)                                                                       | 77.9                | 15 <i>a</i> , 15 <i>b</i>                                       | 15, 1'                                         | 16                       |
| 15               | <i>a</i> 2.24 (dd, 1H, <i>J</i> = 11.1, 10.2 Hz)<br><i>b</i> 2.21 (m, 1H)                                    | 28.5                | 14, 15 <i>b</i> , 16<br>14, 15 <i>a</i> , 16                    | 3, 13, 14, 16<br>3, 13, 14, 16                 | 3-Me                     |
| 16               | 2.92 (m, 1H)                                                                                                 | 47.4                | 15 <i>a</i> , 15 <i>b</i> , 17 <i>a</i>                         | 17, 3-Me, 3                                    | 14                       |
| 17               | <i>a</i> 2.73 (dd, 1H, <i>J</i> = 13.0, 6.2 Hz)<br><i>b</i> 2.47 <sup>a</sup> (m, 1H)                        | 27.6                | 16, 17 <i>b</i> <sup>a</sup><br>-                               | 2, 3, 15, 16, 18<br>-                          | -                        |
| 18               | -                                                                                                            | 117.4               | -                                                               | -                                              | -                        |
| 19               | -                                                                                                            | 126.2               | -                                                               | -                                              | -                        |
| 20               | 7.31 (d, 1H, <i>J</i> = 7.5 Hz)                                                                              | 119.0               | 21                                                              | 18, 22, 24                                     | -                        |
| 21               | 6.94 (ddd, 1H, <i>J</i> = 7.5, 7.5, 1.1 Hz)                                                                  | 120.1               | 20, 22                                                          | 19, 23                                         | -                        |
| 22               | 6.98 (ddd, 1H, <i>J</i> = 7.5, 7.5, 1.1 Hz)                                                                  | 121.1               | 21, 23                                                          | 20, 24                                         | -                        |
| 23               | 7.27 (d, 1H, <i>J</i> = 7.5 Hz)                                                                              | 112.7               | 22                                                              | 19, 21                                         | -                        |
| 24               | -                                                                                                            | 141.8               | -                                                               | -                                              | -                        |
| 25               | -                                                                                                            | 73.3                | -                                                               | -                                              | -                        |
| 26               | 1.28 (s, 3H)                                                                                                 | 25.4                | -                                                               | 9, 25, 27                                      | -                        |
| 27               | 1.26 (s, 3H)                                                                                                 | 26.2                | -                                                               | 9, 25, 26                                      | 9                        |
| 1'               | -                                                                                                            | 167.4               | -                                                               | -                                              | -                        |
| 2'               | 3.86 (d, 1H, <i>J</i> = 5.5 Hz)                                                                              | 74.8                | 3' <sup>a</sup>                                                 | 1', 3', 4' <sup>b</sup> , 5', NMe <sub>2</sub> | NMe <sub>2</sub>         |
| 3'               | 2.47 <sup>a</sup> (m, 1H)                                                                                    | 28.4                | -                                                               | -                                              | -                        |
| 4'               | 1.05 <sup>b</sup>                                                                                            | 19.4                | 3' <sup>a</sup>                                                 | 5'                                             | -                        |
| 5'               | 1.03 (d, 1H, <i>J</i> = 7.1 Hz)                                                                              | 17.0                | 3' <sup>a</sup>                                                 | 4' <sup>b</sup>                                | -                        |
| 3-Me             | 1.37 (s, 3H)                                                                                                 | 16.7                | -                                                               | 2, 3, 4, 16                                    | 15 <i>a</i> , 5 <i>a</i> |
| 4-Me             | 1.04 <sup>b</sup>                                                                                            | 19.4                | -                                                               | 13, 3, 4                                       | -                        |
| NMe <sub>2</sub> | 2.90 (s, 6H)                                                                                                 | 43.0                | -                                                               | 2', NMe <sub>2</sub>                           | 2'                       |

<sup>a-b</sup> Resonances with the same superscript within a column are overlapping and assignments may be interchanged

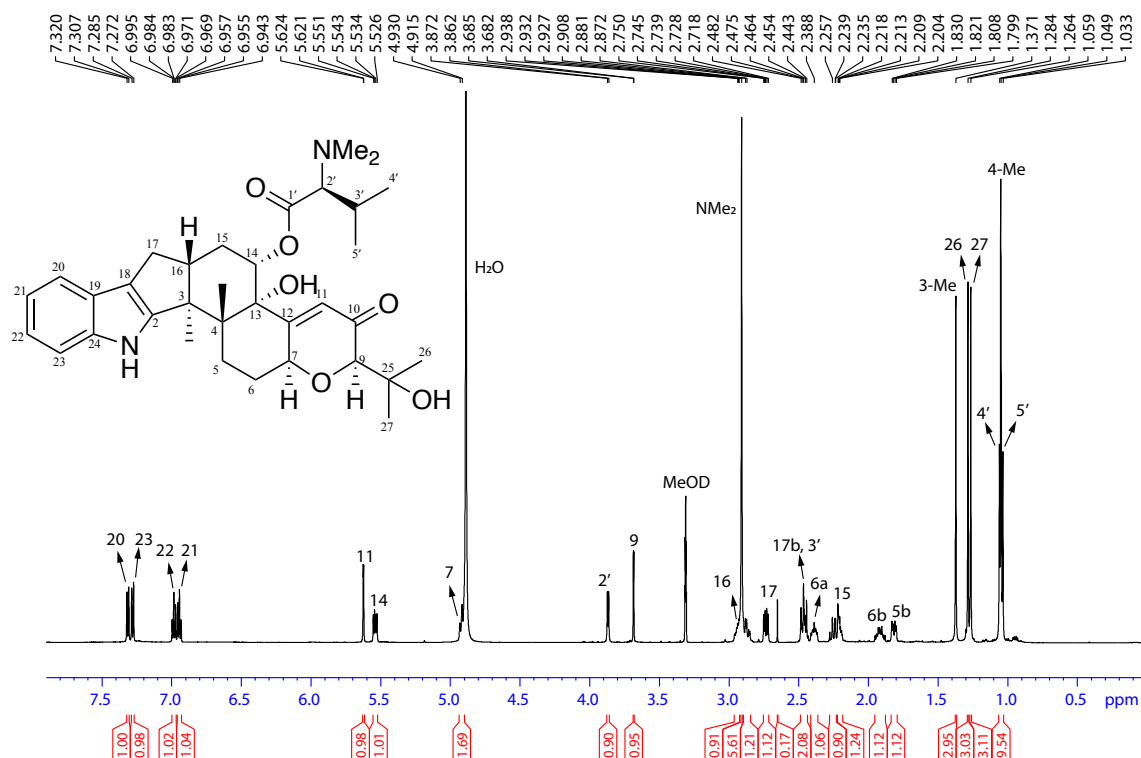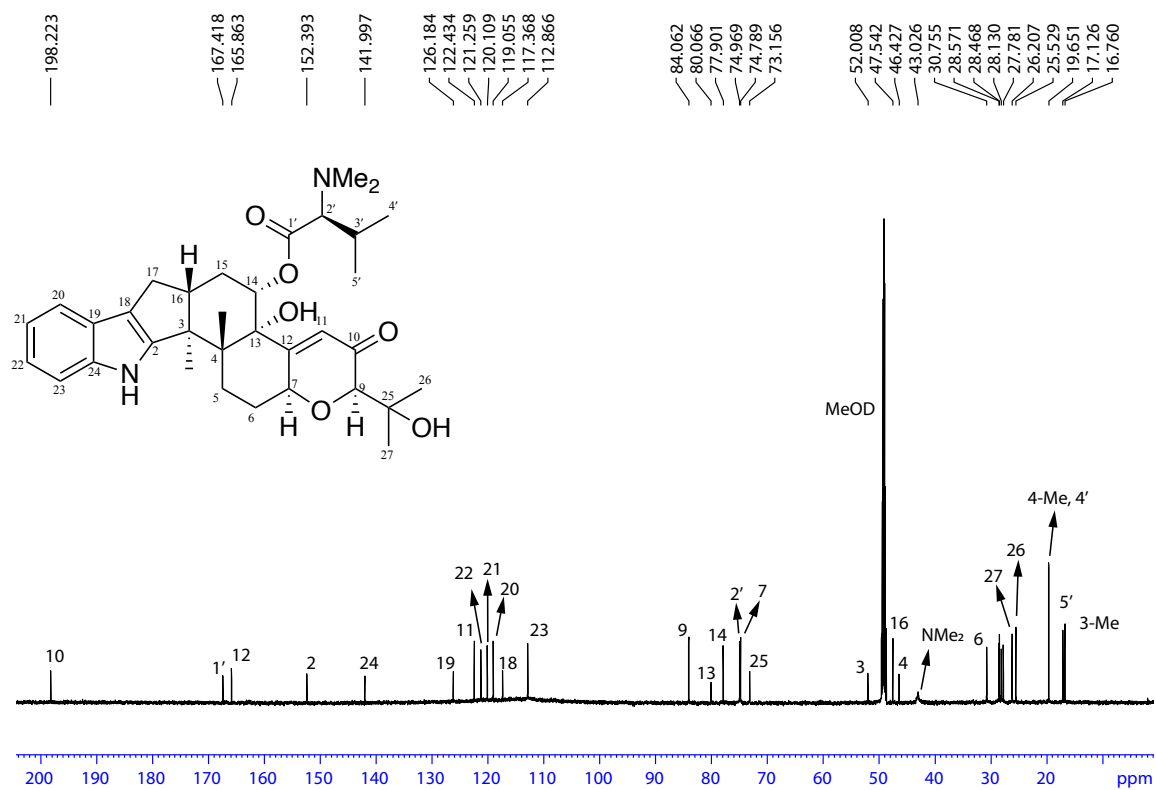

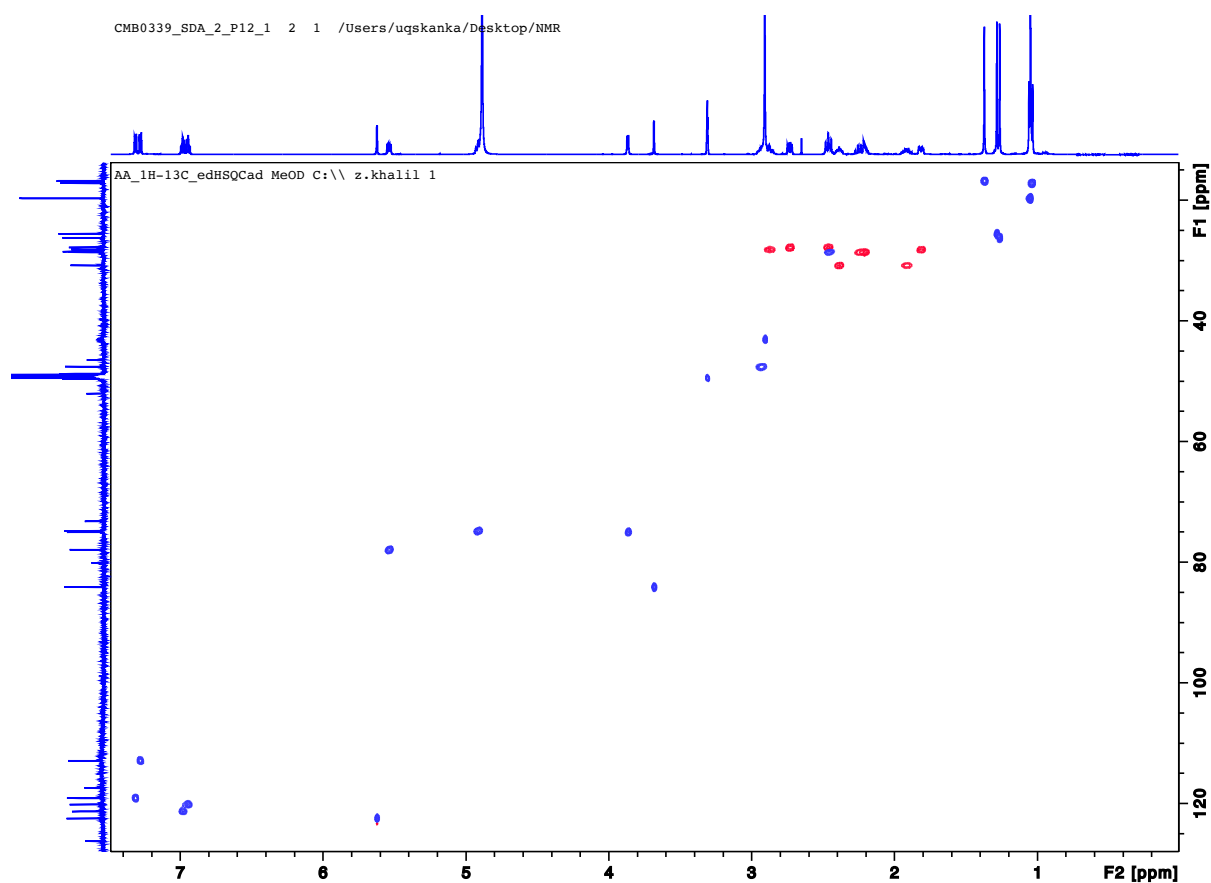

**Figure S12.** HSQC (methanol- $d_4$ ) spectrum of noonindole A (**5**)

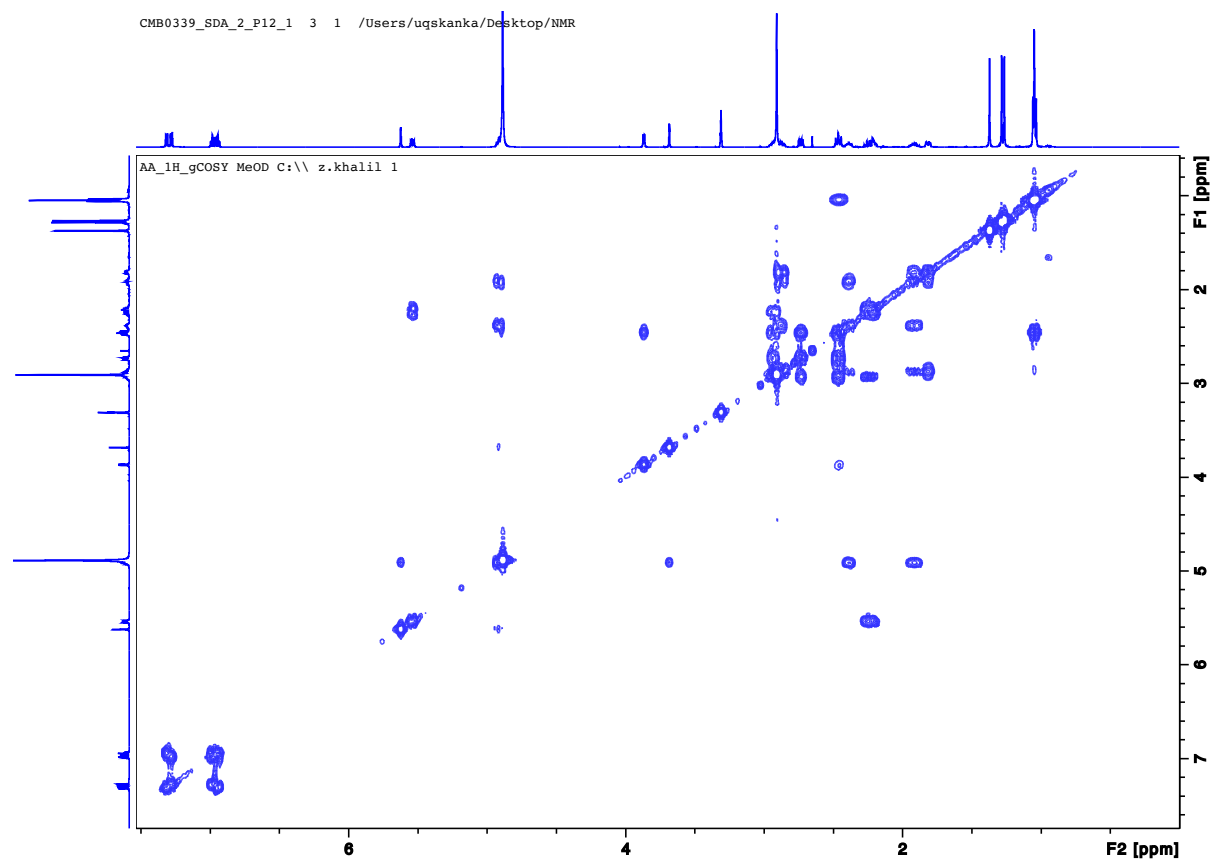

**Figure S13.** COSY (methanol- $d_4$ ) spectrum of noonindole A (**5**)

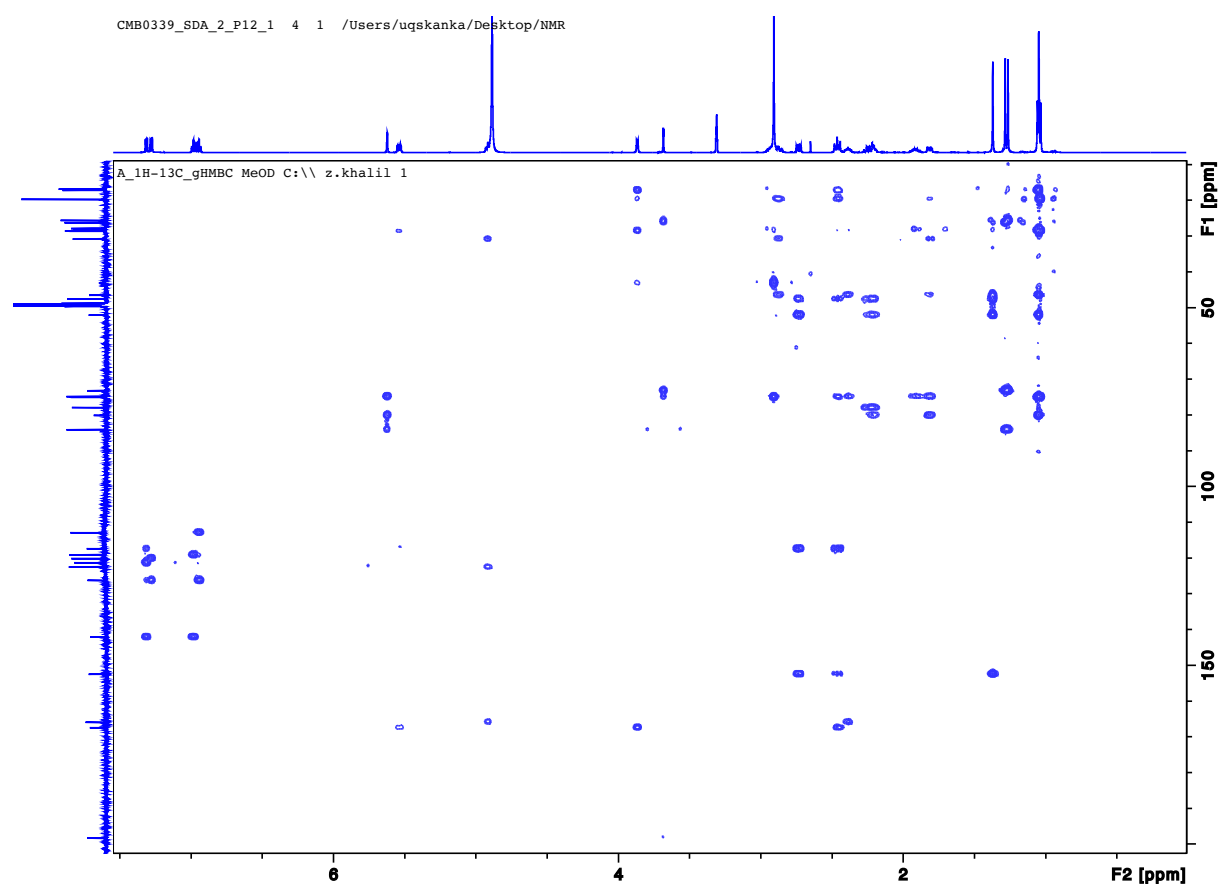

**Figure S14.** HMBC (methanol- $d_4$ ) spectrum of noonindole A (5)

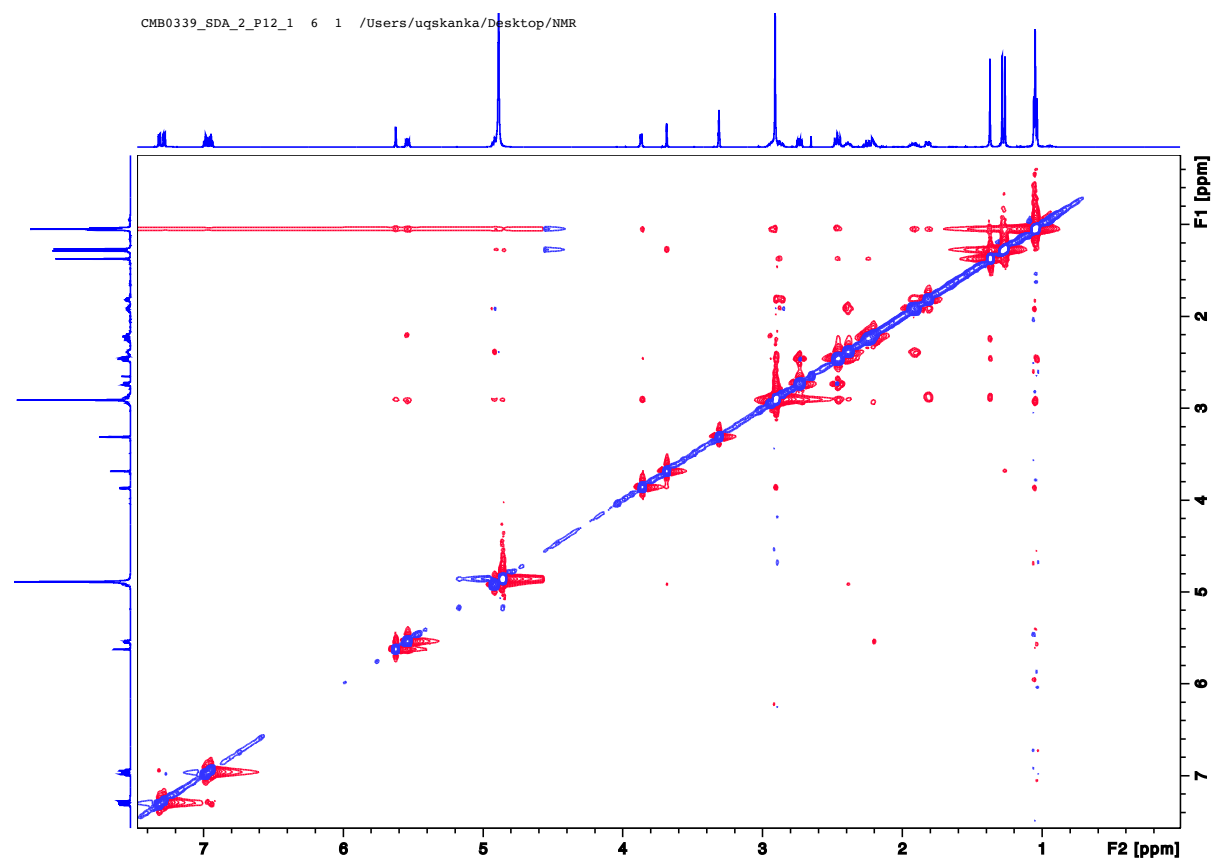

**Figure S15.** ROESY (methanol- $d_4$ ) spectrum of noonindole A (5)

## Mass Spectrum Molecular Formula Report

### Analysis Info

Analysis Name D:\Data\k.kankaname\CMB0339\_SDA\_2\_P12.d  
 Method tune-medhigh\_AP.m  
 Sample Name CMB0339\_SDA\_2\_P12  
 Comment

Acquisition Date 10/28/2020 4:38:30 PM

Operator a.salim  
 Instrument / Ser# micrOTOF 213750.00  
 232

### Acquisition Parameter

|             |            |                      |          |                  |           |
|-------------|------------|----------------------|----------|------------------|-----------|
| Source Type | ESI        | Ion Polarity         | Positive | Set Nebulizer    | 0.5 Bar   |
| Focus       | Not active |                      |          | Set Dry Heater   | 180 °C    |
| Scan Begin  | 100 m/z    | Set Capillary        | 4500 V   | Set Dry Gas      | 5.0 l/min |
| Scan End    | 1500 m/z   | Set End Plate Offset | -500 V   | Set Divert Valve | Source    |

### Generate Molecular Formula Parameter

|                  |                        |         |
|------------------|------------------------|---------|
| Formula, min.    |                        |         |
| Formula, max.    |                        |         |
| Measured m/z     | Tolerance              | Charge  |
| Check Valence    | Minimum                | Maximum |
| Nitrogen Rule    | Electron Configuration |         |
| Filter H/C Ratio | Minimum                | Maximum |
| Estimate Carbon  |                        |         |

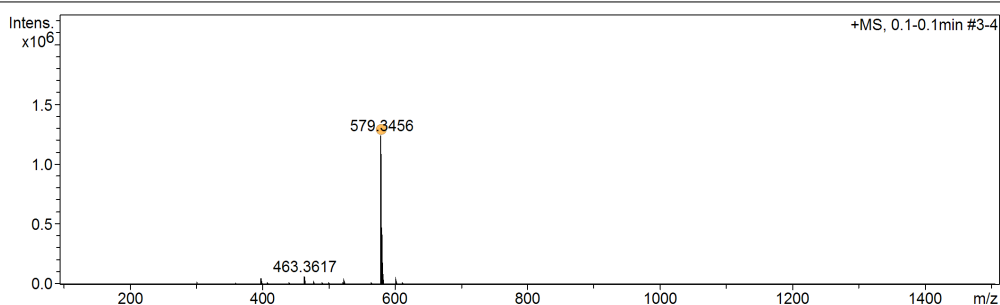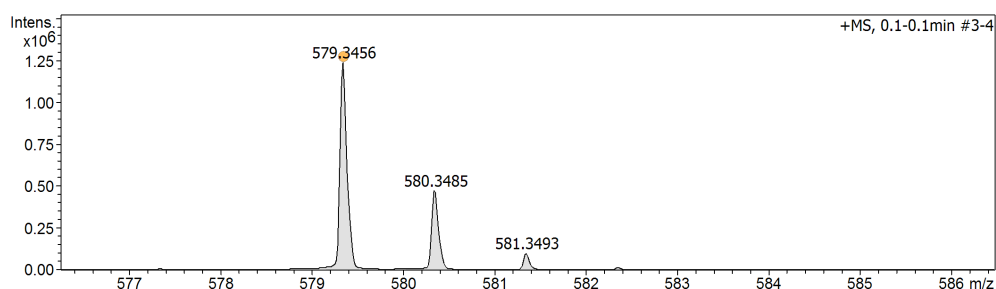

| Meas. m/z | # | Ion Formula | m/z      | err [ppm] | mSigma | # Sigma | Score  | rdb  | e <sup>-</sup> Conf | N-Rule |
|-----------|---|-------------|----------|-----------|--------|---------|--------|------|---------------------|--------|
| 579.3456  | 1 | C33H47N4O5  | 579.3541 | -14.6     | 1.8    | 1       | 0.01   | 12.5 | even                | ok     |
|           | 2 | C34H47N2O6  | 579.3429 | -4.8      | 2.0    | 2       | 41.79  | 12.5 | even                | ok     |
|           | 3 | C31H39N12   | 579.3415 | -7.1      | 4.4    | 3       | 9.52   | 18.5 | even                | ok     |
|           | 4 | C34H43N8O   | 579.3554 | -16.9     | 10.0   | 4       | 0.00   | 17.5 | even                | ok     |
|           | 5 | C30H43N8O4  | 579.3402 | -9.4      | 11.9   | 5       | 1.34   | 13.5 | even                | ok     |
|           | 6 | C35H43N6O2  | 579.3442 | 2.5       | 12.1   | 6       | 100.00 | 17.5 | even                | ok     |
|           | 7 | C32H51O9    | 579.3528 | 12.3      | 13.5   | 7       | 0.08   | 7.5  | even                | ok     |
|           | 8 | C29H43N10O3 | 579.3514 | 10.0      | 14.4   | 8       | 0.80   | 13.5 | even                | ok     |

**Figure S16.** HRMS spectrum of noonindole A (5)

## 5 Noonindole B (6)

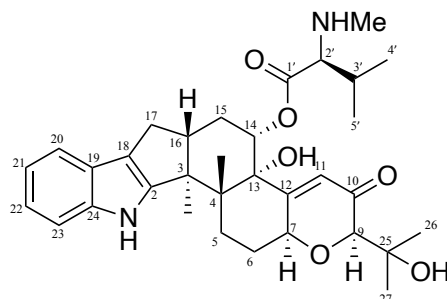

**Table S3.** 1D and 2D NMR (methanol- $d_4$ , 600 MHz) data for noonindole B (6)

| Pos. | $\delta_H$ , mult. ( $J$ in Hz)                                                          | $\delta_C$ | COSY                           | $^1H$ - $^{13}C$ HMBC                  | ROESY        |
|------|------------------------------------------------------------------------------------------|------------|--------------------------------|----------------------------------------|--------------|
| 1-NH | -                                                                                        | -          | -                              | -                                      | -            |
| 2    | -                                                                                        | 152.3      | -                              | -                                      | -            |
| 3    | -                                                                                        | 51.9       | -                              | -                                      | -            |
| 4    | -                                                                                        | 46.2       | -                              | -                                      | -            |
| 5    | $a$ 2.88 (ddd, 1H, $J = 13.5, 13.5, 5.1$ Hz)<br>$b$ 1.83 (br dd, 1H, $J = 13.5, 5.1$ Hz) | 28.0       | $5b, 6a, 6b$<br>$5a, 6a, 6b$   | 3, 4, 6, 13, 4-Me<br>4, 6, 7, 13, 4-Me | 3-Me<br>-    |
| 6    | $a$ 2.39 (m, 1H)<br>$b$ 1.93 (m, 1H)                                                     | 30.5       | $5a, 6b, 7$<br>$5a, 5b, 6a, 7$ | 5, 7, 4, 12<br>4, 5, 7                 | -            |
| 7    | 4.90 (m, 1H)                                                                             | 74.8       | 6, 9, 11                       | 6, 11, 12                              | -            |
| 9    | 3.72 (d, 1H, $J = 1.5$ Hz)                                                               | 83.9       | 7                              | 7, 25, 26, 27                          | 26, 27       |
| 10   | -                                                                                        | 198.1      | -                              | -                                      | -            |
| 11   | 5.57 (d, 1H, $J = 1.5$ Hz)                                                               | 122.0      | 7                              | 7, 9, 13                               | -            |
| 12   | -                                                                                        | 165.8      | -                              | -                                      | -            |
| 13   | -                                                                                        | 80.0       | -                              | -                                      | -            |
| 14   | 5.50 (dd, 1H, $J = 10.4, 5.0$ Hz)                                                        | 77.3       | 15a, 15b                       | 15, 1'                                 | 16, 4-Me     |
| 15   | $a$ 2.25 (dd, 1H, $J = 13.0, 10.4$ Hz)<br>$b$ 2.17 (m, 1H)                               | 28.3       | 14, 15b, 16<br>14, 15a, 16     | 3, 13, 14, 16<br>3, 13, 14, 16         | 3-Me<br>-    |
| 16   | 2.98 (m, 1H)                                                                             | 47.5       | 15a, 17a, 17b                  | 14, 17, 3-Me, 3                        | 14, 4-Me     |
| 17   | $a$ 2.74 (dd, 1H, $J = 13.1, 6.3$ Hz)<br>$b$ 2.47 (dd, 1H, $J = 13.1, 11.1$ Hz)          | 27.6       | 16, 17b<br>16, 17a             | 2, 3, 16, 18<br>2, 15, 16, 18          | 3-Me<br>-    |
| 18   | -                                                                                        | 117.3      | -                              | -                                      | -            |
| 19   | -                                                                                        | 126.0      | -                              | -                                      | -            |
| 20   | 7.30 (d, 1H, $J = 7.9$ Hz)                                                               | 118.8      | 21                             | 18, 22, 24                             | -            |
| 21   | 6.93 (br dd, 1H, $J = 7.9, 7.7$ Hz)                                                      | 119.9      | 20, 22                         | 19, 23                                 | -            |
| 22   | 6.97 (ddd, 1H, $J = 7.9, 7.9, 0.9$ Hz)                                                   | 121.1      | 21, 23                         | 20, 24                                 | -            |
| 23   | 7.28 (d, 1H, $J = 7.9$ Hz)                                                               | 112.7      | 22                             | 19, 21                                 | -            |
| 24   | -                                                                                        | 141.9      | -                              | -                                      | -            |
| 25   | -                                                                                        | 73.0       | -                              | -                                      | -            |
| 26   | 1.28 (s, 3H)                                                                             | 25.3       | -                              | 9, 25, 27                              | 9            |
| 27   | 1.26 (s, 3H)                                                                             | 26.4       | -                              | 9, 25, 26                              | 9            |
| 1'   | -                                                                                        | 168.9      | -                              | -                                      | -            |
| 2'   | 3.90 (br s, 1H)                                                                          | 68.7       | 3'                             | -                                      | -            |
| 3'   | 2.31 (m, 1H)                                                                             | 30.7       | 2', 4', 5'                     | -                                      | -            |
| 4'   | 1.09 (br d, 1H, $J = 5.3$ Hz)                                                            | 18.7       | 3'                             | 2', 3', 5'                             | -            |
| 5'   | 0.99 (d, 1H, $J = 7.0$ Hz)                                                               | 17.7       | 3'                             | 2', 3', 4'                             | -            |
| 3-Me | 1.37 (s, 3H)                                                                             | 16.6       | -                              | 2, 3, 4, 16                            | 5a, 15a, 17a |
| 4-Me | 1.10 (s, 3H)                                                                             | 19.5       | -                              | 3, 4, 5, 13                            | 16, 14       |
| NMe  | 2.72 (s, 3H)                                                                             | 33.8       | -                              | 2'                                     | -            |

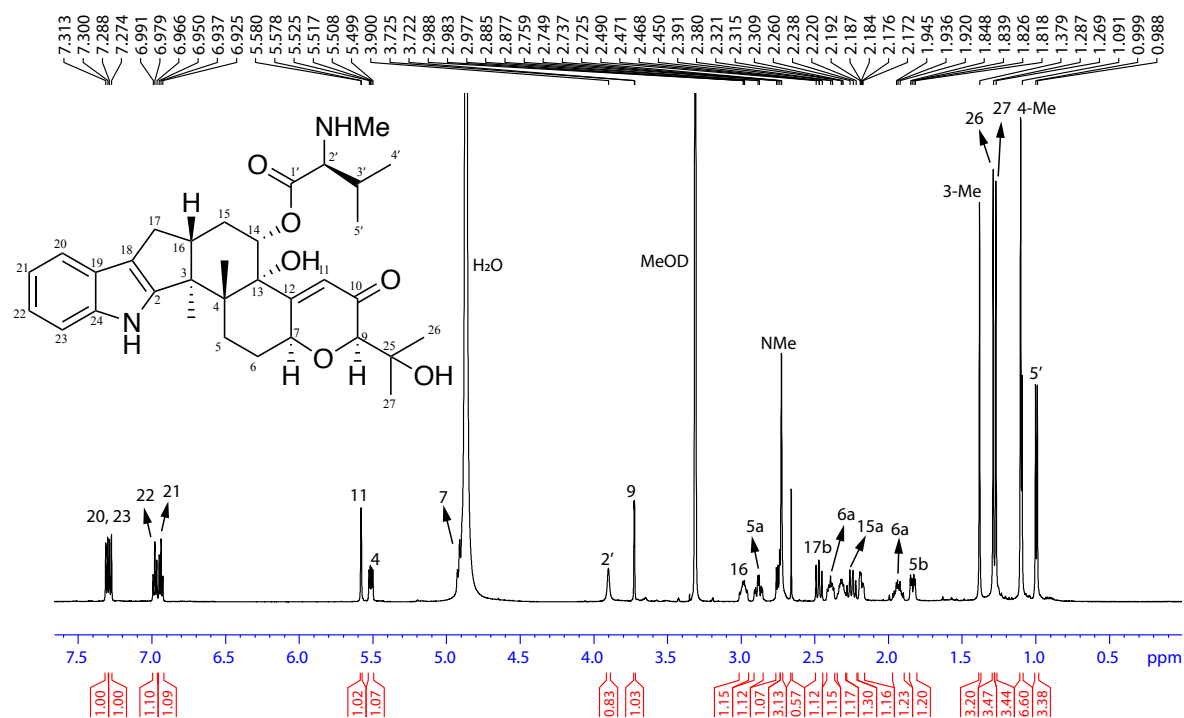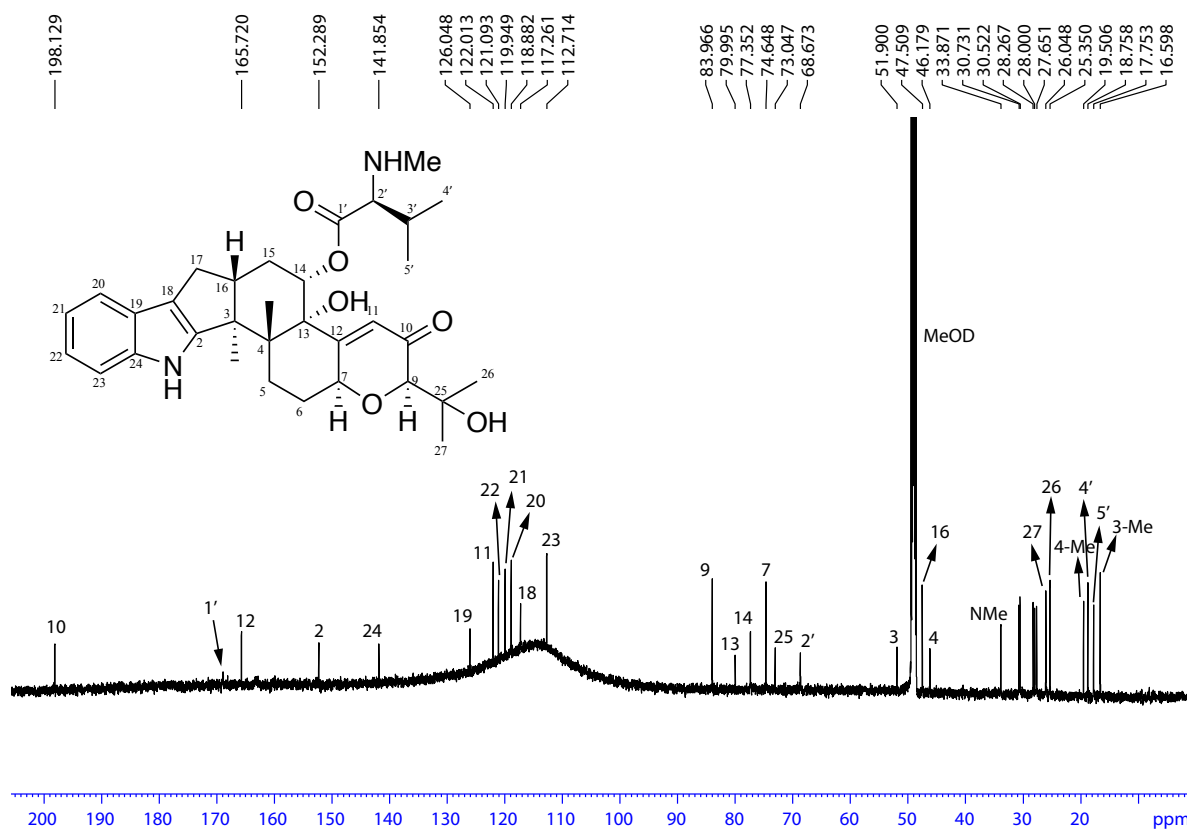

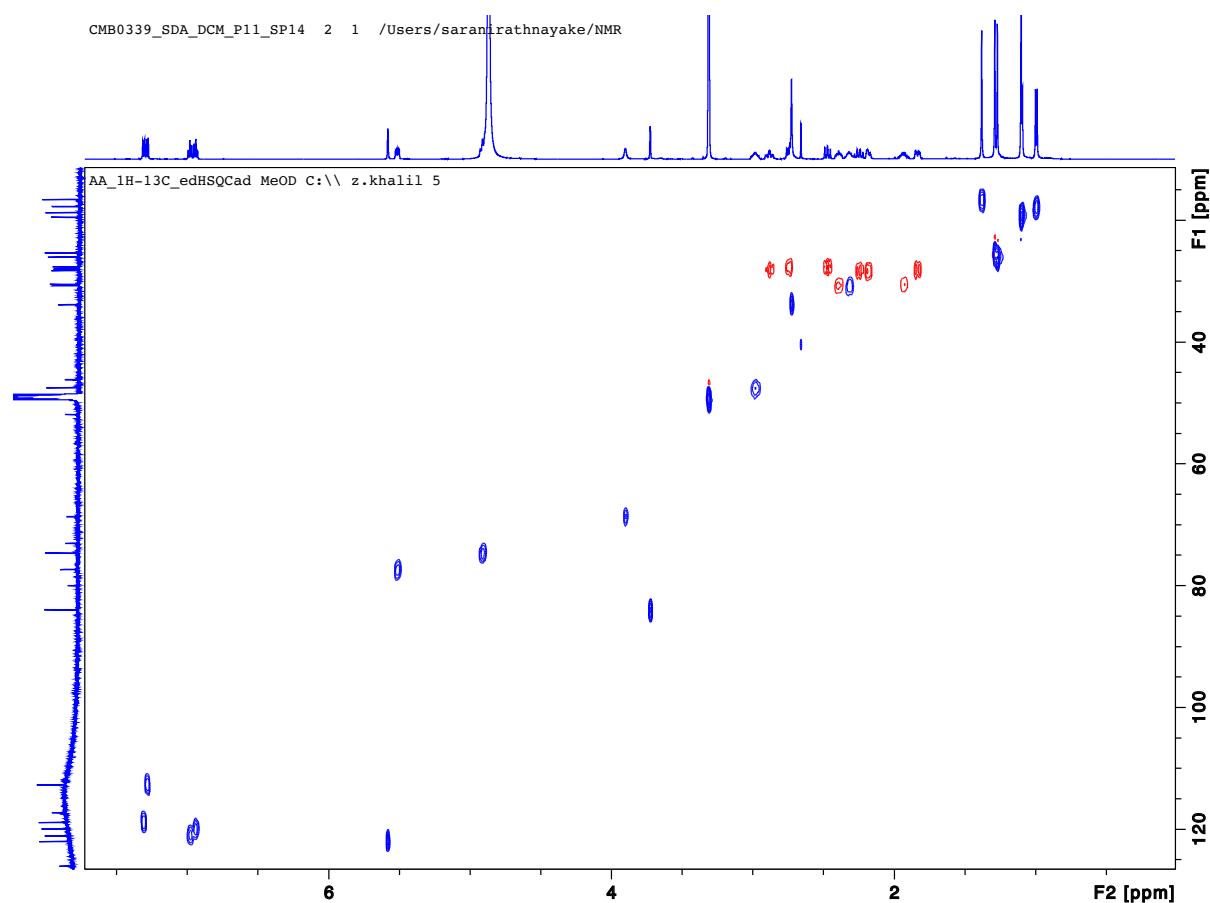

**Figure S19.** HSQC (methanol- $d_4$ ) spectrum of noonindole B (6)

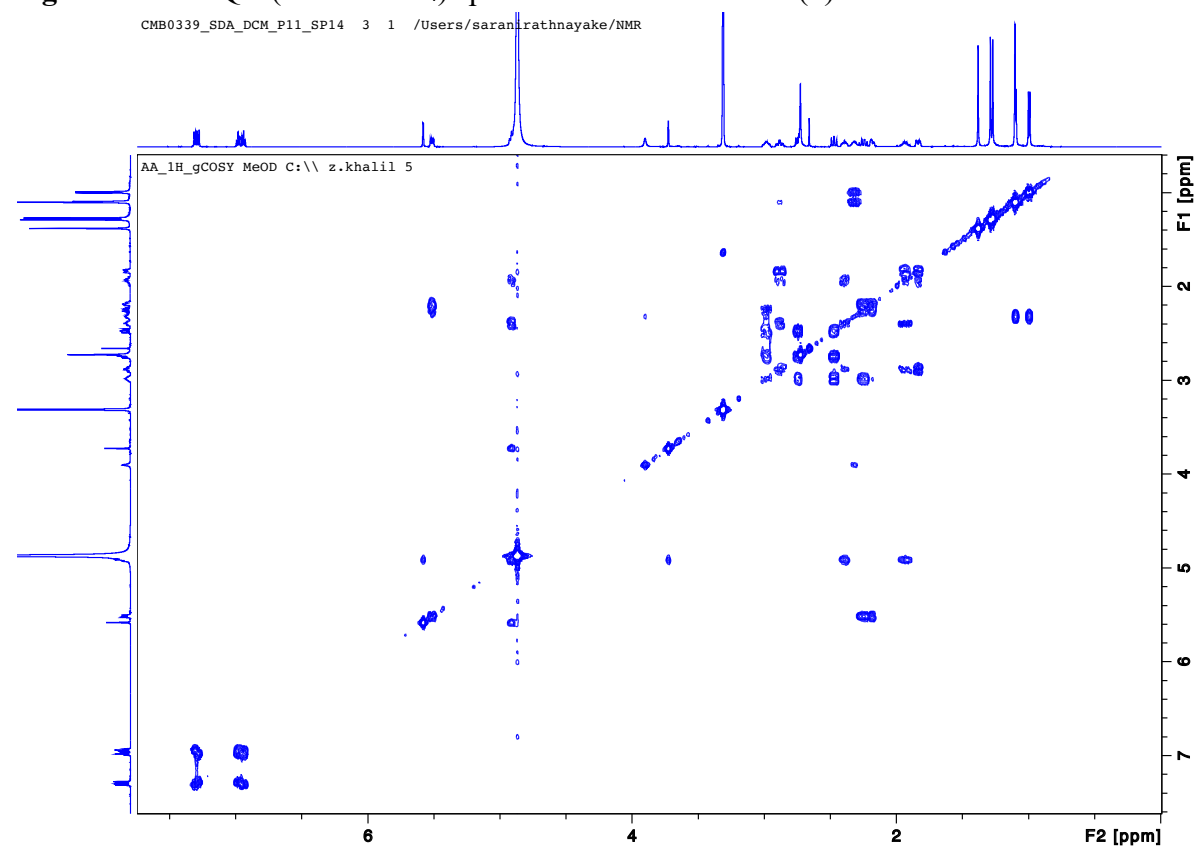

**Figure S20.** COSY (methanol- $d_4$ ) spectrum of noonindole B (6)



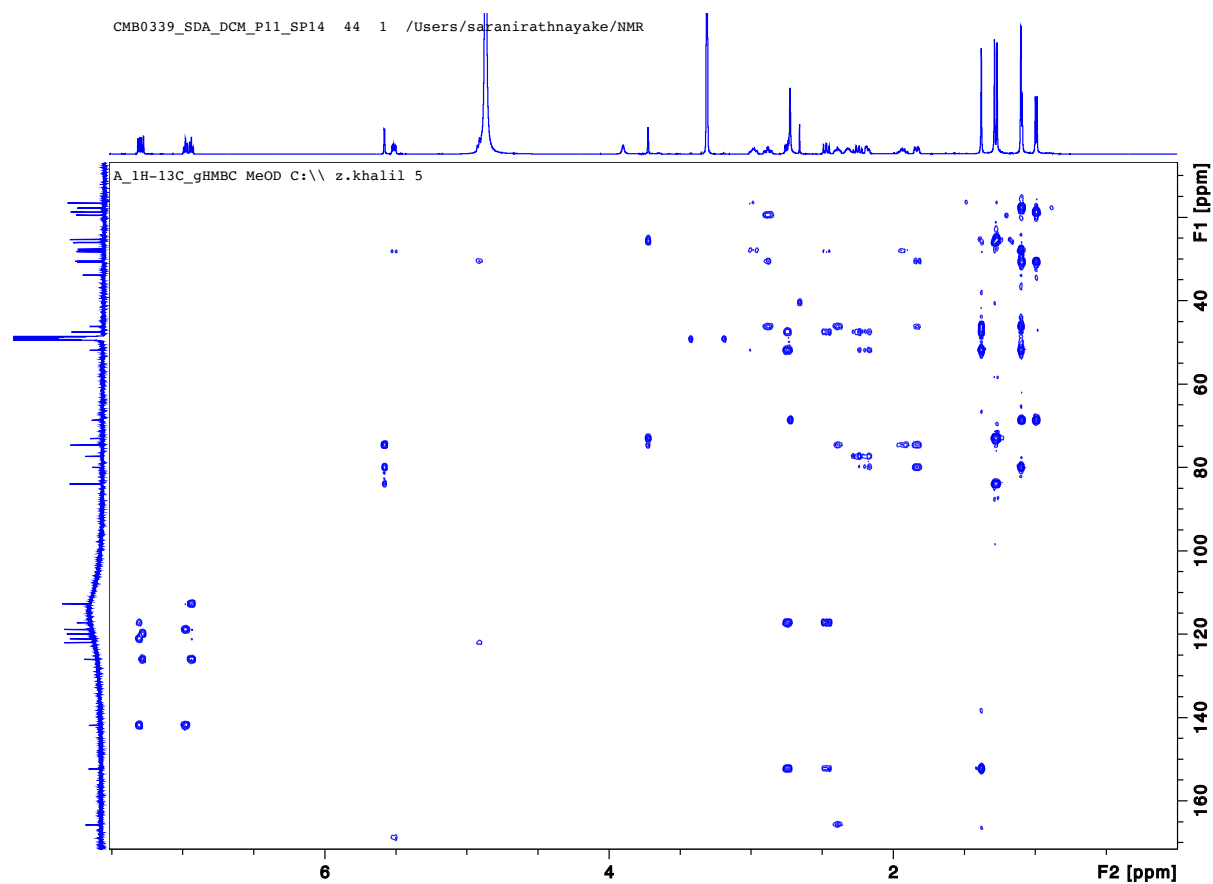

**Figure S21.** HMBC (methanol- $d_4$ ) spectrum of noonindole B (6)

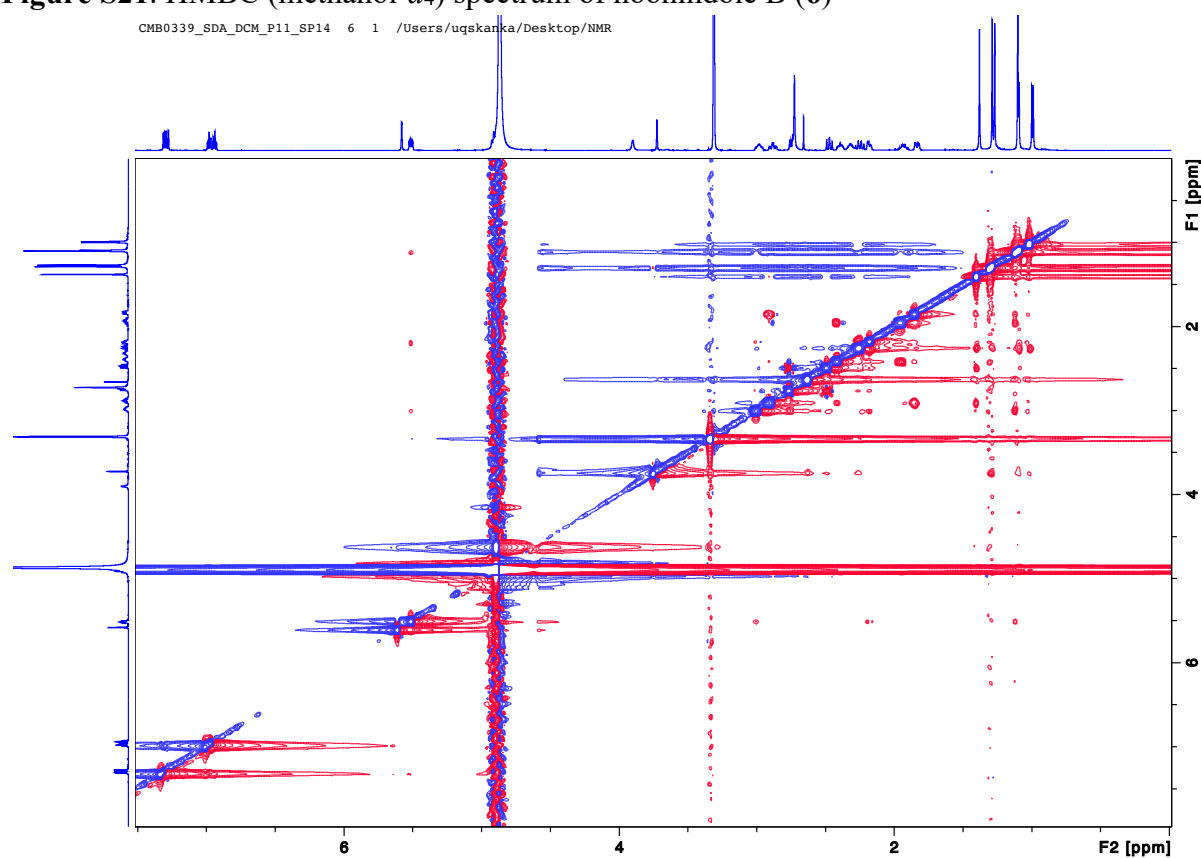

**Figure S22.** ROESY (methanol- $d_4$ ) spectrum of noonindole B (6)

## Mass Spectrum Molecular Formula Report

### Analysis Info

Analysis Name D:\Data\s.kankaname\CMB0339\_SDA\_P11\_SP14\_E.d  
 Method tune-med\_AP.m  
 Sample Name CMB0339\_SDA\_P11\_SP14\_E  
 Comment

Acquisition Date 8/4/2022 12:03:32 PM

Operator a.salim  
 Instrument / Ser# micrOTOF 213750.00  
 232

### Acquisition Parameter

|             |            |                      |          |                  |           |
|-------------|------------|----------------------|----------|------------------|-----------|
| Source Type | ESI        | Ion Polarity         | Positive | Set Nebulizer    | 0.8 Bar   |
| Focus       | Not active |                      |          | Set Dry Heater   | 180 °C    |
| Scan Begin  | 100 m/z    | Set Capillary        | 4500 V   | Set Dry Gas      | 5.0 l/min |
| Scan End    | 1000 m/z   | Set End Plate Offset | -500 V   | Set Divert Valve | Source    |

### Generate Molecular Formula Parameter

|                  |                        |         |
|------------------|------------------------|---------|
| Formula, min.    |                        |         |
| Formula, max.    |                        |         |
| Measured m/z     | Tolerance              | Charge  |
| Check Valence    | Minimum                | Maximum |
| Nitrogen Rule    | Electron Configuration |         |
| Filter H/C Ratio | Minimum                | Maximum |
| Estimate Carbon  |                        |         |

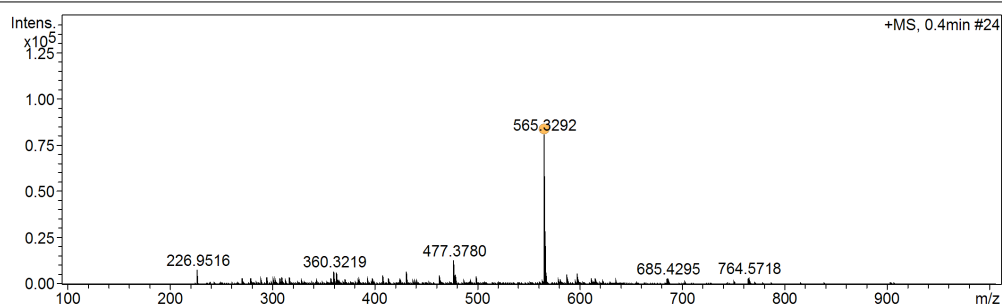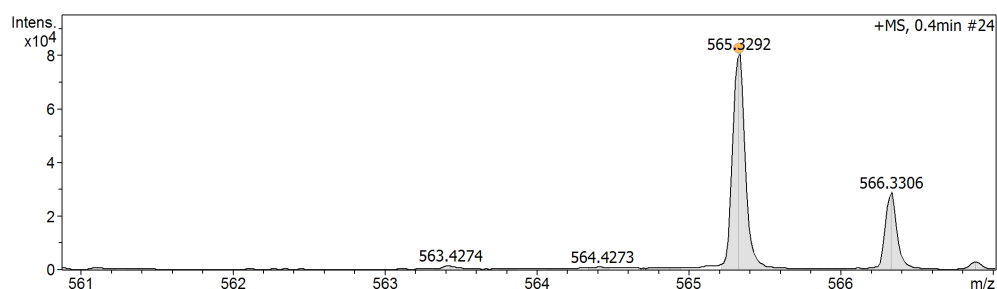

| Meas. m/z | # | Ion Formula | m/z      | err [ppm] | mSigma | # Sigma | Score  | rdb  | e <sup>-</sup> Conf | N-Rule |
|-----------|---|-------------|----------|-----------|--------|---------|--------|------|---------------------|--------|
| 565.3292  | 1 | C33H45N2O6  | 565.3272 | 3.5       | 7.0    | 1       | 53.94  | 12.5 | even                | ok     |
|           | 2 | C34H41N6O2  | 565.3286 | 1.1       | 18.5   | 2       | 100.00 | 17.5 | even                | ok     |
|           | 3 | C38H45O4    | 565.3312 | 3.6       | 30.9   | 3       | 30.65  | 16.5 | even                | ok     |

**Figure S23.** HRMS spectrum of noonindole B (6)

## 6 Noonindole C (7)

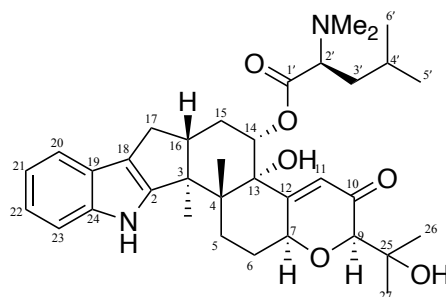

**Table S4.1D** and 2D NMR (in methanol-*d*<sub>4</sub>, 600 MHz) data for noonindole C (7)

| Pos.             | $\delta_{\text{H, mult.}}$ ( <i>J</i> in Hz)                                                                 | $\delta_{\text{C}}$ | COSY                                                                         | $^1\text{H}$ - $^{13}\text{C}$ HMBC | ROESY                          |
|------------------|--------------------------------------------------------------------------------------------------------------|---------------------|------------------------------------------------------------------------------|-------------------------------------|--------------------------------|
| 1-NH             | -                                                                                                            | -                   | -                                                                            | -                                   | -                              |
| 2                | -                                                                                                            | 152.2               | -                                                                            | -                                   | -                              |
| 3                | -                                                                                                            | 51.8                | -                                                                            | -                                   | -                              |
| 4                | -                                                                                                            | 46.2                | -                                                                            | -                                   | -                              |
| 5                | <i>a</i> 2.87 (ddd, 1H, <i>J</i> = 13.8, 13.8, 5.4 Hz)<br><i>b</i> 1.84 (br dd, 1H, <i>J</i> = 13.8, 5.4 Hz) | 27.9                | 5 <i>b</i> , 6 <i>a</i> , 6 <i>b</i><br>5 <i>a</i> , 6 <i>a</i> , 6 <i>b</i> | 4, 6, 4-Me<br>4, 6, 7, 4-Me, 13     | -<br>-                         |
| 6                | <i>a</i> 2.39 (m, 1H)<br><i>b</i> 1.93 (m, 1H)                                                               | 30.5                | 5 <i>a</i> , 6 <i>b</i> , 7<br>5 <i>a</i> , 6 <i>a</i> , 6 <i>b</i> , 7      | 7, 4, 12<br>4, 5, 7                 | -<br>-                         |
| 7                | 4.92 (br t, 1H, <i>J</i> = 8.5 Hz)                                                                           | 74.8                | 6, 9, 11                                                                     | 6, 11                               | 9                              |
| 9                | 3.71 (br s, 1H)                                                                                              | 84.0                | 7                                                                            | 7, 25, 26                           | 7                              |
| 10               | -                                                                                                            | 197.9               | -                                                                            | -                                   | -                              |
| 11               | 5.57 (d, 1H, <i>J</i> = 1.9 Hz)                                                                              | 121.8               | 7                                                                            | 7, 9, 13                            | -                              |
| 12               | -                                                                                                            | 165.0               | -                                                                            | -                                   | -                              |
| 13               | -                                                                                                            | 80.1                | -                                                                            | -                                   | -                              |
| 14               | 5.51 (dd, 1H, <i>J</i> = 10.4, 5.1 Hz)                                                                       | 77.5                | 15 <i>a</i> , 15 <i>b</i>                                                    | 1'                                  | 4-Me, 16                       |
| 15               | <i>a</i> 2.25 (dd, 1H, <i>J</i> = 13.2, 10.4 Hz)<br><i>b</i> 2.20 (m, 1H)                                    | 28.1                | 14, 15 <i>b</i> , 16<br>14, 15 <i>a</i> , 16                                 | 3, 14, 16<br>3, 14, 13, 16          | 3-Me<br>-                      |
| 16               | 2.97 (m, 1H)                                                                                                 | 47.5                | 15, 17 <i>b</i>                                                              | 15                                  | 4-Me, 14                       |
| 17               | <i>a</i> 2.74 (dd, 1H, <i>J</i> = 13.0, 6.3 Hz)<br><i>b</i> 2.47 (dd, 1H, <i>J</i> = 13.0, 10.8 Hz)          | 27.6                | 16, 17 <i>b</i><br>16, 17 <i>a</i>                                           | 2, 3, 16, 18<br>2, 16, 18           | 3-Me<br>-                      |
| 18               | -                                                                                                            | 117.2               | -                                                                            | -                                   | -                              |
| 19               | -                                                                                                            | 126.1               | -                                                                            | -                                   | -                              |
| 20               | 7.30 (d, 1H, <i>J</i> = 7.8 Hz)                                                                              | 118.9               | 21                                                                           | 18, 22, 24                          | -                              |
| 21               | 6.93 (ddd, 1H, <i>J</i> = 7.8, 7.8, 1.1 Hz)                                                                  | 119.9               | 20, 22                                                                       | 19, 23                              | -                              |
| 22               | 6.98 (ddd, 1H, <i>J</i> = 7.8, 7.8, 1.1 Hz)                                                                  | 121.1               | 21, 23                                                                       | 20, 24                              | -                              |
| 23               | 7.28 (d, 1H, <i>J</i> = 7.8 Hz)                                                                              | 112.7               | 22                                                                           | 19, 21                              | -                              |
| 24               | -                                                                                                            | 141.9               | -                                                                            | -                                   | -                              |
| 25               | -                                                                                                            | 73.0                | -                                                                            | -                                   | -                              |
| 26               | 1.30 (s, 3H)                                                                                                 | 25.5                | -                                                                            | 9, 25, 27                           | -                              |
| 27               | 1.27 (s, 3H)                                                                                                 | 25.8                | -                                                                            | 9, 25, 26                           | -                              |
| 1'               | -                                                                                                            | 168.9               | -                                                                            | -                                   | -                              |
| 2'               | 4.02 (m, 1H)                                                                                                 | 67.5                | 3'                                                                           | -                                   | 6'                             |
| 3'               | <i>a</i> 1.90 (m, 1H)<br><i>b</i> 1.69, (m, 1H)                                                              | 37.4                | 2', 3' <i>b</i> , 4'<br>2', 3' <i>a</i> , 4'                                 | 4'<br>-                             | 5'<br>5', 6', NMe <sub>2</sub> |
| 4'               | 1.56 (m, 1H)                                                                                                 | 26.2                | 3', 5', 6'                                                                   | -                                   | -                              |
| 5'               | 0.97 (d, 3H, <i>J</i> = 6.4 Hz)                                                                              | 23.4                | 4'                                                                           | 3', 4', 6'                          | 3' <i>b</i> , 3' <i>a</i>      |
| 6'               | 0.91 (d, 3H, <i>J</i> = 6.4 Hz)                                                                              | 21.4                | 4'                                                                           | 3', 4', 5'                          | 2', 3' <i>b</i>                |
| 3-Me             | 1.38 (s, 3H)                                                                                                 | 16.6                | -                                                                            | 2, 3, 4, 16                         | 17 <i>a</i> , 15 <i>a</i>      |
| 4-Me             | 1.09 (br s, 3H)                                                                                              | 19.4                | -                                                                            | 3, 4, 5, 13                         | 14, 16                         |
| NMe <sub>2</sub> | 2.93 (s, 6H)                                                                                                 | 42.1                | -                                                                            | 2', NMe <sub>2</sub>                | 3' <i>b</i>                    |

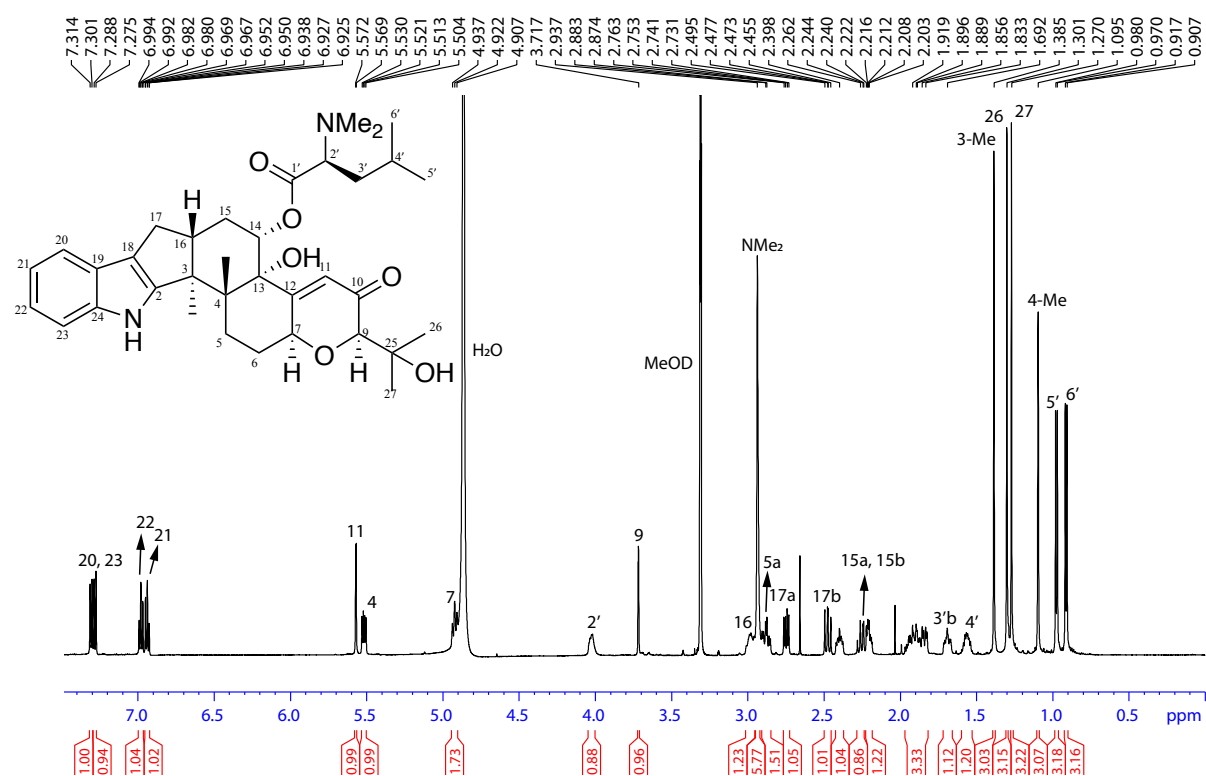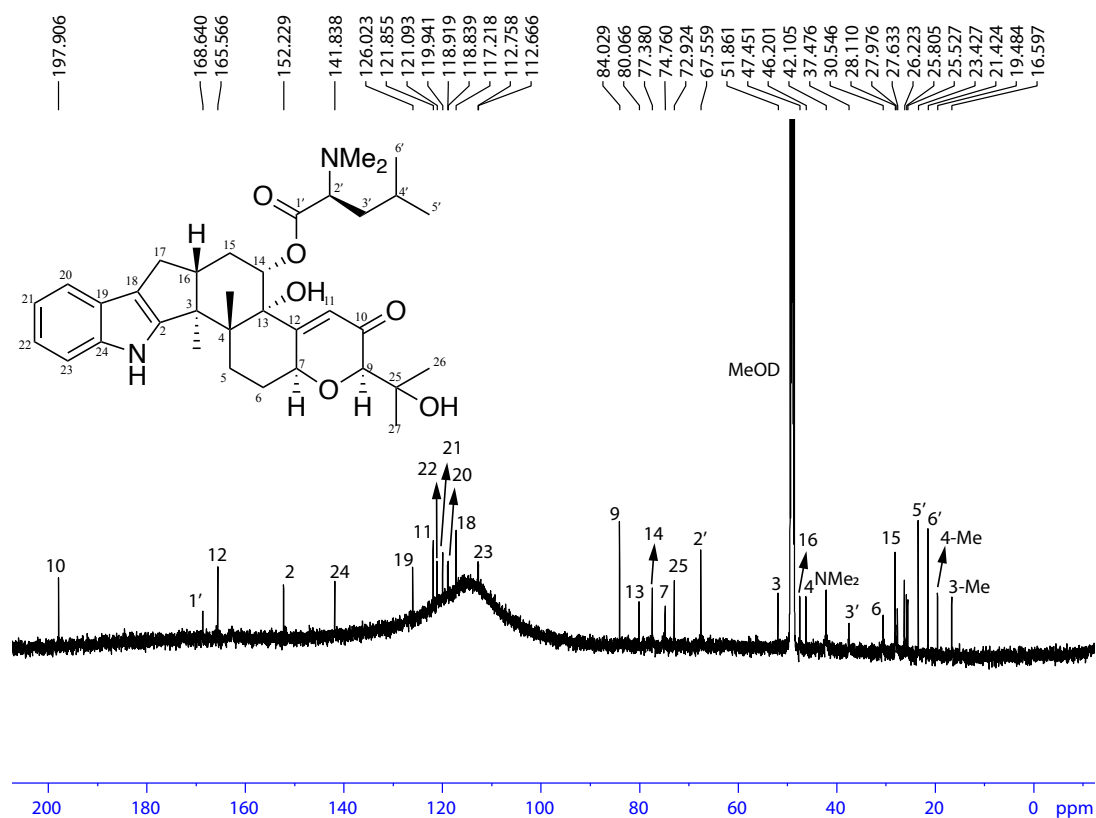

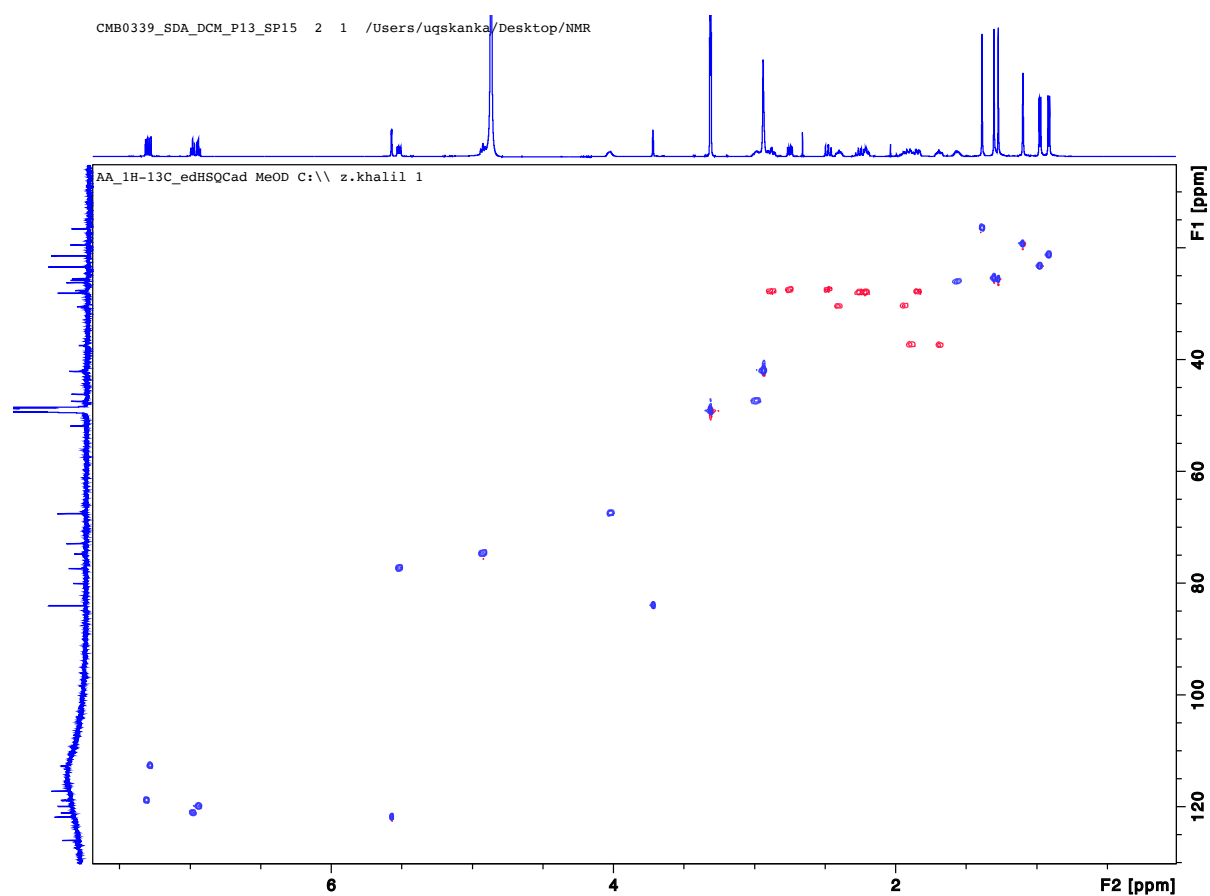

Figure S26. HSQC (methanol- $d_4$ ) spectrum of noonindole C (7)

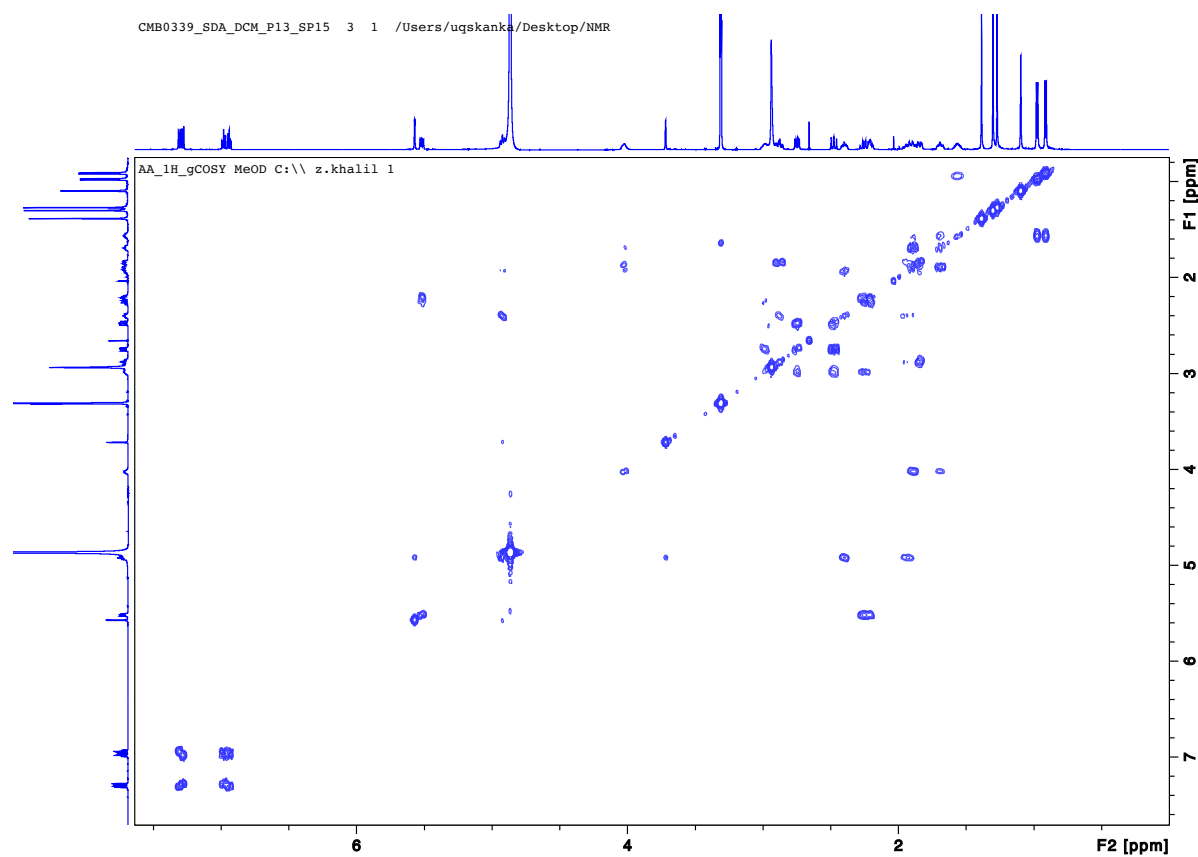

Figure S27. COSY (methanol- $d_4$ ) spectrum of noonindole C (7)

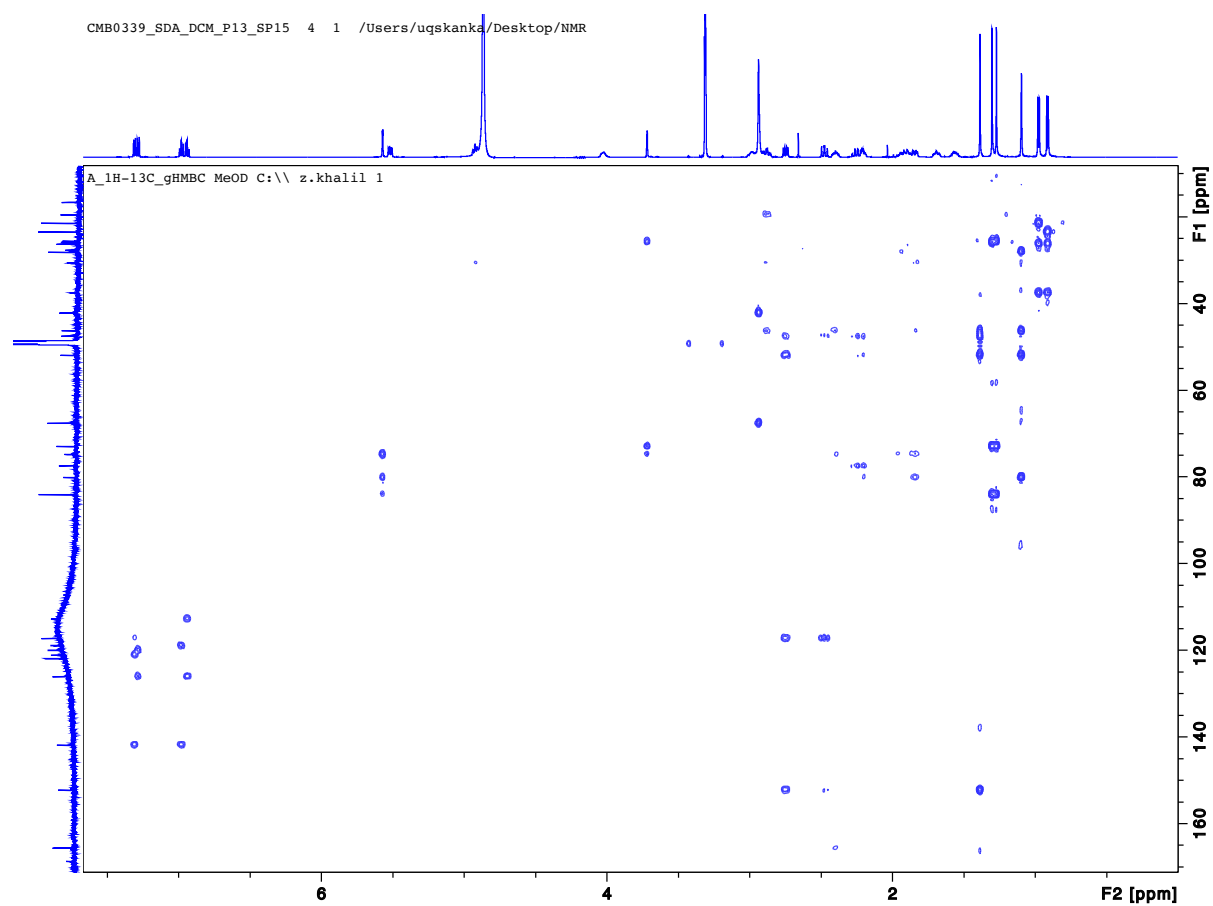

**Figure S28.** HMBC (methanol- $d_4$ ) spectrum of noonindole C (7)

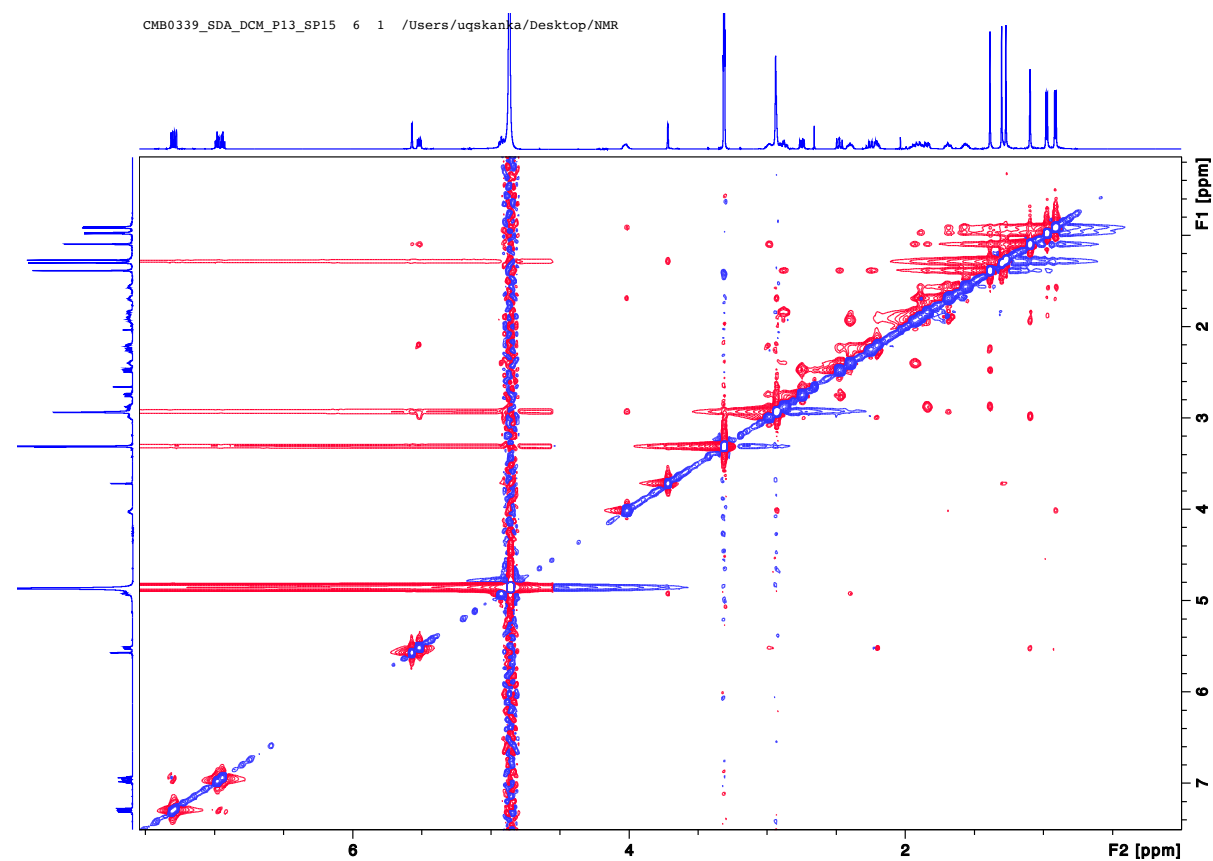

**Figure S29.** ROESY (methanol- $d_4$ ) spectrum of noonindole C (7)

## Mass Spectrum Molecular Formula Report

### Analysis Info

|               |                                                  |                   |                       |
|---------------|--------------------------------------------------|-------------------|-----------------------|
| Analysis Name | D:\Data\s.kankaname\CMB0339_SDA_DCM_P13_SP15_2.d | Acquisition Date  | 10/27/2020 3:48:30 PM |
| Method        | tune-medhigh_AP.m                                | Operator          | a.salim               |
| Sample Name   | CMB0339_SDA_DCM_P13_SP15_2                       | Instrument / Ser# | micrOTOF 213750.00    |
| Comment       |                                                  |                   | 232                   |

### Acquisition Parameter

|             |            |                      |           |
|-------------|------------|----------------------|-----------|
| Source Type | ESI        | Ion Polarity         | Positive  |
| Focus       | Not active | Set Nebulizer        | 0.5 Bar   |
| Scan Begin  | 100 m/z    | Set Dry Heater       | 180 °C    |
| Scan End    | 1500 m/z   | Set Dry Gas          | 5.0 l/min |
|             |            | Set End Plate Offset | -500 V    |
|             |            | Set Divert Valve     | Source    |

### Generate Molecular Formula Parameter

|                  |                        |         |
|------------------|------------------------|---------|
| Formula, min.    | Tolerance              | Charge  |
| Formula, max.    | Minimum                | Maximum |
| Measured m/z     | Electron Configuration |         |
| Check Valence    | Minimum                | Maximum |
| Nitrogen Rule    |                        |         |
| Filter H/C Ratio |                        |         |
| Estimate Carbon  |                        |         |

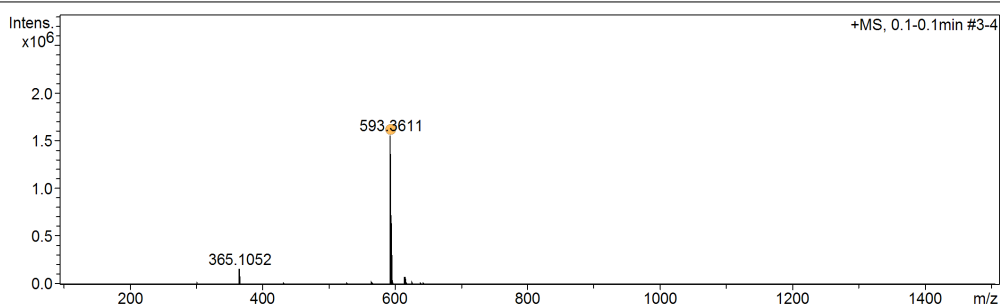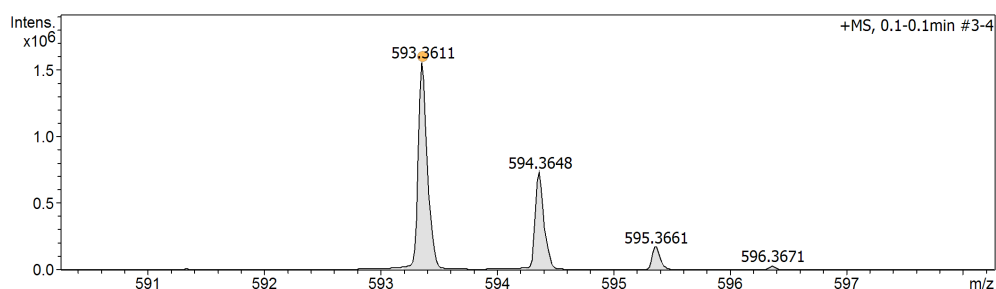

| Meas. m/z | # | Ion Formula | m/z      | err [ppm] | mSigma | # Sigma | Score  | rdb  | e <sup>-</sup> Conf | N-Rule |
|-----------|---|-------------|----------|-----------|--------|---------|--------|------|---------------------|--------|
| 593.3611  | 1 | C41H45N4    | 593.3639 | -4.6      | 2.7    | 1       | 43.33  | 21.5 | even                | ok     |
|           | 2 | C40H49O4    | 593.3625 | 2.4       | 14.0   | 2       | 100.00 | 16.5 | even                | ok     |
|           | 3 | C36H45N6O2  | 593.3599 | -2.2      | 26.8   | 3       | 82.09  | 17.5 | even                | ok     |
|           | 4 | C35H49N2O6  | 593.3585 | -4.4      | 38.1   | 4       | 22.59  | 12.5 | even                | ok     |
|           | 5 | C32H41N12   | 593.3572 | -6.7      | 39.9   | 5       | 5.36   | 18.5 | even                | ok     |
|           | 6 | C31H45N8O4  | 593.3558 | -8.9      | 50.8   | 6       | 0.66   | 13.5 | even                | ok     |
|           | 7 | C33H53O9    | 593.3684 | 12.3      | 51.9   | 7       | 0.02   | 7.5  | even                | ok     |
|           | 8 | C30H45N10O3 | 593.3671 | 10.0      | 53.3   | 8       | 0.23   | 13.5 | even                | ok     |

**Figure S30.** HRMS spectrum of noonindole C (7)

## 7 Noonindole D (8)

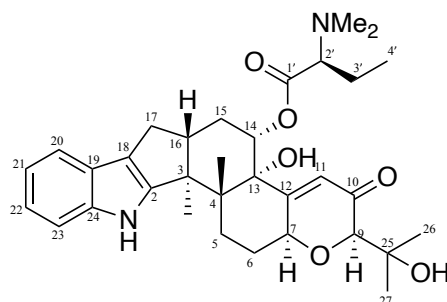

**Table S5.** 1D and 2D NMR (methanol-*d*<sub>4</sub>, 600 MHz) data for noonindole D (8)

| Pos.             | $\delta_{\text{H}}$ , mult. ( <i>J</i> in Hz)                                                       | $\delta_{\text{C}}$ | COSY                                                            | <sup>1</sup> H- <sup>13</sup> C<br>HMBC | ROESY        |
|------------------|-----------------------------------------------------------------------------------------------------|---------------------|-----------------------------------------------------------------|-----------------------------------------|--------------|
| 1-NH             | -                                                                                                   | -                   | -                                                               | -                                       | -            |
| 2                | -                                                                                                   | 151.1               | -                                                               | -                                       | -            |
| 3                | -                                                                                                   | 50.5                | -                                                               | -                                       | -            |
| 4                | -                                                                                                   | 44.6                | -                                                               | -                                       | -            |
| 5                | <i>a</i> 2.87 <sup>a</sup> (m, 1H)<br><i>b</i> 1.80, (m, 1H)                                        | 28.0<br>28.0        | -<br><i>5a</i> <sup>a</sup> , <i>6b</i>                         | -<br>-                                  | -<br>-       |
| 6                | <i>a</i> 2.37 (m, 1H)<br><i>b</i> 1.91 (m, 1H)                                                      | 30.4<br>30.4        | <i>5a</i> <sup>a</sup> , <i>6b</i> , 7<br><i>5b</i> , <i>6a</i> | -<br>-                                  | -<br>-       |
| 7                | 4.90 (m, 1H)                                                                                        | 74.6                | <i>6a</i> , <i>6b</i> , 9, 11                                   | -                                       | -            |
| 9                | 3.71 (d, 1H, <i>J</i> = 1.9 Hz)                                                                     | 83.7                | 7                                                               | 25                                      | 27           |
| 10               | -                                                                                                   | nd                  | -                                                               | -                                       | -            |
| 11               | 5.58 (d, 1H, <i>J</i> = 1.9 Hz)                                                                     | 121.7               | 7                                                               | 7, 9, 13                                | 14           |
| 12               | -                                                                                                   | nd                  | -                                                               | -                                       | -            |
| 13               | -                                                                                                   | 78.9                | -                                                               | -                                       | -            |
| 14               | 5.37 (dd, 1H, <i>J</i> = 10.6, 5.1 Hz)                                                              | 74.4                | 15 <i>a</i> , 15 <i>b</i>                                       | -                                       | 11, 16, 4-Me |
| 15               | <i>a</i> 2.16 (m, 1H)<br><i>b</i> 2.04 (ddd, 1H, <i>J</i> = 7.1, 5.1, 2.3 Hz)                       | 28.4<br>28.4        | 14, 15 <i>b</i> , 16<br>15 <i>a</i> , 14, 16                    | -<br>-                                  | -<br>-       |
| 16               | 2.95 (m, 1H)                                                                                        | 47.0                | 15 <i>a</i> , 17 <i>a</i> , 17 <i>b</i>                         | -                                       | 14, 4-Me     |
| 17               | <i>a</i> 2.72 (dd, 1H, <i>J</i> = 13.1, 6.4 Hz)<br><i>b</i> 2.45 (dd, 1H, <i>J</i> = 13.1, 10.7 Hz) | 27.5<br>27.5        | 16, 17 <i>b</i><br>17 <i>a</i> , 16                             | 2, 3, 18<br>18                          | -<br>-       |
| 18               | -                                                                                                   | 116.8               | -                                                               | -                                       | -            |
| 19               | -                                                                                                   | 124.7               | -                                                               | -                                       | -            |
| 20               | 7.30 (d, 1H, <i>J</i> = 7.7 Hz)                                                                     | 118.6               | 21                                                              | 18, 22, 24                              | -            |
| 21               | 6.92 (ddd, 1H, <i>J</i> = 7.7, 7.3, 0.9 Hz)                                                         | 119.6               | 20, 22                                                          | 19, 23                                  | -            |
| 22               | 6.97 (ddd, 1H, <i>J</i> = 8.1, 7.3, 0.9 Hz)                                                         | 120.7               | 21, 23                                                          | 20, 24                                  | -            |
| 23               | 7.27 (d, 1H, <i>J</i> = 8.1 Hz)                                                                     | 112.4               | 22                                                              | 19, 21                                  | -            |
| 24               | -                                                                                                   | 140.4               | -                                                               | -                                       | -            |
| 25               | -                                                                                                   | 71.6                | -                                                               | -                                       | -            |
| 26               | 1.28 (s, 3H)                                                                                        | 25.1                | -                                                               | 9, 25, 27                               | -            |
| 27               | 1.26 (s, 3H)                                                                                        | 25.9                | -                                                               | 9, 25, 26                               | 9            |
| 1'               | -                                                                                                   | nd                  | -                                                               | -                                       | -            |
| 2'               | 2.87 <sup>a</sup> (m, 1H)                                                                           | 72.9                | -                                                               | -                                       | -            |
| 3'               | <i>a</i> 1.77 (m, 1H)<br><i>b</i> 1.69 (m, 1H)                                                      | 23.8                | 2' <sup>a</sup> , 4'<br>2' <sup>a</sup> , 4'                    | -<br>-                                  | -<br>-       |
| 4'               | 0.91 (t, 1H, <i>J</i> = 7.4 Hz)                                                                     | 10.1                | 3' <i>a</i> , 3' <i>b</i>                                       | 2', 3'                                  | -            |
| 3-Me             | 1.37 (s, 3H)                                                                                        | 16.3                | -                                                               | 2, 3, 4, 16                             | -            |
| 4-Me             | 1.08 (s, 3H)                                                                                        | 19.4                | -                                                               | 3, 4, 5, 13                             | 14, 16       |
| NMe <sub>2</sub> | 2.26 (s, 6H)                                                                                        | 43.4                | -                                                               | 2', NMe <sub>2</sub>                    | -            |

<sup>nd</sup> not detected

<sup>a</sup> Resonances with the same superscript within a column are overlapping and assignments may be interchanged



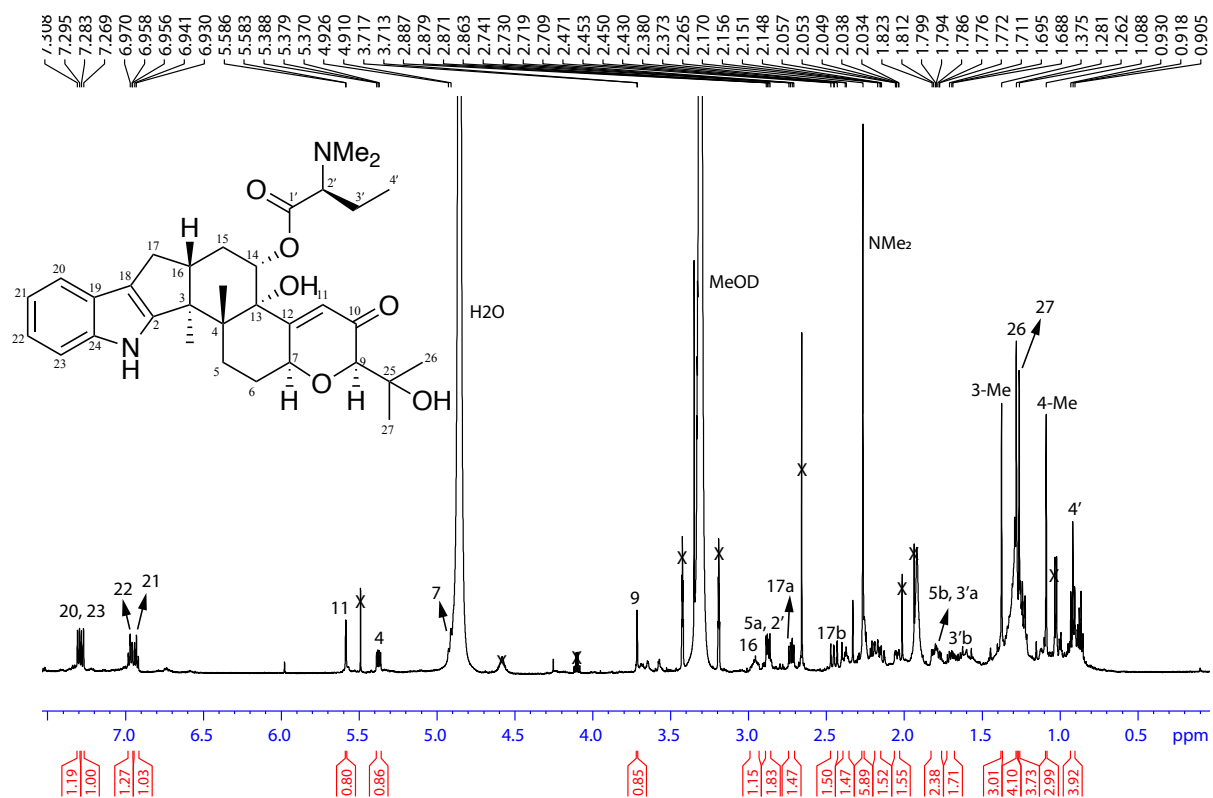

**Figure S31.** <sup>1</sup>H NMR (methanol-*d*<sub>4</sub>) spectrum of noonindole D (8)

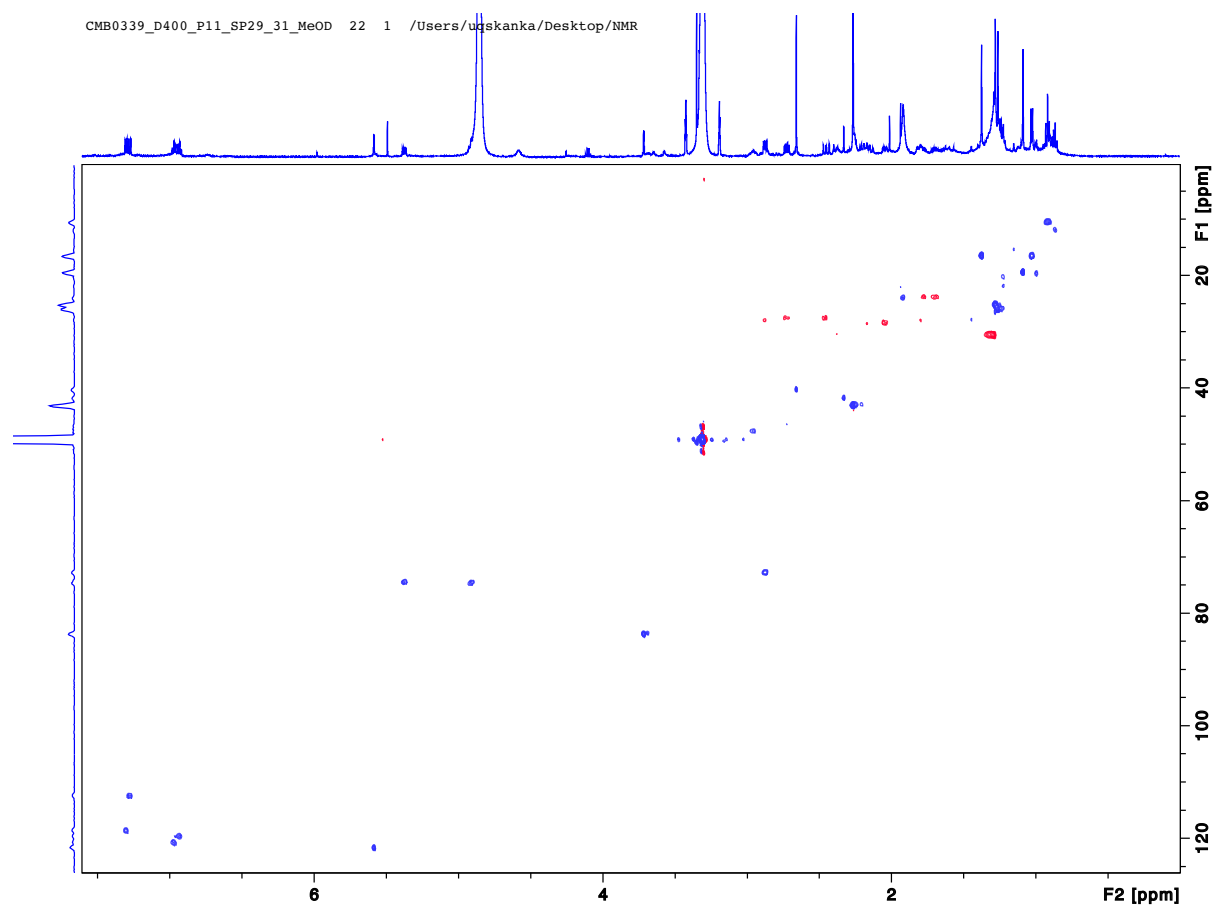

**Figure S32.** HSQC (methanol- $d_4$ ) spectrum of noonindole D (**8**)

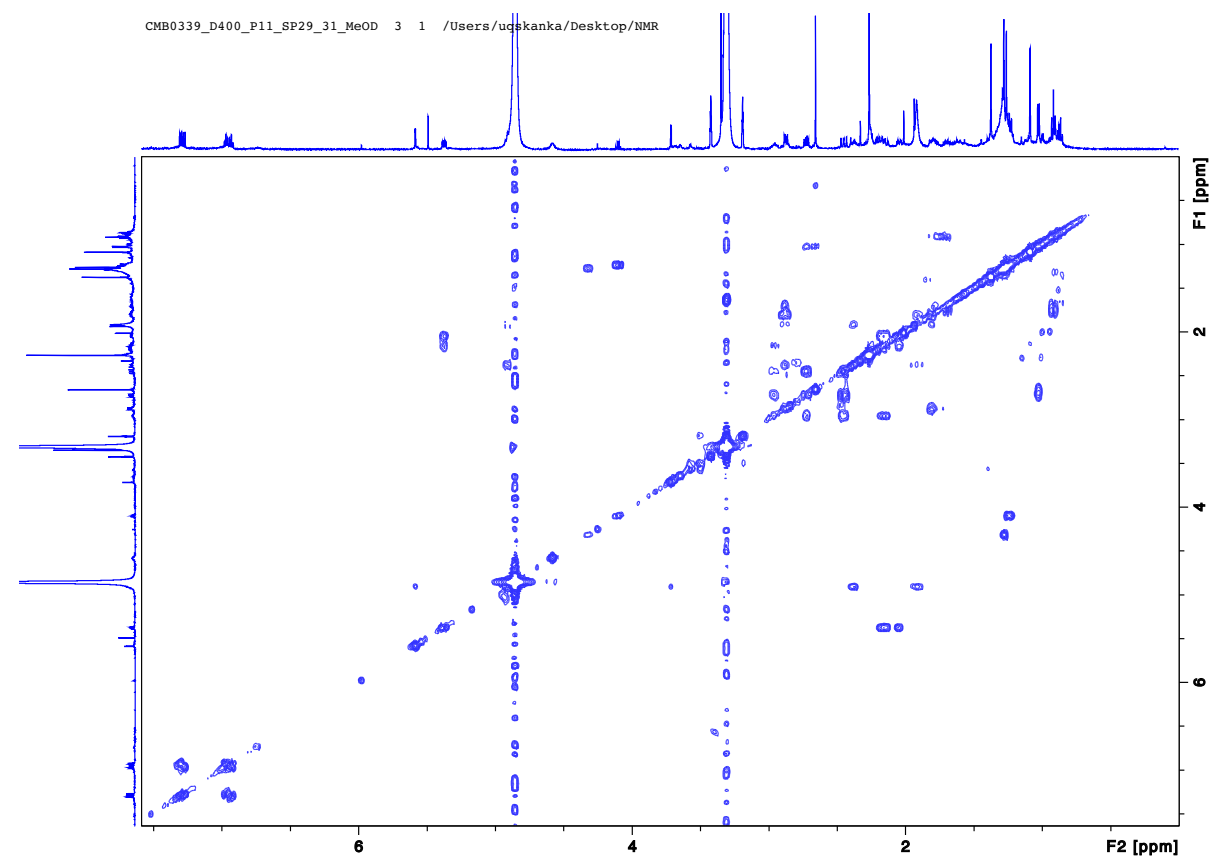

**Figure S33.** COSY (methanol- $d_4$ ) spectrum of noonindole D (**8**)

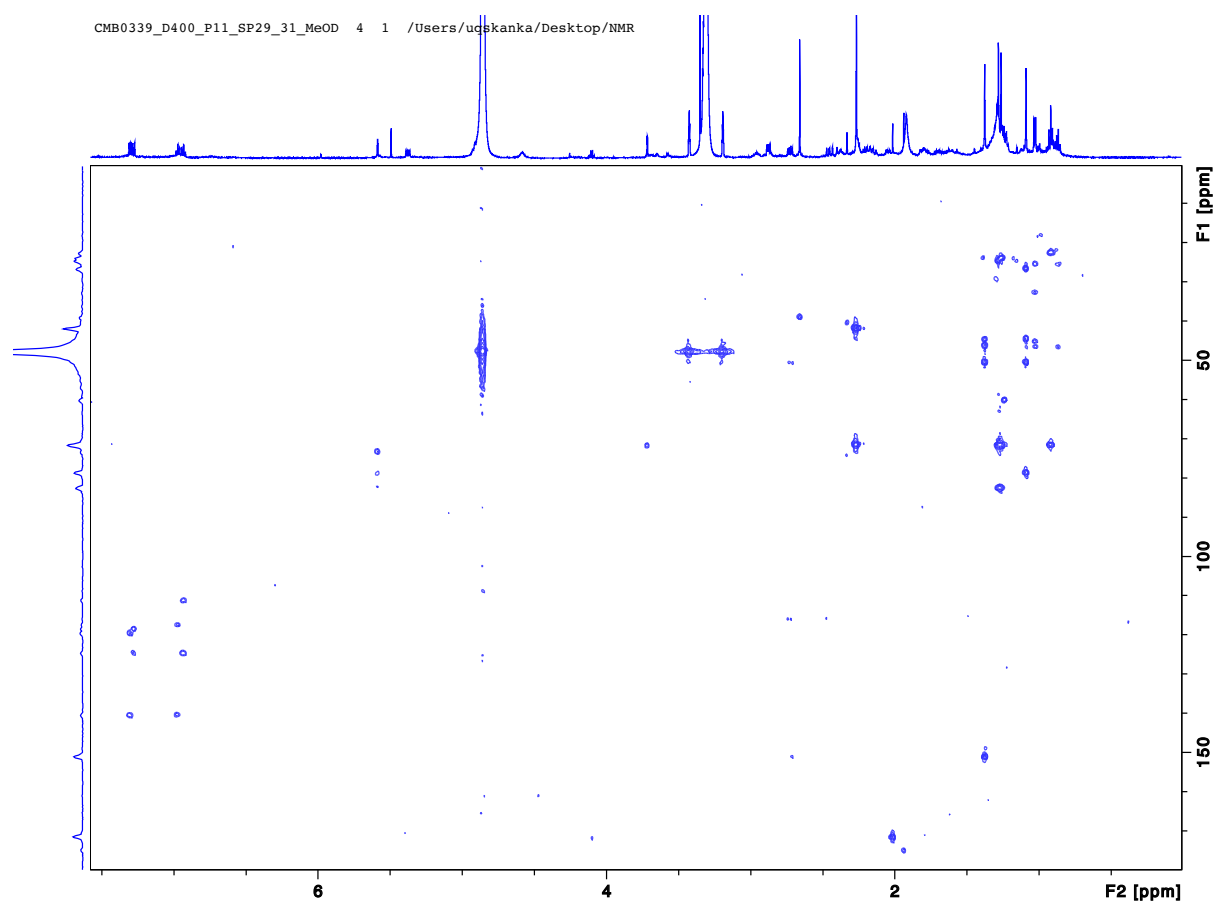

**Figure S34.** HMBC (methanol- $d_4$ ) spectrum of noonindole D (**8**)

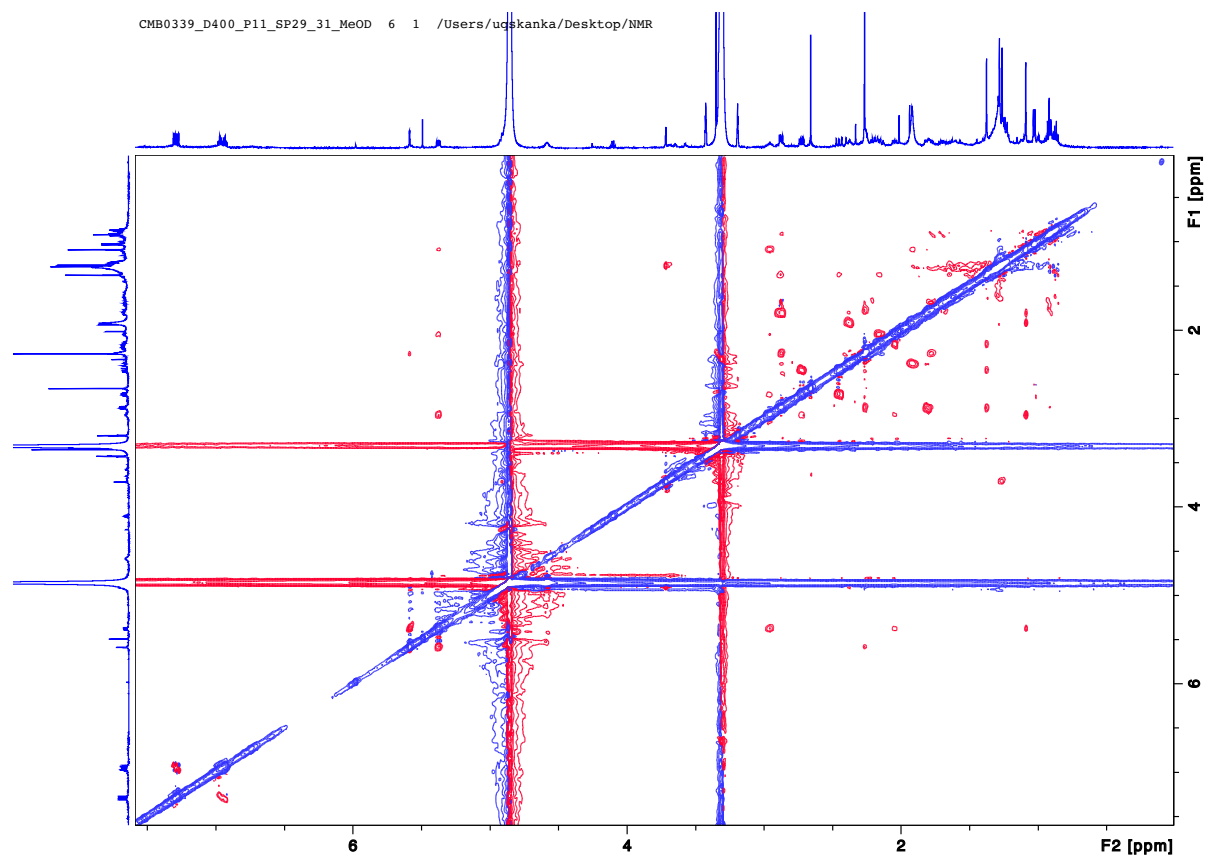

**Figure S35.** ROESY (methanol- $d_4$ ) spectrum of noonindole D (**8**)

## Mass Spectrum Molecular Formula Report

### Analysis Info

|               |                                                      |                   |                      |
|---------------|------------------------------------------------------|-------------------|----------------------|
| Analysis Name | D:\Data\k.kankaname\CMB0339_D400_P11_SP29_31_again.d | Acquisition Date  | 11/2/2021 1:56:53 PM |
| Method        | tune-med_AP.m                                        | Operator          | a.salim              |
| Sample Name   | CMB0339_D400_P11_SP29_31_again                       | Instrument / Ser# | micrOTOF 213750.00   |
| Comment       |                                                      |                   | 232                  |

### Acquisition Parameter

|             |            |                      |          |                  |           |
|-------------|------------|----------------------|----------|------------------|-----------|
| Source Type | ESI        | Ion Polarity         | Positive | Set Nebulizer    | 0.8 Bar   |
| Focus       | Not active |                      |          | Set Dry Heater   | 180 °C    |
| Scan Begin  | 100 m/z    | Set Capillary        | 4500 V   | Set Dry Gas      | 5.0 l/min |
| Scan End    | 1000 m/z   | Set End Plate Offset | -500 V   | Set Divert Valve | Source    |

### Generate Molecular Formula Parameter

|                  |  |                        |         |
|------------------|--|------------------------|---------|
| Formula, min.    |  | Tolerance              | Charge  |
| Formula, max.    |  | Minimum                | Maximum |
| Measured m/z     |  | Electron Configuration |         |
| Check Valence    |  | Minimum                | Maximum |
| Nitrogen Rule    |  |                        |         |
| Filter H/C Ratio |  |                        |         |
| Estimate Carbon  |  |                        |         |

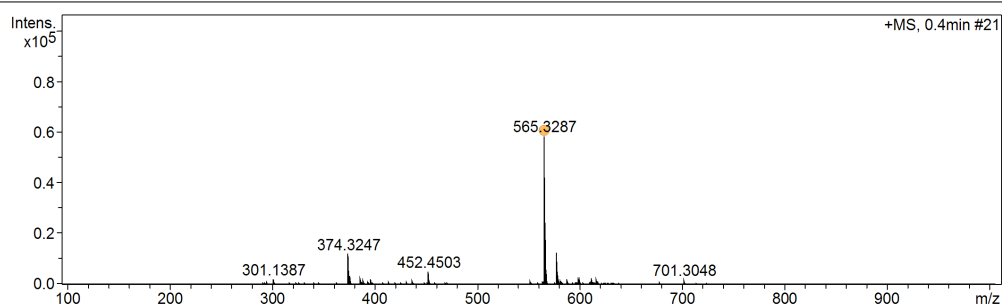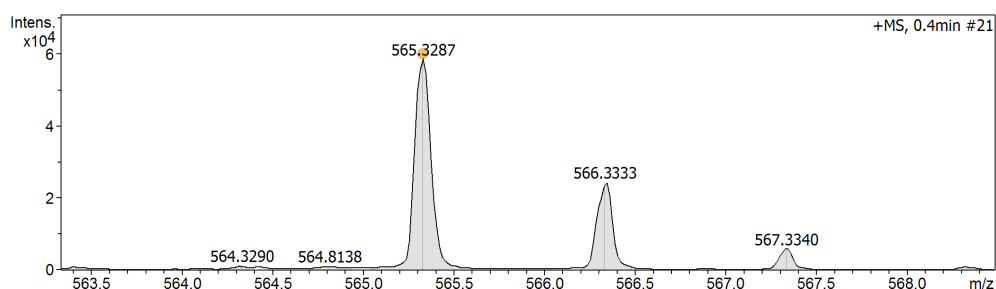

| Meas. m/z | # | Ion Formula | m/z      | err [ppm] | mSigma | # Sigma | Score  | rdb  | e <sup>-</sup> Conf | N-Rule |
|-----------|---|-------------|----------|-----------|--------|---------|--------|------|---------------------|--------|
| 565.3287  | 1 | C38H45O4    | 565.3312 | -4.5      | 3.7    | 1       | 25.45  | 16.5 | even                | ok     |
|           | 2 | C39H41N4    | 565.3326 | -6.9      | 13.5   | 2       | 5.45   | 21.5 | even                | ok     |
|           | 3 | C34H41N6O2  | 565.3286 | -0.2      | 13.9   | 3       | 100.00 | 17.5 | even                | ok     |
|           | 4 | C33H45N2O6  | 565.3272 | -2.6      | 23.7   | 4       | 39.72  | 12.5 | even                | ok     |
|           | 5 | C30H37N12   | 565.3259 | -5.0      | 26.6   | 5       | 12.80  | 18.5 | even                | ok     |

**Figure S36.** HRMS spectrum of noonindole D (**8**)

## 8 Noonindole E (9)

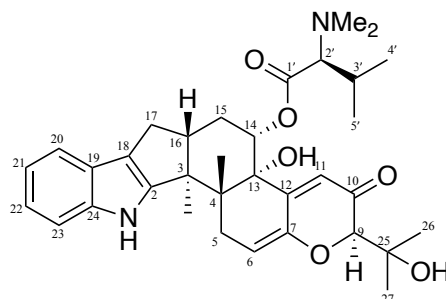

**Table S6.** 1D and 2D NMR (methanol-*d*<sub>4</sub>, 600 MHz) data for noonindole E (9)

| Pos.             | $\delta_{\text{H}}$ , mult. ( <i>J</i> in Hz)                                                       | $\delta_{\text{C}}$ | COSY                               | $^1\text{H}$ - $^{13}\text{C}$ HMBC       | ROESY        |
|------------------|-----------------------------------------------------------------------------------------------------|---------------------|------------------------------------|-------------------------------------------|--------------|
| 1-NH             | -                                                                                                   | -                   | -                                  | -                                         | -            |
| 2                | -                                                                                                   | 152.5               | -                                  | -                                         | -            |
| 3                | -                                                                                                   | 51.9                | -                                  | -                                         | -            |
| 4                | -                                                                                                   | 46.2                | -                                  | -                                         | -            |
| 5                | <i>a</i> 3.28*<br><i>b</i> 2.36 (d, 1H, <i>J</i> = 6.3 Hz)                                          | 33.0                | 5 <i>b</i> , 6<br>5 <i>a</i> , 6   | 6, 7, 4-Me<br>6, 7                        | -<br>-       |
| 6                | 5.74 (m, 1H)                                                                                        | 113.5               | 5 <i>a</i> , 5 <i>b</i>            | -                                         | -            |
| 7                | -                                                                                                   | 146.4               | -                                  | -                                         | -            |
| 9                | 4.09 (s, 1H)                                                                                        | 87.6                | -                                  | 7, 26 <sup>a</sup> , 27 <sup>a</sup> , 10 | 26, 27       |
| 10               | -                                                                                                   | 196.8               | -                                  | -                                         | -            |
| 11               | 5.71 (br s, 1H)                                                                                     | 119.5               | -                                  | 7, 9, 13                                  | 14           |
| 12               | -                                                                                                   | nd                  | -                                  | -                                         | -            |
| 13               | -                                                                                                   | 77.8                | -                                  | -                                         | -            |
| 14               | 5.41 (dd, 1H, <i>J</i> = 9.8, 5.8 Hz)                                                               | 75.5                | 15                                 | -                                         | 11, 16, 4-Me |
| 15               | 2.18 (m, 1H)                                                                                        | 30.0                | 14, 16                             | 3, 13, 16                                 | -            |
| 16               | 2.90 (m, 1H)                                                                                        | 47.5                | 15, 17 <i>a</i> , 17 <i>b</i>      | -                                         | 14, 4-Me     |
| 17               | <i>a</i> 2.72 (dd, 1H, <i>J</i> = 13.0, 6.5 Hz)<br><i>b</i> 2.44 (dd, 1H, <i>J</i> = 13.0, 10.8 Hz) | 28.0                | 16, 17 <i>b</i><br>16, 17 <i>a</i> | 2, 3, 18<br>18                            | -<br>-       |
| 18               | -                                                                                                   | 117.4               | -                                  | -                                         | -            |
| 19               | -                                                                                                   | 126.2               | -                                  | -                                         | -            |
| 20               | 7.30 (d, 1H, <i>J</i> = 7.2 Hz)                                                                     | 119.1               | 21                                 | 18, 22, 24                                | -            |
| 21               | 6.93 (m, 1H)                                                                                        | 120.0               | 20, 22                             | 19, 23                                    | -            |
| 22               | 6.97 (m, 1H)                                                                                        | 121.2               | 21, 23                             | 20, 24                                    | -            |
| 23               | 7.27 (d, 1H, <i>J</i> = 7.5 Hz)                                                                     | 112.8               | 22                                 | 19, 21                                    | -            |
| 24               | -                                                                                                   | 142.1               | -                                  | -                                         | -            |
| 25               | -                                                                                                   | 75.6                | -                                  | -                                         | -            |
| 26               | 1.33 (s, 3H)                                                                                        | 27.1 <sup>a</sup>   | -                                  | 9, 25, 27 <sup>a</sup>                    | 9            |
| 27               | 1.26 (s, 3H)                                                                                        | 27.1 <sup>a</sup>   | -                                  | 9, 25, 26 <sup>a</sup>                    | 9            |
| 1'               | -                                                                                                   | nd                  | -                                  | -                                         | -            |
| 2'               | 2.86 (d, 1H, <i>J</i> = 9.4 Hz)                                                                     | 76.0                | 3'                                 | NMe <sub>2</sub>                          | -            |
| 3'               | 2.11 (m, 1H)                                                                                        | 28.7                | 2', 4'/5'                          | -                                         | -            |
| 4'/5'            | 0.97 (t, 6H, <i>J</i> = 7.4 Hz)                                                                     | 19.9                | 3'                                 | 2', 3', 4'/5'                             | -            |
| 3-Me             | 1.40 (s, 3H)                                                                                        | 16.9                | -                                  | 2, 3, 4, 16                               | -            |
| 4-Me             | 1.14 (s, 3H)                                                                                        | 21.0                | -                                  | 3, 4, 5, 13                               | 14, 16       |
| NMe <sub>2</sub> | 2.34 (s, 6H)                                                                                        | 42.4                | -                                  | 2', NMe <sub>2</sub>                      | -            |

<sup>a</sup> Resonances with the same superscript within a column are overlapping and assignments may be interchanged

\*Obscured by residual MeOD signal

nd not detected

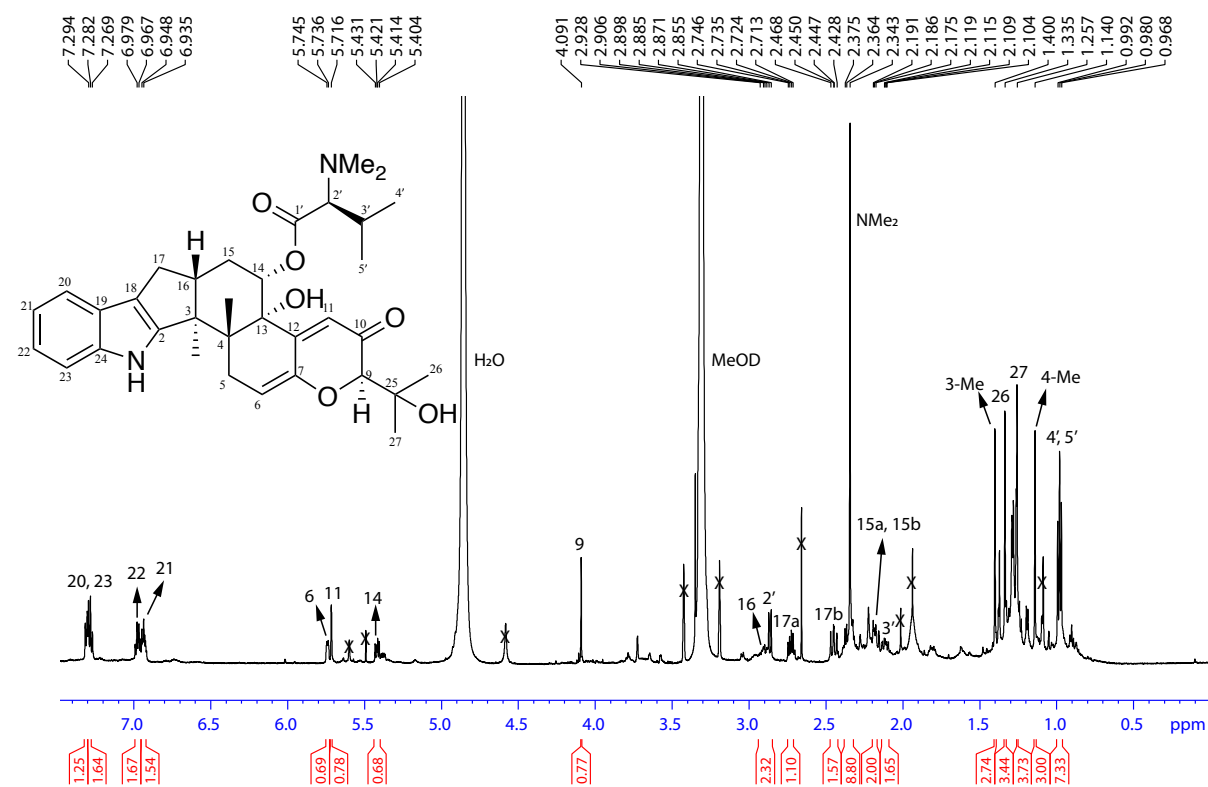

**Figure S37.** <sup>1</sup>H NMR (methanol-*d*<sub>4</sub>) spectrum of noonindole E (**9**)

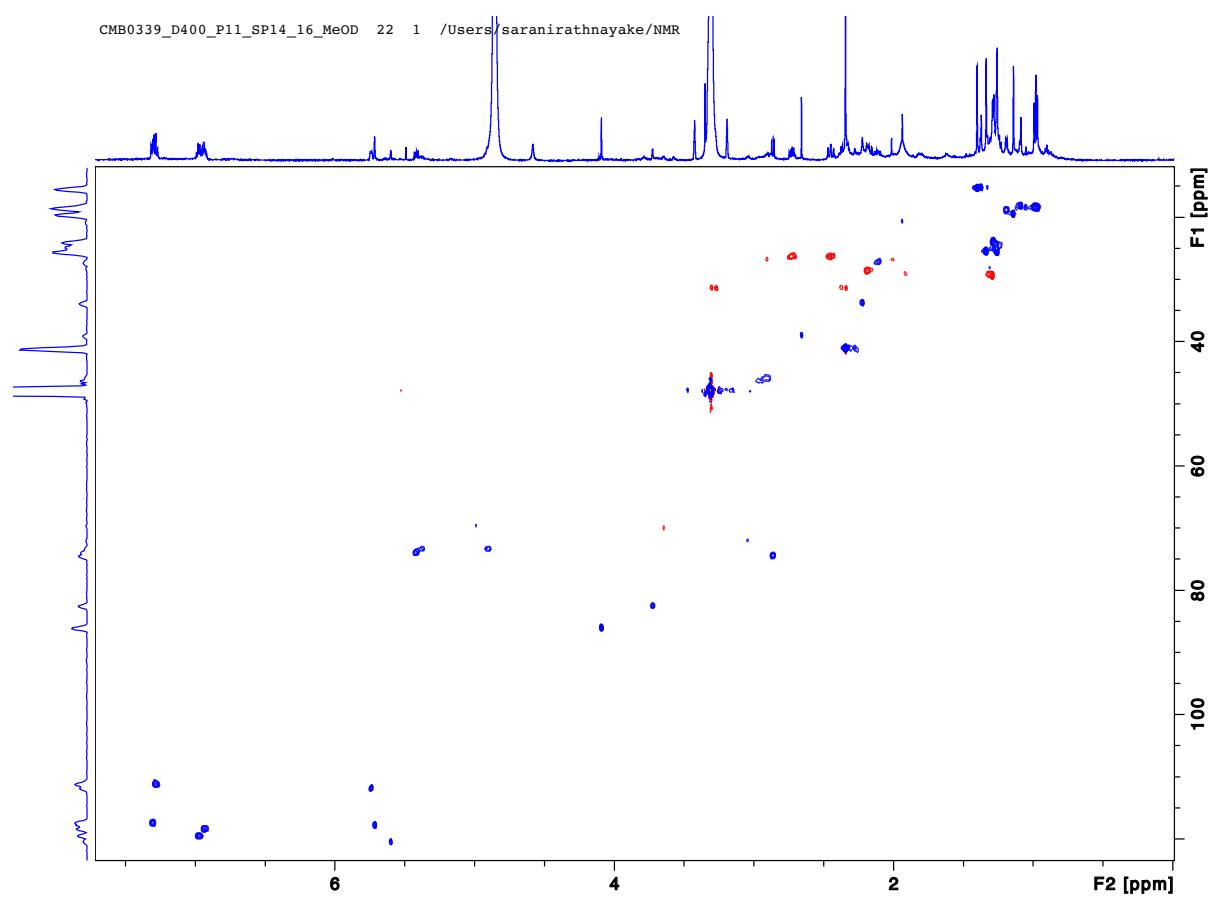

**Figure S38.** HSQC (methanol- $d_4$ ) spectrum of noonindole E (**9**)

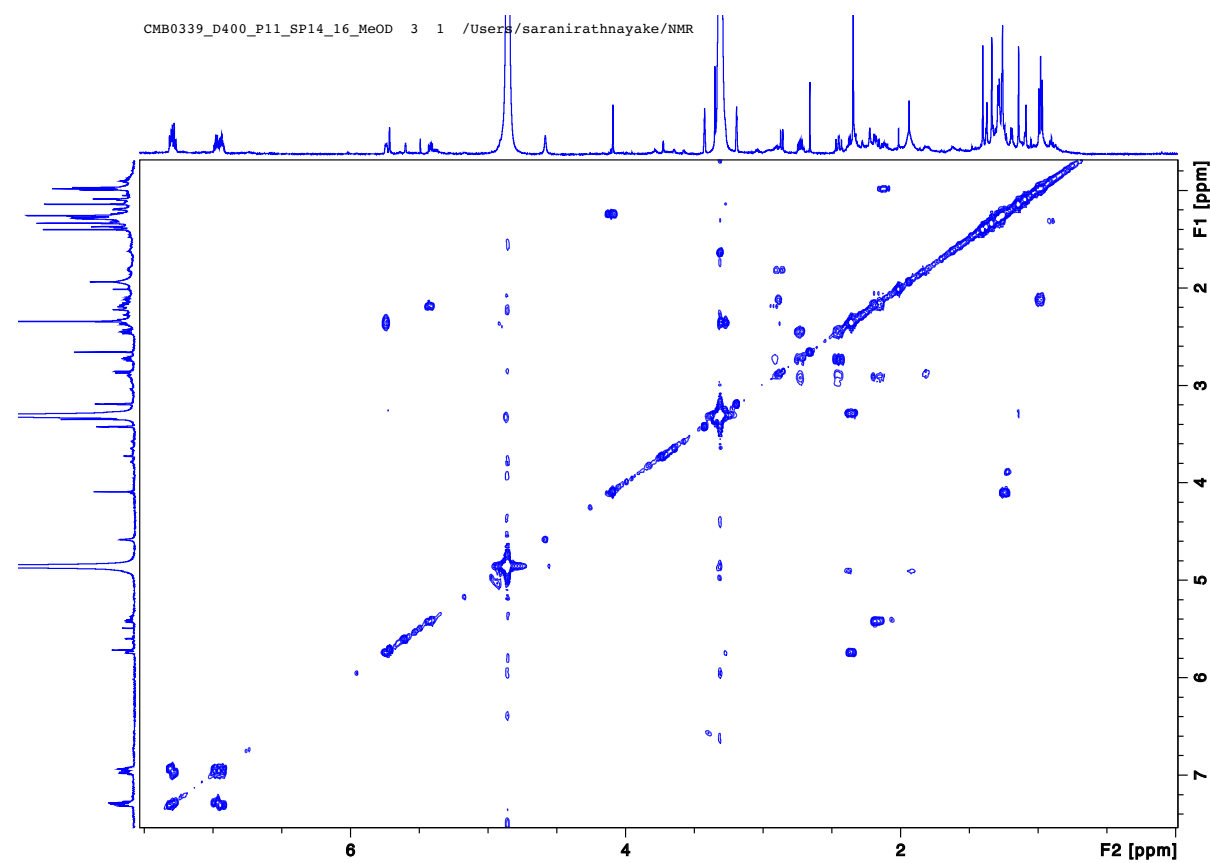

**Figure S39.** COSY (methanol- $d_4$ ) spectrum of noonindole E (**9**)

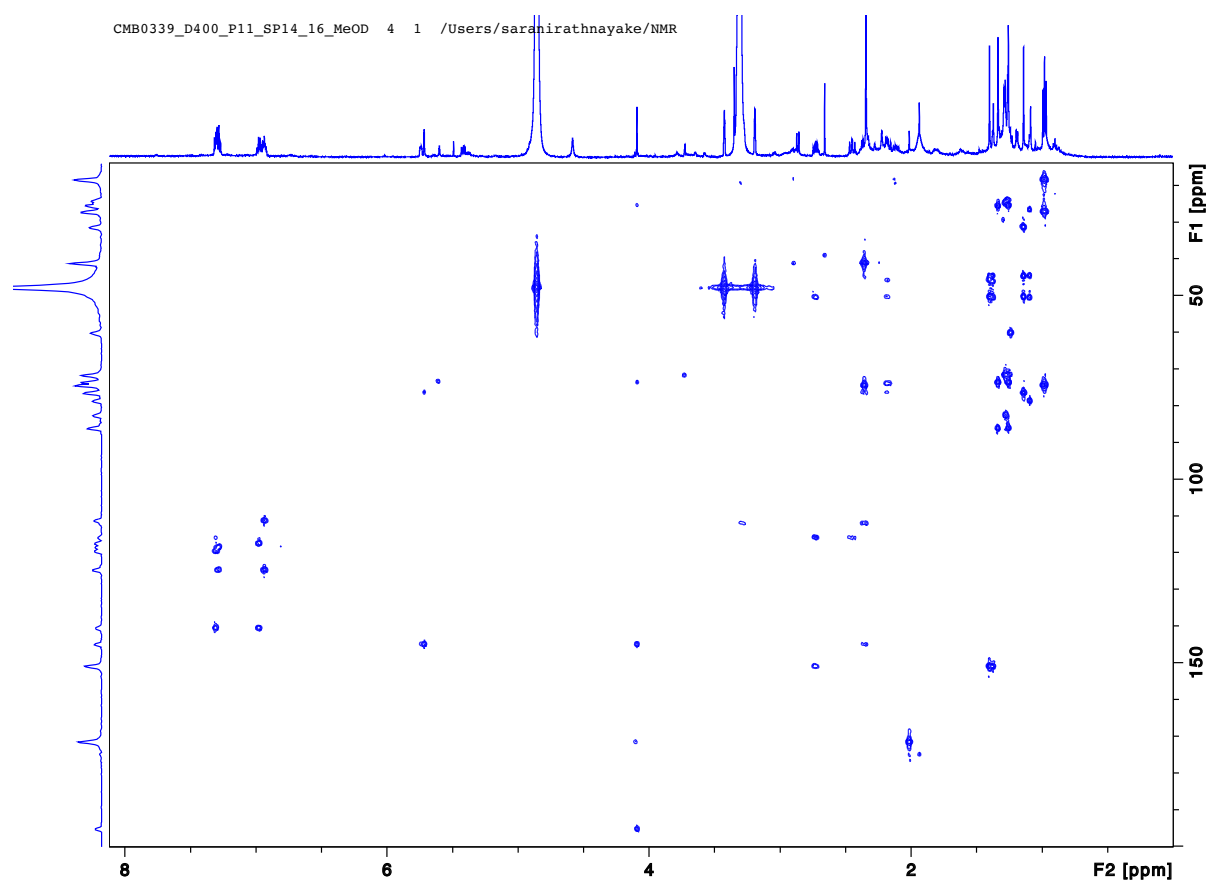

**Figure S40.** HMBC (methanol- $d_4$ ) spectrum of noonindole E (**9**)

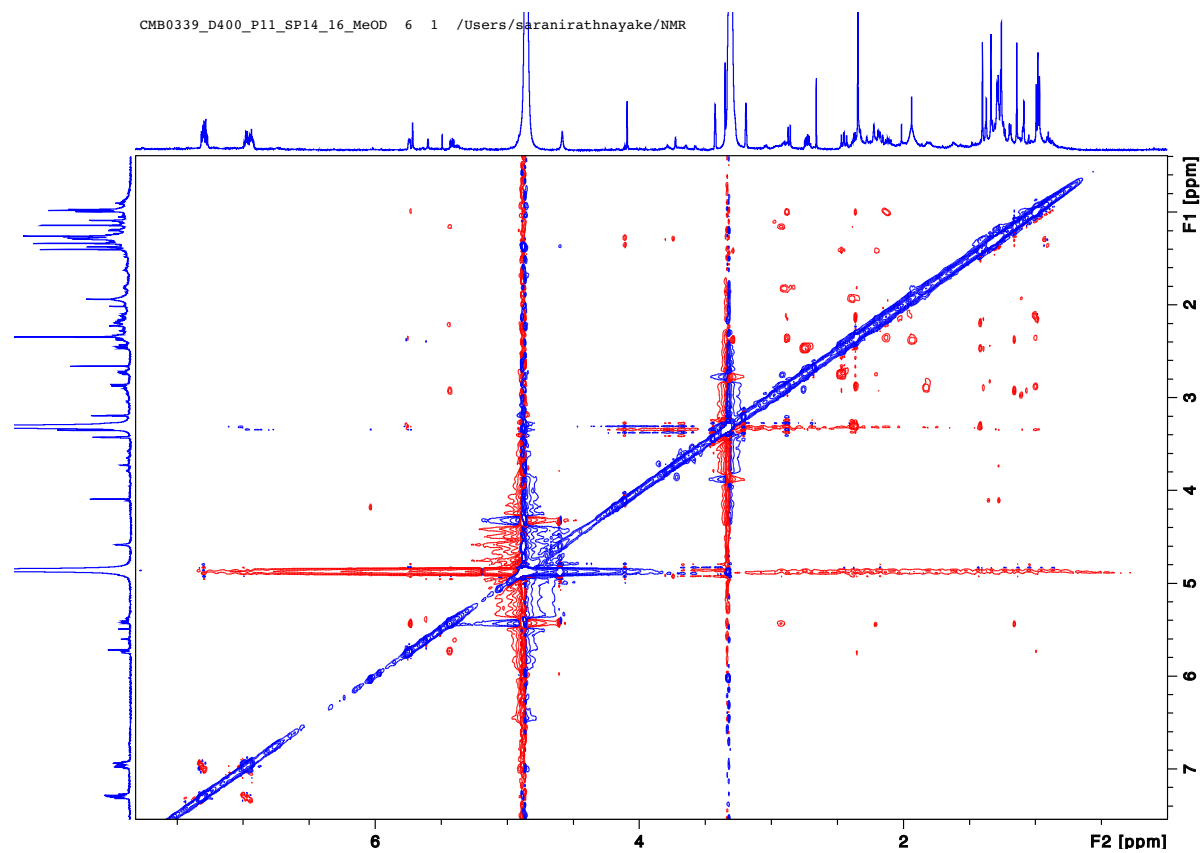

**Figure S41.** ROESY (methanol- $d_4$ ) spectrum of noonindole E (**9**)



## Mass Spectrum Molecular Formula Report

### Analysis Info

|               |                                                      |                   |                      |
|---------------|------------------------------------------------------|-------------------|----------------------|
| Analysis Name | D:\Data\s.kankaname\CMB0339_D400_P11_SP14_16_again.d | Acquisition Date  | 11/2/2021 2:06:04 PM |
| Method        | tune-med_AP.m                                        | Operator          | a.salim              |
| Sample Name   | CMB0339_D400_P11_SP14_16_again                       | Instrument / Ser# | micrOTOF 213750.00   |
| Comment       |                                                      |                   | 232                  |

### Acquisition Parameter

|             |            |                      |          |                  |           |
|-------------|------------|----------------------|----------|------------------|-----------|
| Source Type | ESI        | Ion Polarity         | Positive | Set Nebulizer    | 0.8 Bar   |
| Focus       | Not active |                      |          | Set Dry Heater   | 180 °C    |
| Scan Begin  | 100 m/z    | Set Capillary        | 4500 V   | Set Dry Gas      | 5.0 l/min |
| Scan End    | 1000 m/z   | Set End Plate Offset | -500 V   | Set Divert Valve | Source    |

### Generate Molecular Formula Parameter

|                  |                        |         |
|------------------|------------------------|---------|
| Formula, min.    | Tolerance              | Charge  |
| Formula, max.    | Minimum                | Maximum |
| Measured m/z     | Electron Configuration |         |
| Check Valence    | Minimum                | Maximum |
| Nitrogen Rule    |                        |         |
| Filter H/C Ratio |                        |         |
| Estimate Carbon  |                        |         |

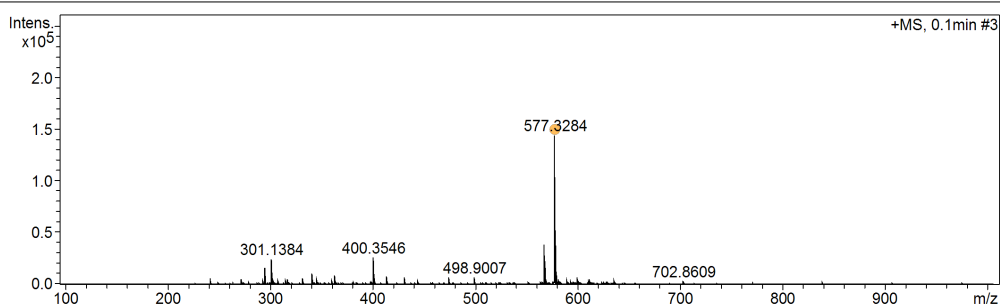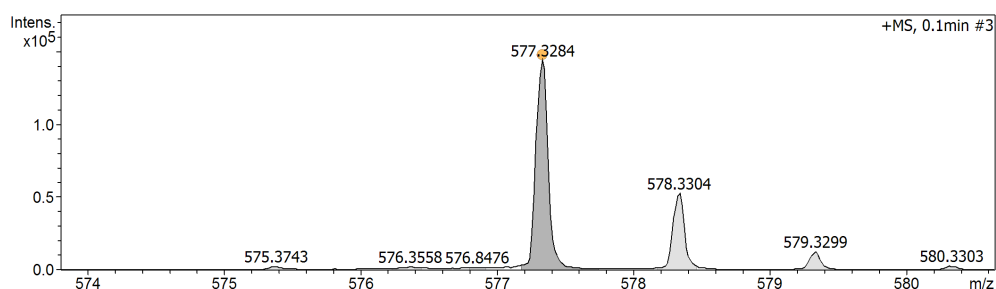

| Meas. m/z | # | Ion Formula | m/z      | err [ppm] | mSigma | # Sigma | Score  | rdb  | e <sup>-</sup> Conf | N-Rule |
|-----------|---|-------------|----------|-----------|--------|---------|--------|------|---------------------|--------|
| 577.3284  | 1 | C30H41N8O4  | 577.3245 | -6.7      | 8.0    | 1       | 7.33   | 14.5 | even                | ok     |
|           | 2 | C34H45N2O6  | 577.3272 | -2.0      | 9.0    | 2       | 74.87  | 13.5 | even                | ok     |
|           | 3 | C31H37N12   | 577.3259 | 4.4       | 12.1   | 3       | 26.28  | 19.5 | even                | ok     |
|           | 4 | C35H41N6O2  | 577.3286 | 0.3       | 20.7   | 4       | 100.00 | 18.5 | even                | ok     |
|           | 5 | C39H45O4    | 577.3312 | 4.9       | 32.5   | 5       | 12.57  | 17.5 | even                | ok     |

**Figure S42.** HRMS spectrum of noonindole E (**9**)

## 9 Noonindole F (10)

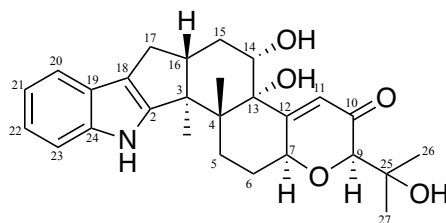

**Table S7.** 1D and 2D NMR (in methanol-*d*<sub>4</sub>, 600 MHz) data for noonindole F (**10**)

| Pos. | $\delta_{\text{H}}$ , mult. ( <i>J</i> in Hz)                                                             | $\delta_{\text{C}}$ | COSY                                                       | $^1\text{H}$ - $^{13}\text{C}$ HMBC | ROESY                   |
|------|-----------------------------------------------------------------------------------------------------------|---------------------|------------------------------------------------------------|-------------------------------------|-------------------------|
| 1-NH | -                                                                                                         | -                   | -                                                          | -                                   | -                       |
| 2    | -                                                                                                         | 152.9               | -                                                          | -                                   | -                       |
| 3    | -                                                                                                         | 51.8                | -                                                          | -                                   | -                       |
| 4    | -                                                                                                         | 44.7                | -                                                          | -                                   | -                       |
| 5    | <i>a</i> 2.80 (ddd, 1H, <i>J</i> = 13.5, 13.5, 5.1 Hz)<br><i>b</i> 1.79 (dd, 1H, <i>J</i> = 13.5, 5.1 Hz) | 28.1                | 5 <i>b</i> , 6 <i>a</i><br>5 <i>a</i> , 6 <i>b</i>         | 4, 6, 4-Me<br>6, 7, 13              | 3-Me<br>-               |
| 6    | <i>a</i> 2.33 (m, 1H)<br><i>b</i> 1.90 (m, 1H)                                                            | 30.2                | 5 <i>a</i> , 6 <i>b</i> , 7<br>6 <i>a</i> , 5 <i>b</i> , 7 | 7, 5, 4, 12<br>5, 7                 | 3-Me<br>-               |
| 7    | 4.88 (m, 1H)                                                                                              | 74.7                | 6 <i>a</i> , 6 <i>b</i> , 9, 11                            | 11, 12                              | 9                       |
| 9    | 3.78 (d, 1H, <i>J</i> = 1.5 Hz)                                                                           | 84.0                | 7                                                          | 7, 25, 26, 27                       | 7, 26, 27               |
| 10   | -                                                                                                         | 200.0               | -                                                          | -                                   | -                       |
| 11   | 6.01 (br s, 1H)                                                                                           | 122.9               | 7                                                          | 7, 9, 13                            | 14                      |
| 12   | -                                                                                                         | 167.5               | -                                                          | -                                   | -                       |
| 13   | -                                                                                                         | 80.8                | -                                                          | -                                   | -                       |
| 14   | 4.16 (dd, 1H, <i>J</i> = 10.5, 4.9 Hz)                                                                    | 70.3                | 15 <i>a</i> , 15 <i>b</i>                                  | -                                   | 4-Me, 16, 11            |
| 15   | <i>a</i> 2.08 (dd, 1H, <i>J</i> = 13.3, 10.5 Hz)<br><i>b</i> 1.93 (m, 1H)                                 | 31.7                | 14, 15 <i>b</i> , 16<br>15 <i>a</i> , 14                   | 14, 16<br>14, 16                    | -<br>4-Me               |
| 16   | 2.90 (m, 1H)                                                                                              | 48.0                | 15 <i>a</i> , 15 <i>b</i> , 17 <i>a</i> , 17 <i>b</i>      | 3-Me                                | 14, 4-Me                |
| 17   | <i>a</i> 2.68 (dd, 1H, <i>J</i> = 13.0, 6.1 Hz)<br><i>b</i> 2.42 (dd, 1H, <i>J</i> = 13.0, 10.0 Hz)       | 27.8                | 16, 17 <i>b</i><br>16, 17 <i>a</i>                         | 2, 3, 16, 18<br>16, 18              | -<br>-                  |
| 18   | -                                                                                                         | 117.4               | -                                                          | -                                   | -                       |
| 19   | -                                                                                                         | 126.2               | -                                                          | -                                   | -                       |
| 20   | 7.29 (d, 1H, <i>J</i> = 7.6 Hz)                                                                           | 118.8               | 21                                                         | 18, 22, 24                          | -                       |
| 21   | 6.92 (br dd, 1H, <i>J</i> = 7.6, 7.2 Hz)                                                                  | 119.8               | 20, 22                                                     | 19, 23                              | -                       |
| 22   | 6.95 (br dd, 1H, <i>J</i> = 7.4, 7.2 Hz)                                                                  | 120.9               | 21, 23                                                     | 20, 24                              | -                       |
| 23   | 7.26 (d, 1H, <i>J</i> = 7.4 Hz)                                                                           | 112.7               | 22                                                         | 19, 21                              | -                       |
| 24   | -                                                                                                         | 141.8               | -                                                          | -                                   | -                       |
| 25   | -                                                                                                         | 73.2                | -                                                          | -                                   | -                       |
| 26   | 1.29 (s, 3H)                                                                                              | 25.2                | -                                                          | 9, 25, 27                           | 9                       |
| 27   | 1.27 (s, 3H)                                                                                              | 26.2                | -                                                          | 9, 25, 26                           | 9                       |
| 3-Me | 1.32 (s, 3H)                                                                                              | 16.5                | -                                                          | 2, 3, 4, 16                         | 5 <i>a</i> , 6 <i>a</i> |
| 4-Me | 1.04 (s, 3H)                                                                                              | 19.6                | -                                                          | 3, 4, 5, 13                         | 14, 15 <i>b</i> , 16    |

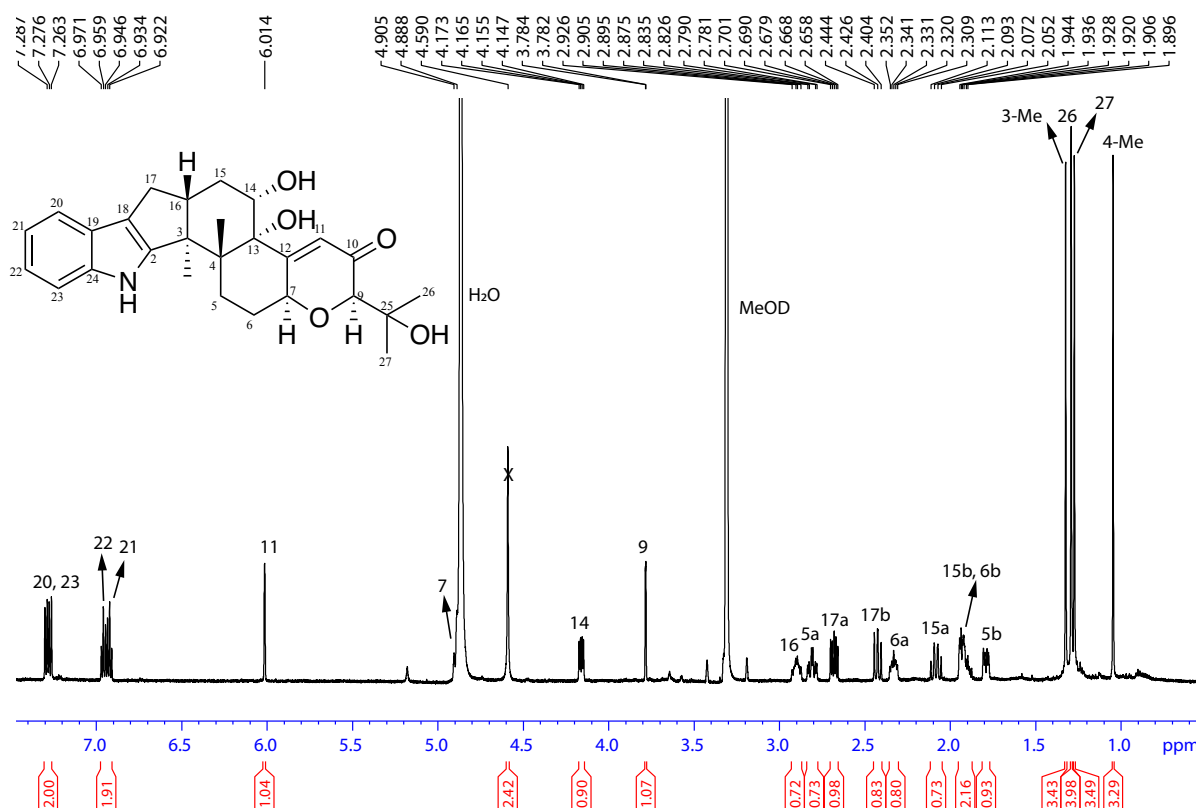

**Figure S43.** <sup>1</sup>H NMR (methanol-*d*<sub>4</sub>) spectrum of noonindole F (10)

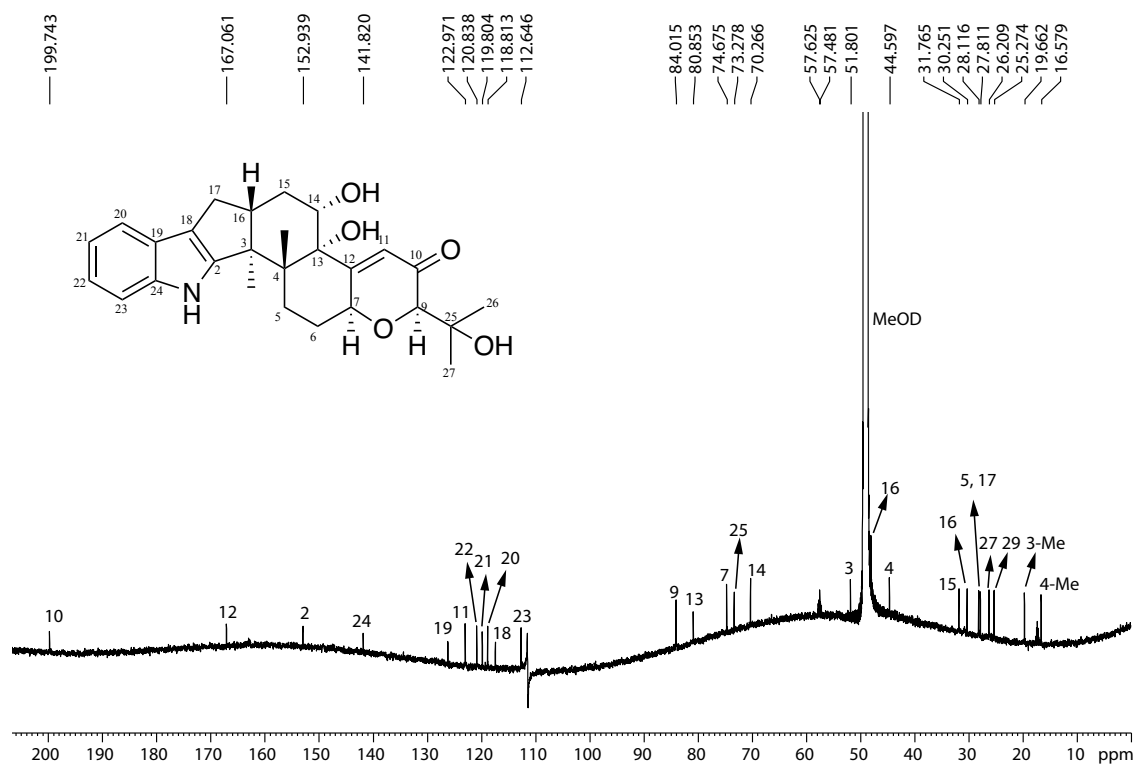

**Figure S44.** <sup>13</sup>C NMR (methanol-*d*<sub>4</sub>) spectrum of noonindole F (10)

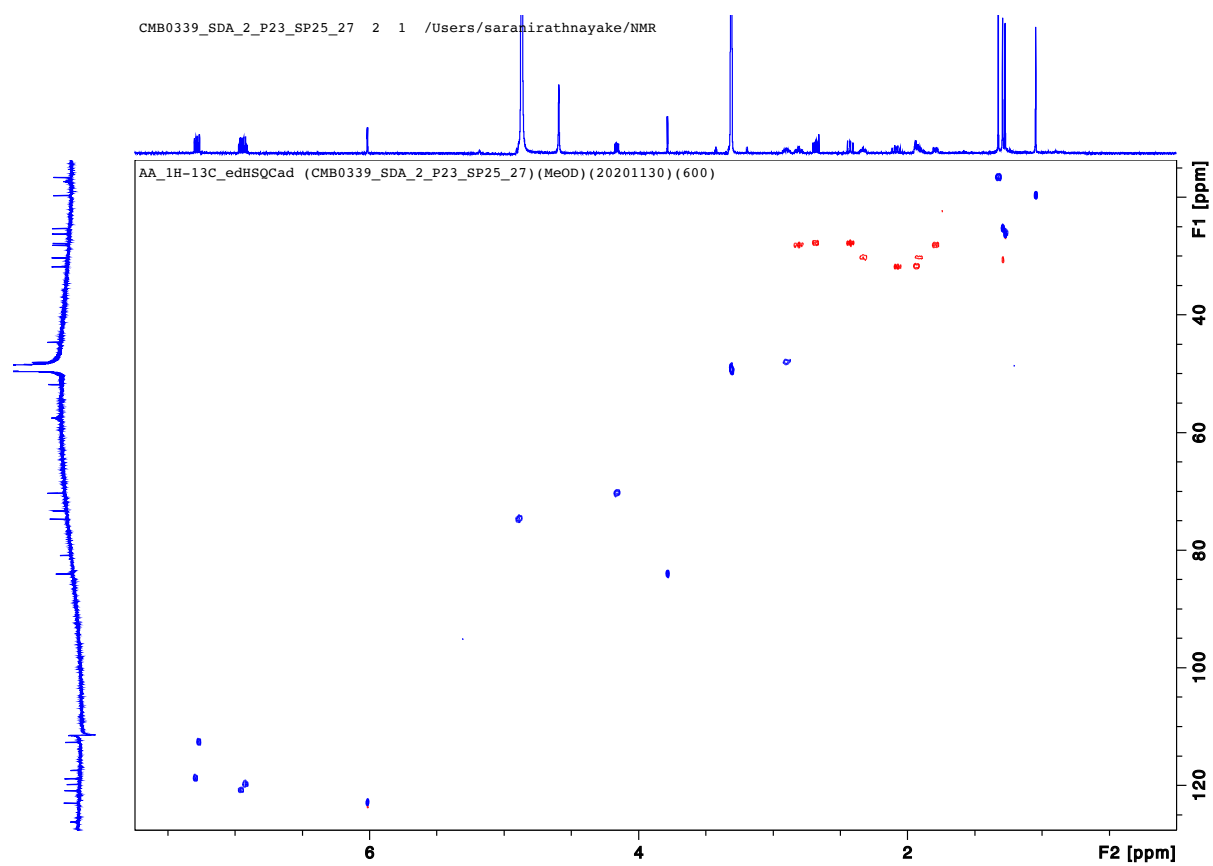

**Figure S45.** HSQC (methanol- $d_4$ ) spectrum of compound noonindole F (**10**)

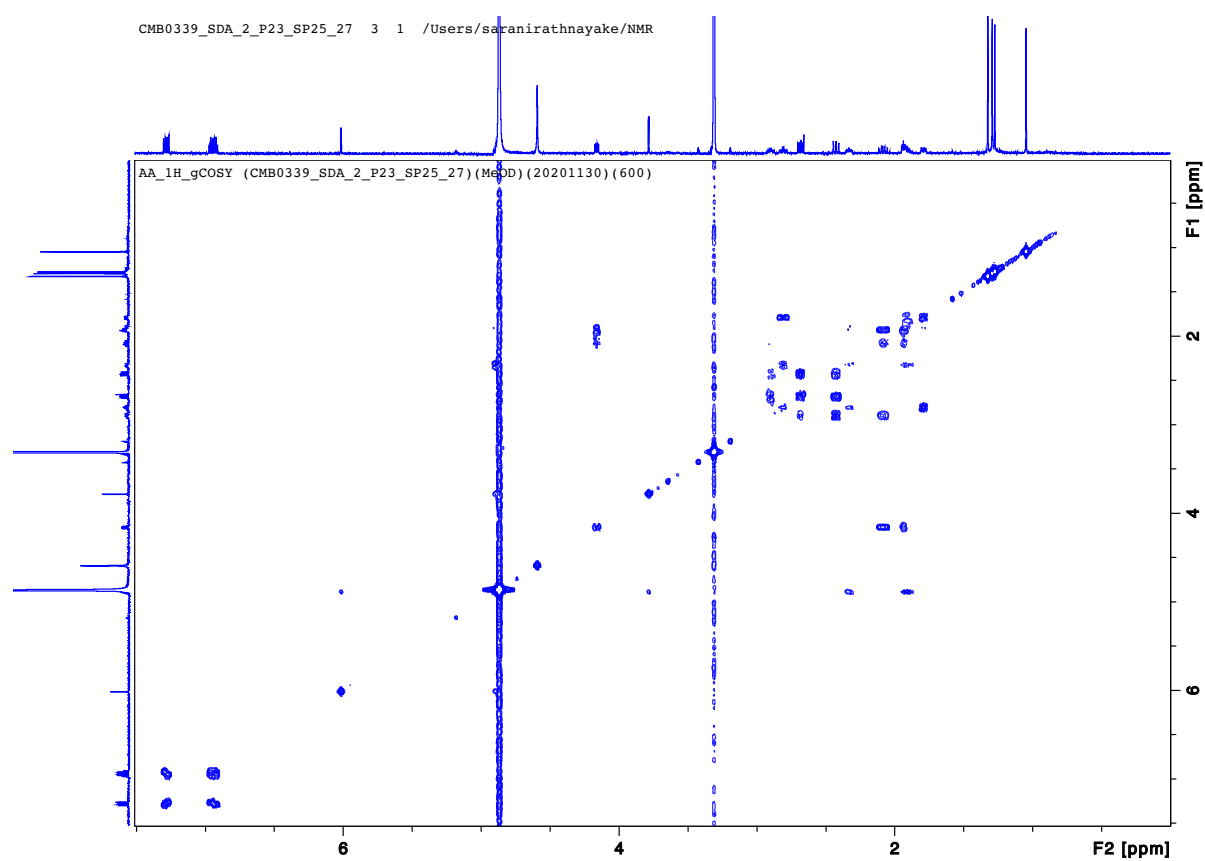

**Figure S46.** COSY (methanol- $d_4$ ) spectrum of compound noonindole F (**10**)

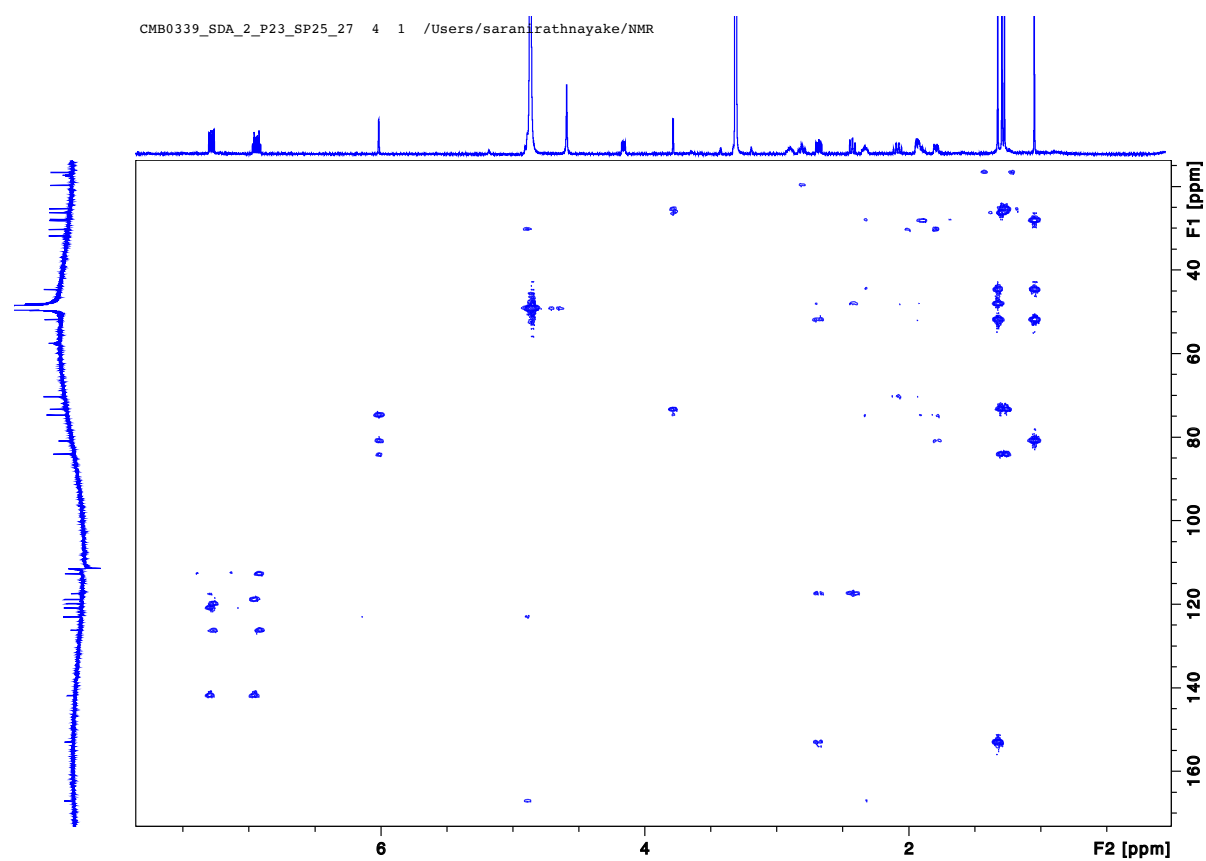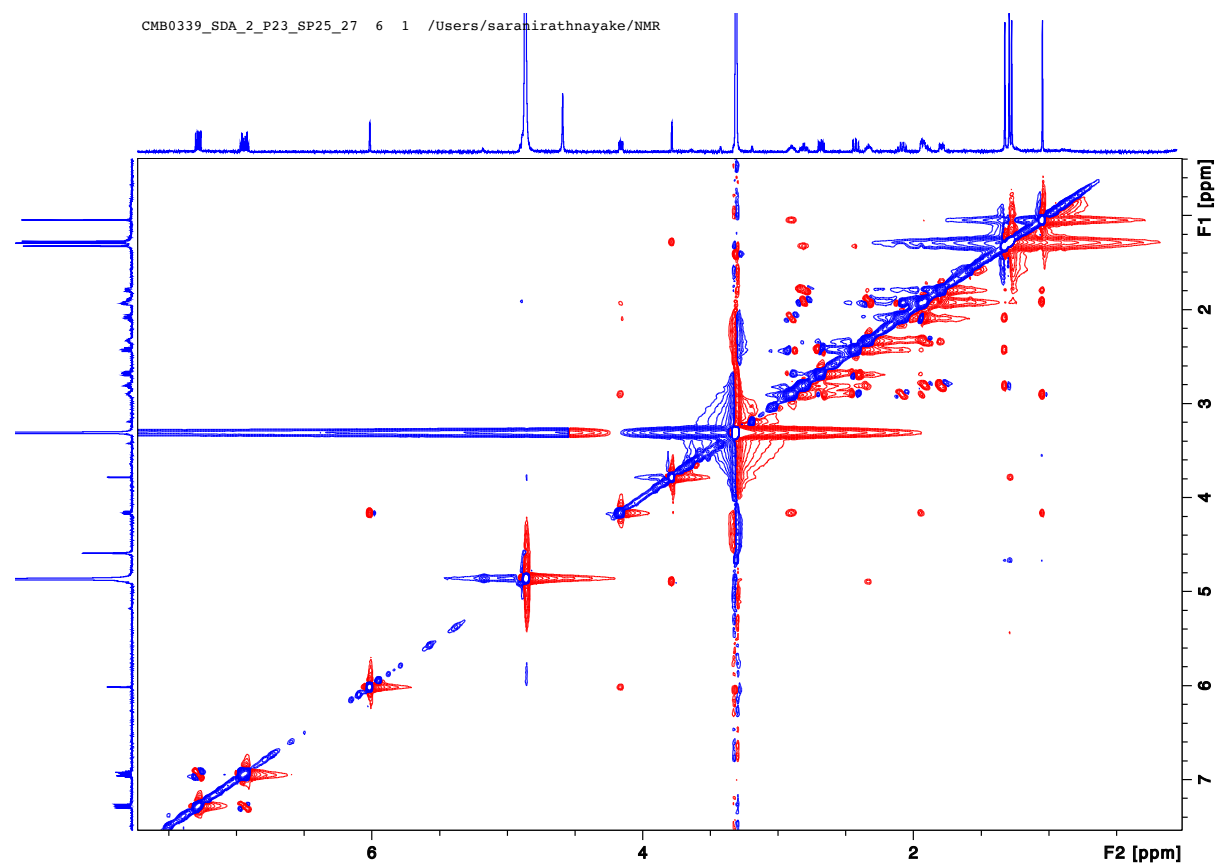

## Mass Spectrum Molecular Formula Report

### Analysis Info

Analysis Name D:\Data\s.kankaname\CMB0339\_SDA\_2\_P23\_SP25\_27.d  
 Method tune-medhigh\_AP.m  
 Sample Name CMB0339\_SDA\_2\_P23\_SP25\_27  
 Comment

Acquisition Date 11/30/2020 10:43:26 AM  
 Operator a.salim  
 Instrument / Ser# micrOTOF 213750.00  
 232

### Acquisition Parameter

|             |            |                      |          |                  |           |
|-------------|------------|----------------------|----------|------------------|-----------|
| Source Type | ESI        | Ion Polarity         | Positive | Set Nebulizer    | 0.5 Bar   |
| Focus       | Not active |                      |          | Set Dry Heater   | 180 °C    |
| Scan Begin  | 100 m/z    | Set Capillary        | 4500 V   | Set Dry Gas      | 5.0 l/min |
| Scan End    | 1500 m/z   | Set End Plate Offset | -500 V   | Set Divert Valve | Source    |

### Generate Molecular Formula Parameter

|                  |  |                        |
|------------------|--|------------------------|
| Formula, min.    |  |                        |
| Formula, max.    |  |                        |
| Measured m/z     |  | Tolerance              |
| Check Valence    |  | Minimum                |
| Nitrogen Rule    |  | Electron Configuration |
| Filter H/C Ratio |  | Minimum                |
| Estimate Carbon  |  | Maximum                |

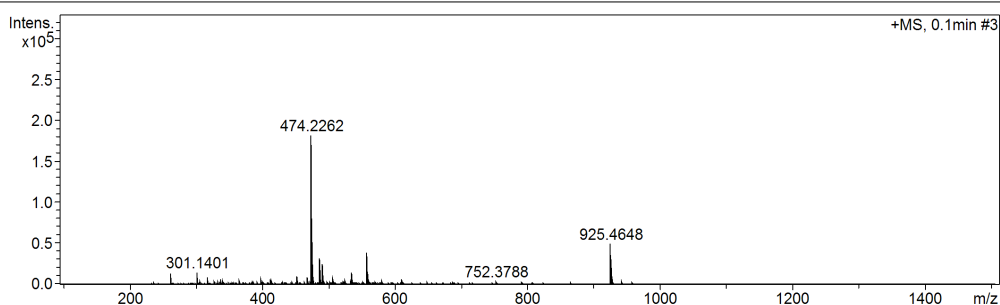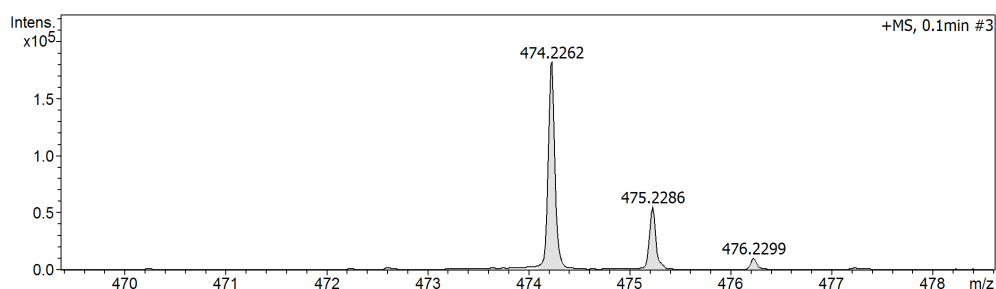

| Meas. m/z | # | Ion Formula   | m/z      | err [ppm] | mSigma | # Sigma | Score  | rdb  | e <sup>-</sup> Conf | N-Rule |
|-----------|---|---------------|----------|-----------|--------|---------|--------|------|---------------------|--------|
| 474.2262  | 1 | C27H33NNaO5   | 474.2251 | -2.4      | 1.3    | 1       | 74.93  | 11.5 | even                | ok     |
|           | 2 | C28H29N5NaO   | 474.2264 | 0.4       | 12.0   | 2       | 100.00 | 16.5 | even                | ok     |
|           | 3 | C23H29N7NaO3  | 474.2224 | -8.1      | 12.7   | 3       | 6.01   | 12.5 | even                | ok     |
|           | 4 | C17H29N11NaO4 | 474.2296 | 7.1       | 37.8   | 4       | 5.43   | 8.5  | even                | ok     |
|           | 5 | C16H33N7NaO8  | 474.2283 | 4.3       | 48.8   | 5       | 13.44  | 3.5  | even                | ok     |
|           | 6 | C13H25N17NaO2 | 474.2269 | -1.5      | 57.5   | 6       | 18.24  | 9.5  | even                | ok     |
|           | 7 | C12H29N13NaO6 | 474.2256 | -1.3      | 70.0   | 7       | 12.21  | 4.5  | even                | ok     |
|           | 8 | C9H21N23Na    | 474.2242 | 4.2       | 71.4   | 8       | 4.97   | 10.5 | even                | ok     |

**Figure S49.** HRMS spectrum of noonindole F (**10**)

## 10 Paspaline (11)

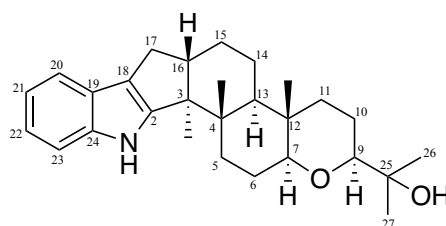

**Table S8.1D** and 2D NMR (DMSO-*d*<sub>6</sub>, 600 MHz) data of paspaline (**11**)  
(Reported data are shaded in grey)

| Pos.  | $\delta_{\text{H}}$ , mult. ( <i>J</i> in Hz)                                                          | $\delta_{\text{C}}$ | COSY                         | $^1\text{H}$ - $^{13}\text{C}$ HMBC | $\delta_{\text{H}}$ , mult. ( <i>J</i> in Hz) [1] | $\delta_{\text{C}}$ [1] |
|-------|--------------------------------------------------------------------------------------------------------|---------------------|------------------------------|-------------------------------------|---------------------------------------------------|-------------------------|
| 1-NH  | 10.56, s                                                                                               | -                   | -                            | 2, 18, 19, 24                       | -                                                 | -                       |
| 2     | -                                                                                                      | 151.6               | -                            | -                                   | -                                                 | 151.2                   |
| 3     | -                                                                                                      | 52.9                | -                            | -                                   | -                                                 | 52.6                    |
| 4     | -                                                                                                      | 39.9                | -                            | -                                   | -                                                 | 39.2                    |
| 5     | <i>a</i> 1.92 (m, 1H)<br><i>b</i> 1.78 (m, 1H)                                                         | 32.1                | <i>5b</i><br><i>5a</i>       | 4, 7, 13, 4-Me<br>4, 7, 4-Me        | 1.91 (m, 1H)<br>1.60 (m, 1H)                      | 31.1<br>31.1            |
| 6     | <i>a</i> 1.69 <sup>a</sup> (m, 1H)<br><i>b</i> 1.55 <sup>b</sup> (m, 1H)                               | 24.3                | -                            | -                                   | 1.78 (m, 1H)<br>1.72 (m, 1H)                      | 24.7<br>24.7            |
| 7     | 2.97 (dd, 1H, <i>J</i> = 11.6, 3.4 Hz)                                                                 | 84.9                | -                            | 5, 9, 11, 12-Me                     | 2.94 (dd, 1H, <i>J</i> = 11.5, 2.4 Hz)            | 85.4                    |
| 9     | 3.08 (dd, 1H, <i>J</i> = 11.5, 1.8 Hz)                                                                 | 84.2                | -                            | 7, 25, 26, 27                       | 3.09 (dd, 1H, <i>J</i> = 11.7, 2.2 Hz)            | 84.7                    |
| 10    | <i>a</i> 1.54 <sup>b</sup> (m, 1H)<br><i>b</i> 1.47 <sup>c</sup> (m, 1H)                               | 20.9                | -                            | -                                   | 1.68 (m, 1H)<br>1.44 (m, 1H)                      | 21.2<br>21.2            |
| 11    | <i>a</i> 1.75 (m, 1H)<br><i>b</i> 1.10 (m, 1H)                                                         | 37.0                | 11b<br>11a, 10b <sup>c</sup> | 10, 12<br>-                         | 1.30 (m, 1H)<br>1.27 (m, 1H)                      | 37.4<br>37.4            |
| 12    | -                                                                                                      | 36.6                | -                            | -                                   | -                                                 | 36.2                    |
| 13    | 1.46 <sup>c</sup> (m, 1H)                                                                              | 45.6                | -                            | -                                   | 1.42 (m, 1H)                                      | 46.1                    |
| 14    | <i>a</i> 1.63 (br d, 1H, <i>J</i> = 12.6 Hz)<br><i>b</i> 1.33 (ddd, 1H, <i>J</i> = 16.5, 12.6, 4.1 Hz) | 21.2                | 14b<br>14a                   | 4, 13, 15, 16<br>4, 13, 15          | 1.55 (m, 1H)<br>1.28 (m, 1H)                      | 21.6<br>21.6            |
| 15    | <i>a</i> 1.70 <sup>a</sup> (m, 1H)<br><i>b</i> 1.54 <sup>b</sup> (m, 1H)                               | 24.8                | -                            | -                                   | 1.77 (m, 1H)<br>1.53 (m, 1H)                      | 25.3<br>25.3            |
| 16    | 2.64 (m, 1H)                                                                                           | 48.3                | 17a, 17b                     | 3, 17, 3-Me                         | 2.72 (t, 1H, <i>J</i> = 6.4 Hz)                   | 48.7                    |
| 17    | <i>a</i> 2.55 (dd, 1H, <i>J</i> = 13.2, 6.3 Hz)<br><i>b</i> 2.23 (dd, 1H, <i>J</i> = 13.2, 11.3 Hz)    | 26.8                | 17b, 16<br>17a, 16           | 2, 3, 16, 18<br>2, 15, 16, 18       | 2.60 (m, 1H)<br>2.53 (m, 1H)                      | 28.7<br>28.7            |
| 18    | -                                                                                                      | 116.2               | -                            | -                                   | -                                                 | 115.9                   |
| 19    | -                                                                                                      | 124.9               | -                            | -                                   | -                                                 | 124.5                   |
| 20    | 7.25 <sup>d</sup> (dd, 1H, <i>J</i> = 7.4, 2.5 Hz)                                                     | 117.2               | -                            | -                                   | 7.25 (d, 1H, <i>J</i> = 7.9 Hz)                   | 117.7                   |
| 21    | 6.88 (dd, 1H, <i>J</i> = 7.9, 7.4 Hz)                                                                  | 118.0               | 20 <sup>d</sup> , 22         | 19, 23                              | 6.92 (t, 1H, <i>J</i> = 6.7 Hz)                   | 118.5                   |
| 22    | 6.92 (dd, 1H, <i>J</i> = 7.9, 7.4 Hz)                                                                  | 118.9               | 21, 23 <sup>d</sup>          | 20, 24                              | 6.90 (t, 1H, <i>J</i> = 6.7 Hz)                   | 119.4                   |
| 23    | 7.25 <sup>d</sup> (dd, 1H, <i>J</i> = 7.4, 2.5 Hz)                                                     | 111.5               | -                            | -                                   | 7.26 (d, 1H, <i>J</i> = 7.9 HZ)                   | 112.0                   |
| 24    | -                                                                                                      | 140.8               | -                            | -                                   | -                                                 | 140.4                   |
| 25    | -                                                                                                      | 70.9                | -                            | -                                   | -                                                 | 70.5                    |
| 26    | 1.04 <sup>e</sup> (s, 3H)                                                                              | 24.4                | -                            | -                                   | 1.03 (s, 3H)                                      | 26.8                    |
| 27    | 1.09 (s, 3H)                                                                                           | 26.7                | -                            | 9, 25, 29                           | 1.05 (s, 3H)                                      | 28.9                    |
| 12-Me | 0.82 (s, 3H)                                                                                           | 12.4                | -                            | 7, 11, 12, 13                       | 0.81 (s, 3H)                                      | 14.0                    |
| 3-Me  | 0.95 (s, 3H)                                                                                           | 14.3                | -                            | 2, 3, 4, 16                         | 1.10 (s, 3H)                                      | 14.6                    |
| 4-Me  | 1.04 <sup>e</sup> (s, 3H)                                                                              | 19.2                | -                            | -                                   | 0.81 (s, 3H)                                      | 22.2                    |
| 25-OH | 4.07 (s, 1H)                                                                                           | -                   | -                            | 9, 25, 26, 27                       | -                                                 | -                       |

<sup>a-c</sup> Resonances with the same superscript within a column are overlapping and assignments may be interchanged

\*Literature data were recorded ( $^1\text{H}$  NMR in 600 MHz and  $^{13}\text{C}$  NMR in 150 MHz) in DMSO-*d*<sub>6</sub>

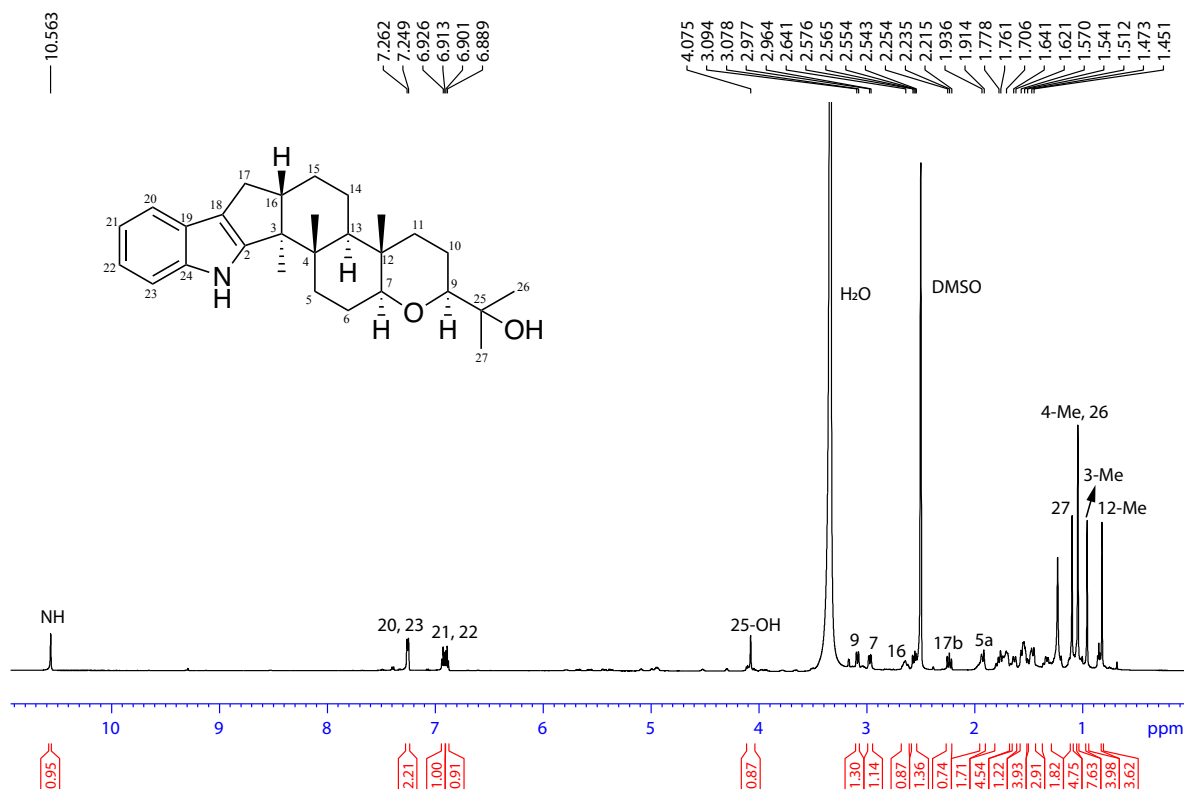

**Figure S50.** <sup>1</sup>H NMR (DMSO-*d*<sub>6</sub>) spectrum of paspaline (11)

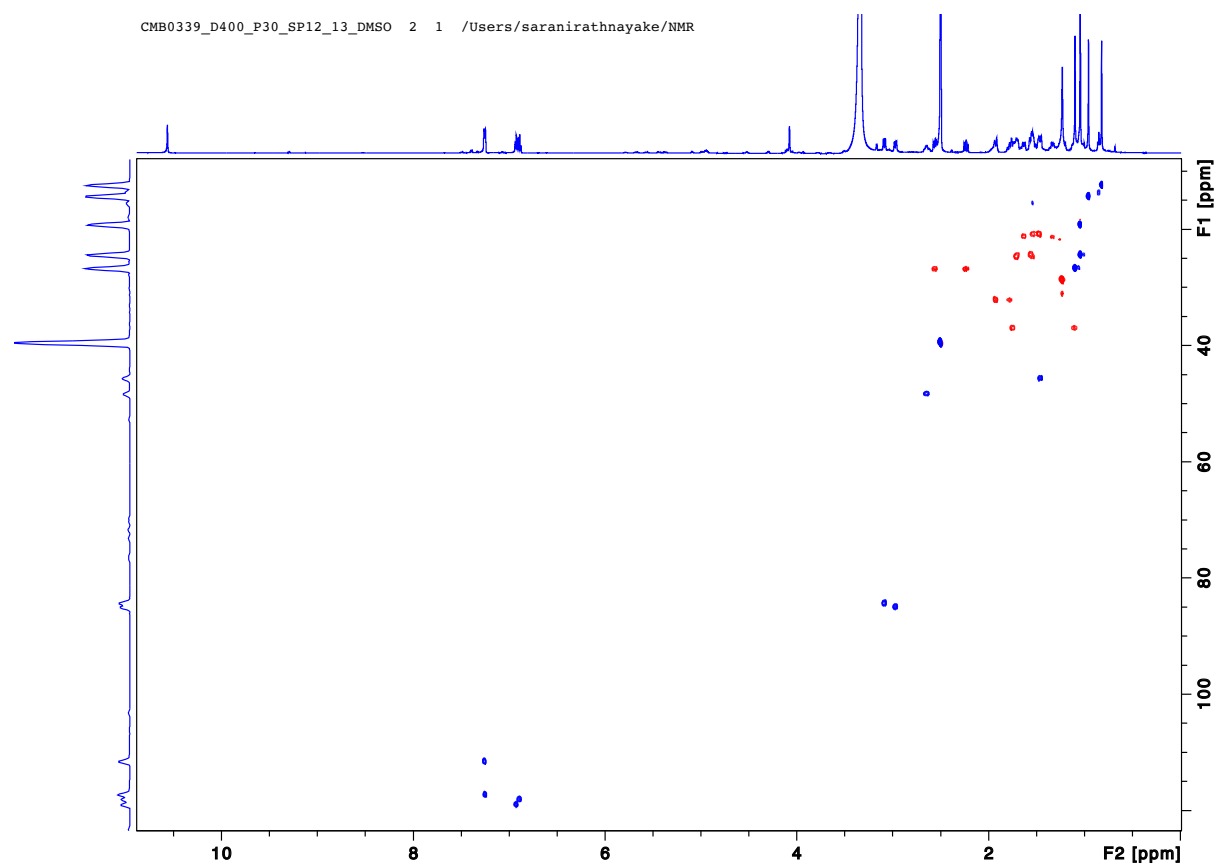

**Figure S51.** HSQC (DMSO-*d*<sub>6</sub>) spectrum of paspaline (11)



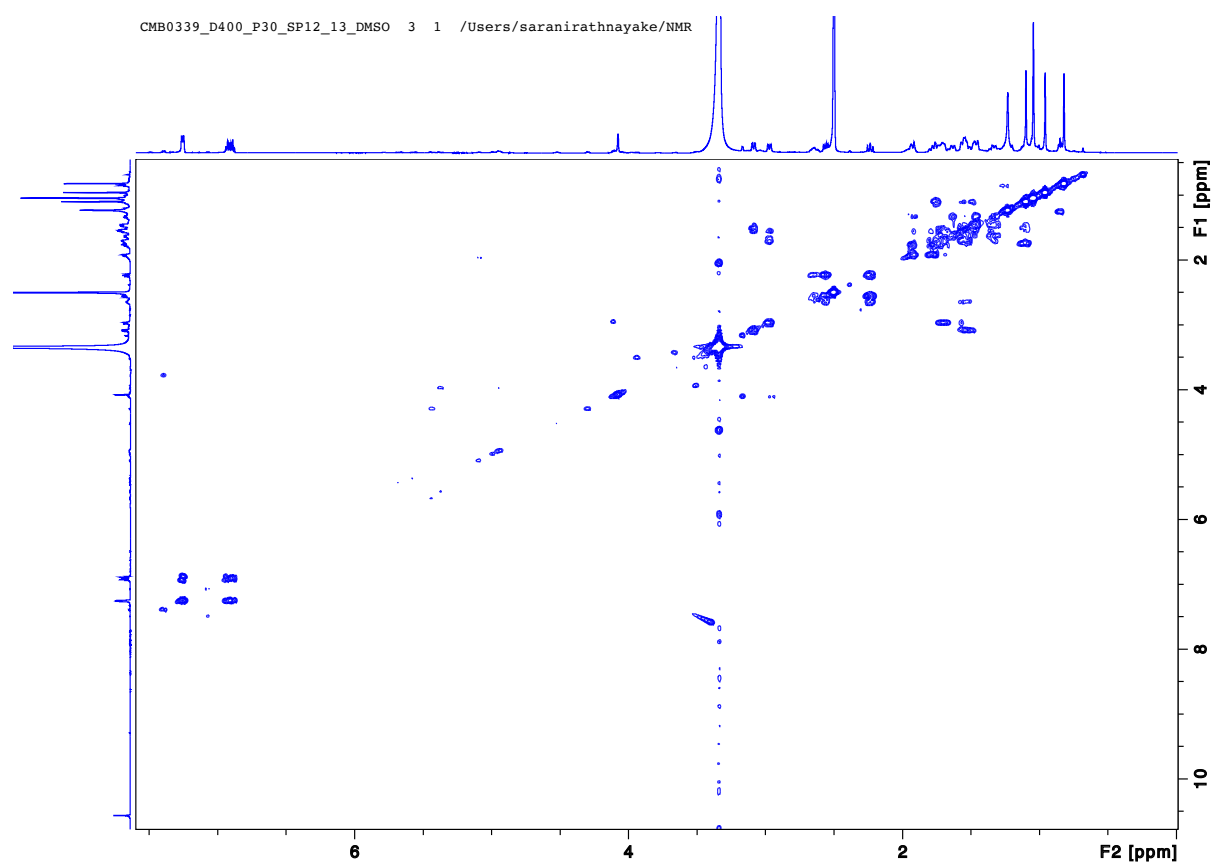

**Figure S52.** COSY (DMSO- $d_6$ ) spectrum of paspaline (11)

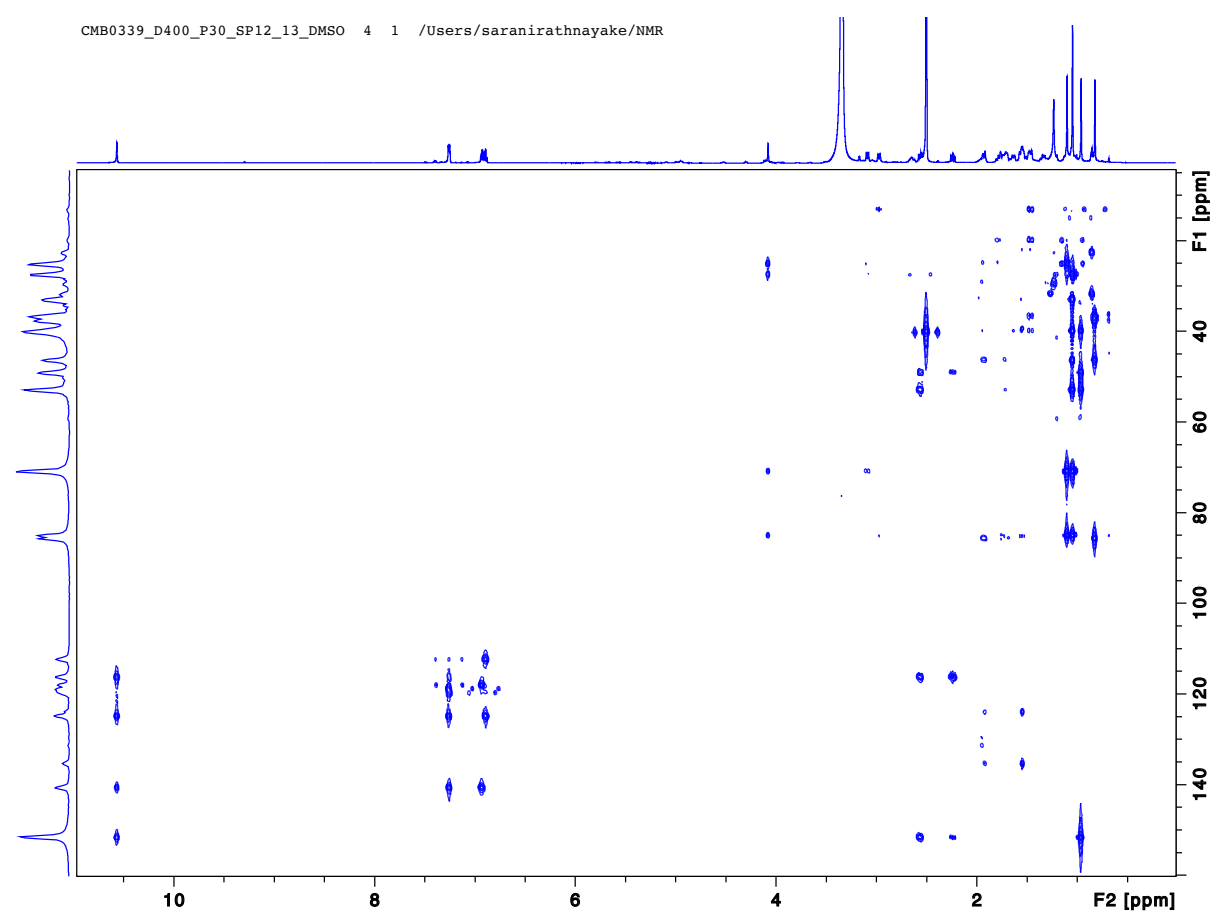

**Figure S53.** HMBC (DMSO- $d_6$ ) spectrum of paspaline (11)

## Mass Spectrum Molecular Formula Report

### Analysis Info

Analysis Name D:\Data\s.kankaname\CMB0339\_D400\_P30\_SP12\_13.d  
 Method tune-medhigh\_AP.m  
 Sample Name CMB0339\_D400\_P30\_SP12\_13  
 Comment

Acquisition Date 9/8/2021 4:50:26 PM  
 Operator a.salim  
 Instrument / Ser# micrOTOF 213750.00  
 232

### Acquisition Parameter

|             |            |                      |          |                  |           |
|-------------|------------|----------------------|----------|------------------|-----------|
| Source Type | ESI        | Ion Polarity         | Positive | Set Nebulizer    | 0.5 Bar   |
| Focus       | Not active |                      |          | Set Dry Heater   | 180 °C    |
| Scan Begin  | 100 m/z    | Set Capillary        | 4500 V   | Set Dry Gas      | 5.0 l/min |
| Scan End    | 1500 m/z   | Set End Plate Offset | -500 V   | Set Divert Valve | Source    |

### Generate Molecular Formula Parameter

|                  |                        |         |
|------------------|------------------------|---------|
| Formula, min.    |                        |         |
| Formula, max.    |                        |         |
| Measured m/z     | Tolerance              | Charge  |
| Check Valence    | Minimum                | Maximum |
| Nitrogen Rule    | Electron Configuration |         |
| Filter H/C Ratio | Minimum                | Maximum |
| Estimate Carbon  |                        |         |

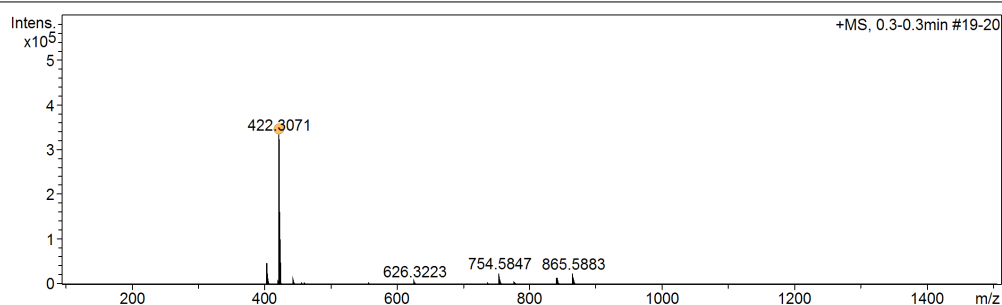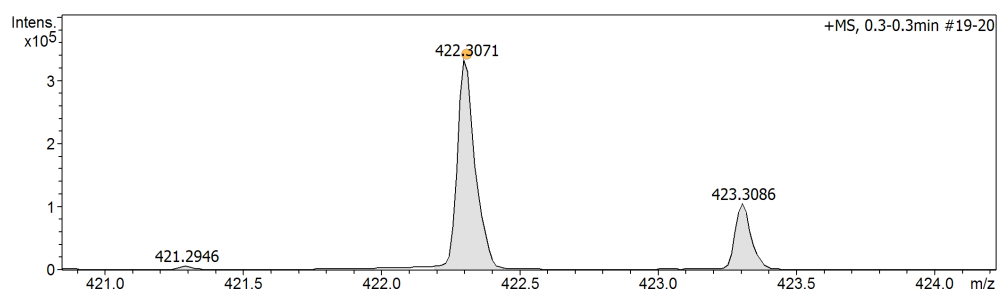

| Meas. m/z | # | Ion Formula | m/z      | err [ppm] | mSigma | # Sigma | Score  | rdb | e <sup>-</sup> Conf | N-Rule |
|-----------|---|-------------|----------|-----------|--------|---------|--------|-----|---------------------|--------|
| 422.3071  | 1 | C28H40NO2   | 422.3054 | 4.1       | 3.0    | 1       | 100.00 | 9.5 | even                | ok     |

**Figure S54.** HRMS spectrum of paspaline (**11**)

## 11 Paspaline B (12)

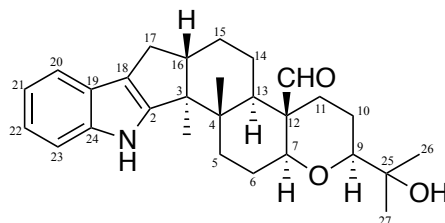

**Table S9.** 1D and 2D NMR (CDCl<sub>3</sub>, 600 MHz) data of paspaline B (**12**)  
(Reported data are shaded in grey)

| Pos.   | $\delta_{\text{H}}$ , mult. ( $J$ in Hz)                                                 | $\delta_{\text{C}}$ | COSY                                               | $^1\text{H}$ - $^{13}\text{C}$ HMBC | $\delta_{\text{H}}$ , mult. ( $J$ in Hz) [2] | $\delta_{\text{C}}$ [2] |
|--------|------------------------------------------------------------------------------------------|---------------------|----------------------------------------------------|-------------------------------------|----------------------------------------------|-------------------------|
| 1-NH   | 7.67 (s, 1H)                                                                             | -                   | -                                                  | 18, 19, 24                          | 7.69, s                                      | -                       |
| 2      | -                                                                                        | 149.9               | -                                                  | -                                   | -                                            | 150.0                   |
| 3      | -                                                                                        | 51.9                | -                                                  | -                                   | -                                            | 52.0                    |
| 4      | -                                                                                        | 39.9                | -                                                  | -                                   | -                                            | 39.9                    |
| 5      | <i>a</i> 2.02 (dd, 1H, $J = 13.1, 3.9$ Hz)<br><i>b</i> 1.71 (dd, 1H, $J = 10.2, 3.8$ Hz) | 33.2                | 6 <i>a</i> , 5 <i>b</i> , 6 <i>b</i><br>5 <i>a</i> | -                                   | 2.07<br>1.72                                 | 33.2<br>33.2            |
| 6      | <i>a</i> 2.24 (dd, 1H, $J = 12.3, 3.8$ Hz)<br><i>b</i> 1.99 (m, 1H)                      | 24.8                | 7, 6 <i>b</i> , 5 <i>b</i><br>7, 6 <i>a</i>        | -                                   | 2.04<br>1.24                                 | 24.9<br>24.9            |
| 7      | 3.30 (dd, 1H, $J = 12.3, 4.6$ Hz)                                                        | 83.6                | 6 <i>a</i> , 6 <i>b</i>                            | -                                   | 3.32                                         | 83.6                    |
| 9      | 3.25 (dd, 1H, $J = 11.7, 2.4$ Hz)                                                        | 84.8                | 10 <i>b</i>                                        | 25                                  | 3.28                                         | 85.0                    |
| 10     | <i>a</i> 1.52*<br><i>b</i> 1.27 (m, 1H)                                                  | 23.1                | -<br>7                                             | -                                   | 1.55<br>1.29                                 | 23.4<br>23.4            |
| 11     | <i>a</i> 2.47 (m, 1H)<br><i>b</i> 1.17 (m, 1H)                                           | 34.1                | 11 <i>b</i><br>11 <i>a</i>                         | -<br>9                              | 2.49<br>1.22                                 | 33.9<br>33.9            |
| 12     | -                                                                                        | 50.6                | -                                                  | -                                   | -                                            | 50.7                    |
| 13     | 1.68 (dd, 1H, $J = 12.2, 3.5$ Hz)                                                        | 47.6                | -                                                  | -                                   | 1.69                                         | 47.6                    |
| 14     | <i>a</i> 1.86 (m, 1H)<br><i>b</i> 1.52*                                                  | 22.4                | 13<br>-                                            | 16<br>-                             | 1.90<br>1.55                                 | 22.4<br>22.4            |
| 15     | <i>a</i> 1.76 (m, 1H)<br><i>b</i> 1.56*                                                  | 24.7                | 15 <i>b</i><br>-                                   | -                                   | 1.80<br>1.55                                 | 24.9<br>24.9            |
| 16     | 2.68 <sup>a</sup> (m, 1H)                                                                | 48.7                | -                                                  | -                                   | 2.70                                         | 48.7                    |
| 17     | <i>a</i> 2.66 <sup>a</sup> (m, 1H)<br><i>b</i> 2.31 (m, 1H)                              | 27.3                | -<br>17 <i>a</i>                                   | 2, 18, 16<br>18                     | 2.68<br>2.32                                 | 27.4<br>27.4            |
| 18     | -                                                                                        | 118.4               | -                                                  | -                                   | -                                            | 118.0                   |
| 19     | -                                                                                        | 125.7               | -                                                  | -                                   | -                                            | 125.7                   |
| 20     | 7.40 (dd, 1H, $J = 7.5, 1.6$ Hz)                                                         | 118.5               | 21 <sup>b</sup>                                    | 22, 24                              | 7.41                                         | 118.6                   |
| 21     | 7.05 <sup>b</sup> (m, 1H)                                                                | 119.6               | -                                                  | -                                   | 7.07                                         | 119.7                   |
| 22     | 7.06 <sup>b</sup> (m, 1H)                                                                | 120.6               | -                                                  | -                                   | 7.06                                         | 120.7                   |
| 23     | 7.26 (dd, 1H, $J = 7.8, 1.6$ Hz)                                                         | 111.4               | 22 <sup>b</sup>                                    | 21, 19                              | 7.29                                         | 111.5                   |
| 24     | -                                                                                        | 140.0               | -                                                  | -                                   | -                                            | 140.0                   |
| 25     | -                                                                                        | -                   | -                                                  | -                                   | -                                            | 71.9                    |
| 26     | 1.10 (s, 3H)                                                                             | 23.7                | -                                                  | 9, 25, 26                           | 1.12                                         | 23.8                    |
| 27     | 1.14 (s, 3H)                                                                             | 25.7                | -                                                  | 9, 25, 27                           | 1.17                                         | 25.8                    |
| 3-Me   | 0.98 (s, 3H)                                                                             | 14.8                | -                                                  | 2, 3, 4, 16                         | 1.01                                         | 14.8                    |
| 4-Me   | 0.91 (s, 3H)                                                                             | 19.6                | -                                                  | 3, 4, 5, 13                         | 0.94                                         | 19.7                    |
| 12-CHO | 10.11 (s, 1H)                                                                            | 207.2               | -                                                  | 12                                  | 10.13                                        | 207.3                   |

<sup>a-b</sup> Resonances with the same superscript within a column are overlapping and assignments may be interchanged

\* Obscured by H<sub>2</sub>O signal

\*\* Literature data were recorded ( $^1\text{H}$  NMR in 300 MHz and  $^{13}\text{C}$  NMR in 75 MHz) in CDCl<sub>3</sub>

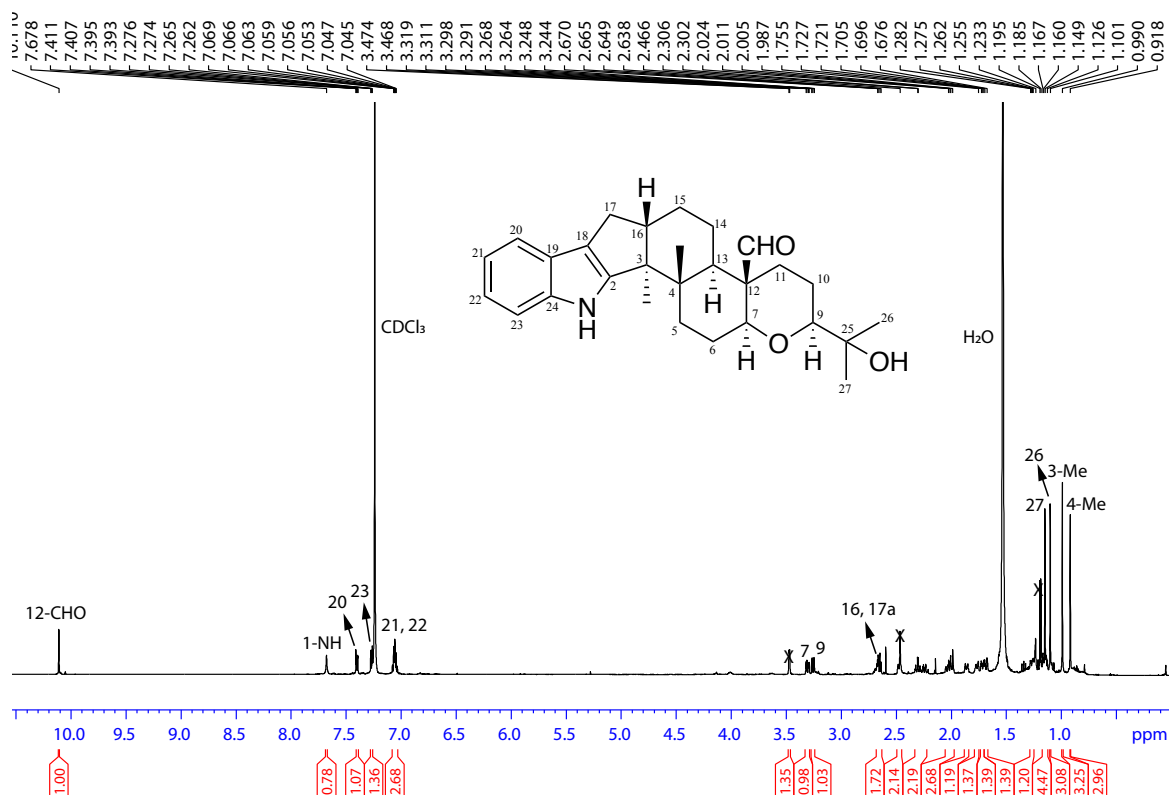

**Figure S55.** <sup>1</sup>H NMR (CDCl<sub>3</sub>) spectrum of paspaline B (12)

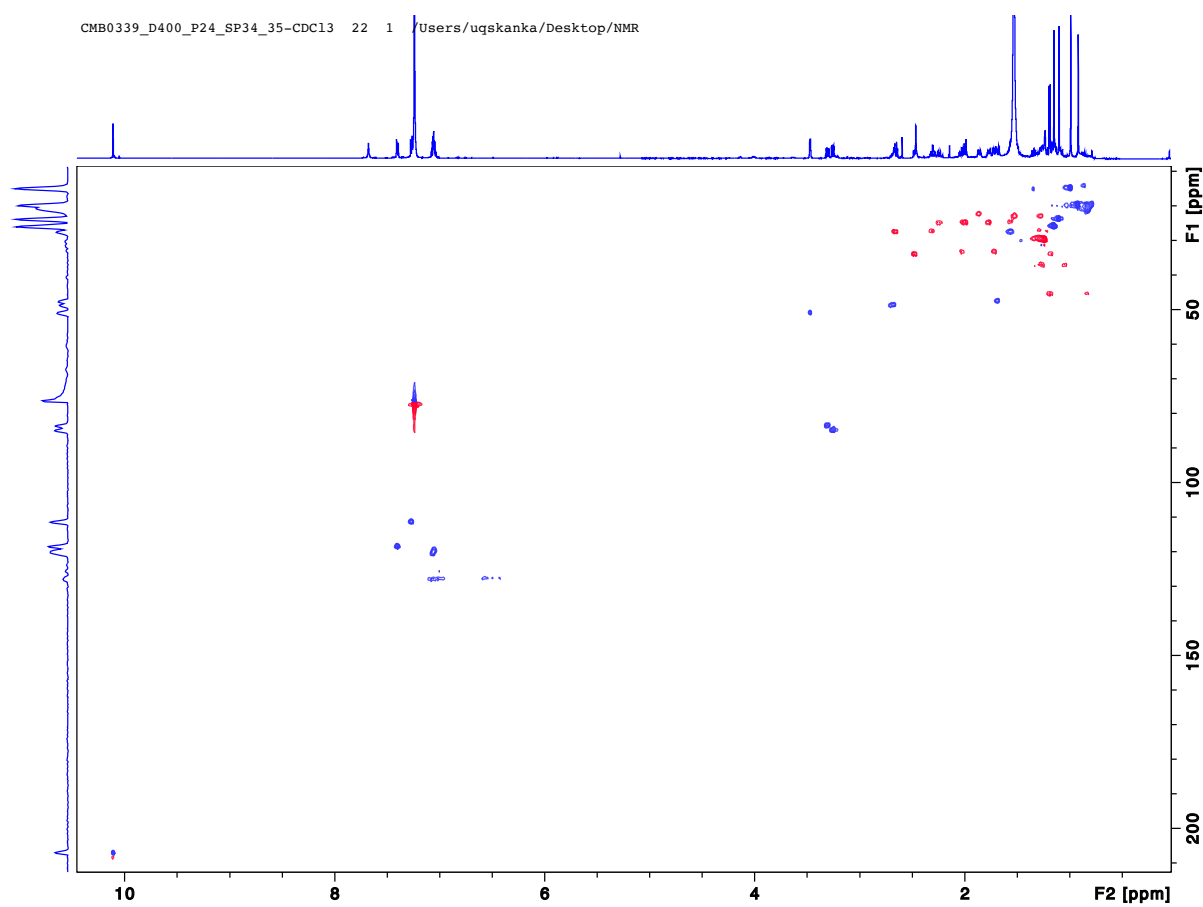

**Figure S56.** HSQC (CDCl<sub>3</sub>) spectrum of paspaline B (12)

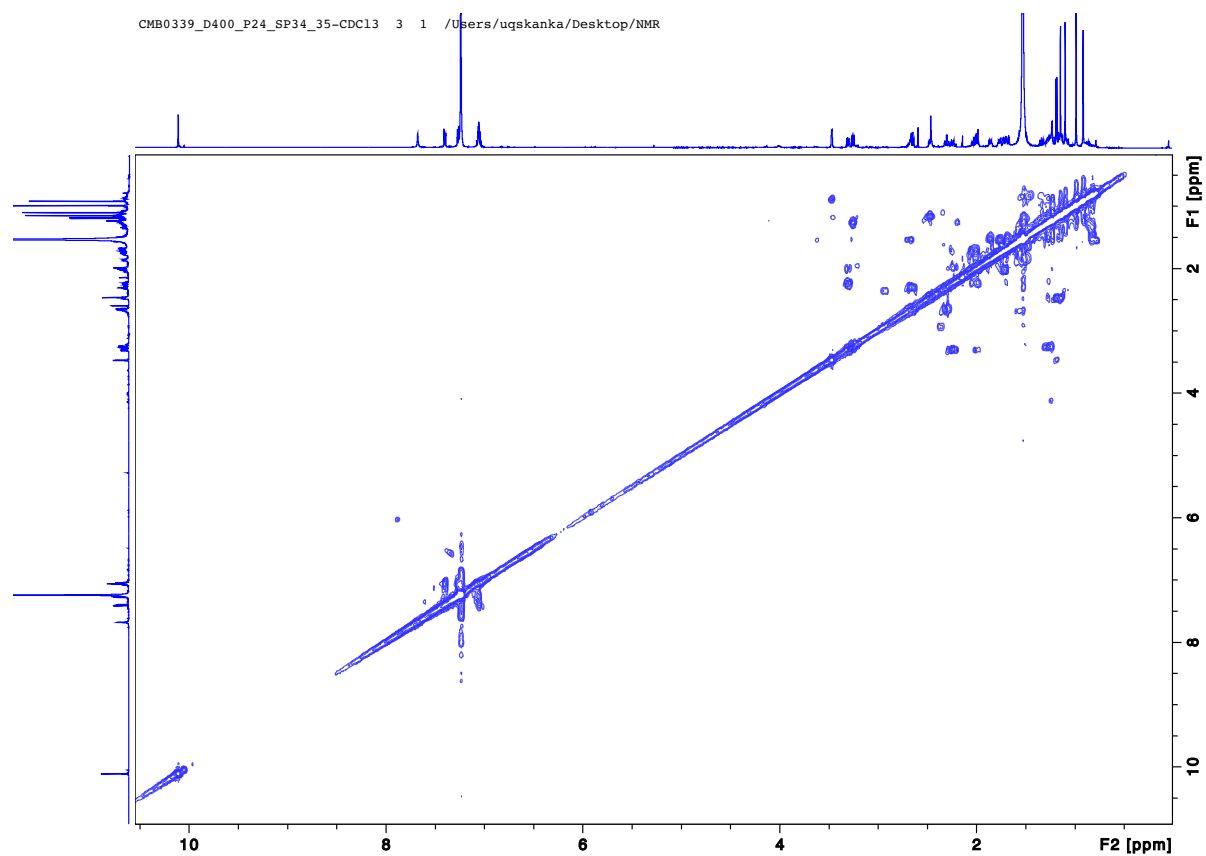

**Figure S57.** COSY (CDCl<sub>3</sub>) spectrum of paspaline B (12)

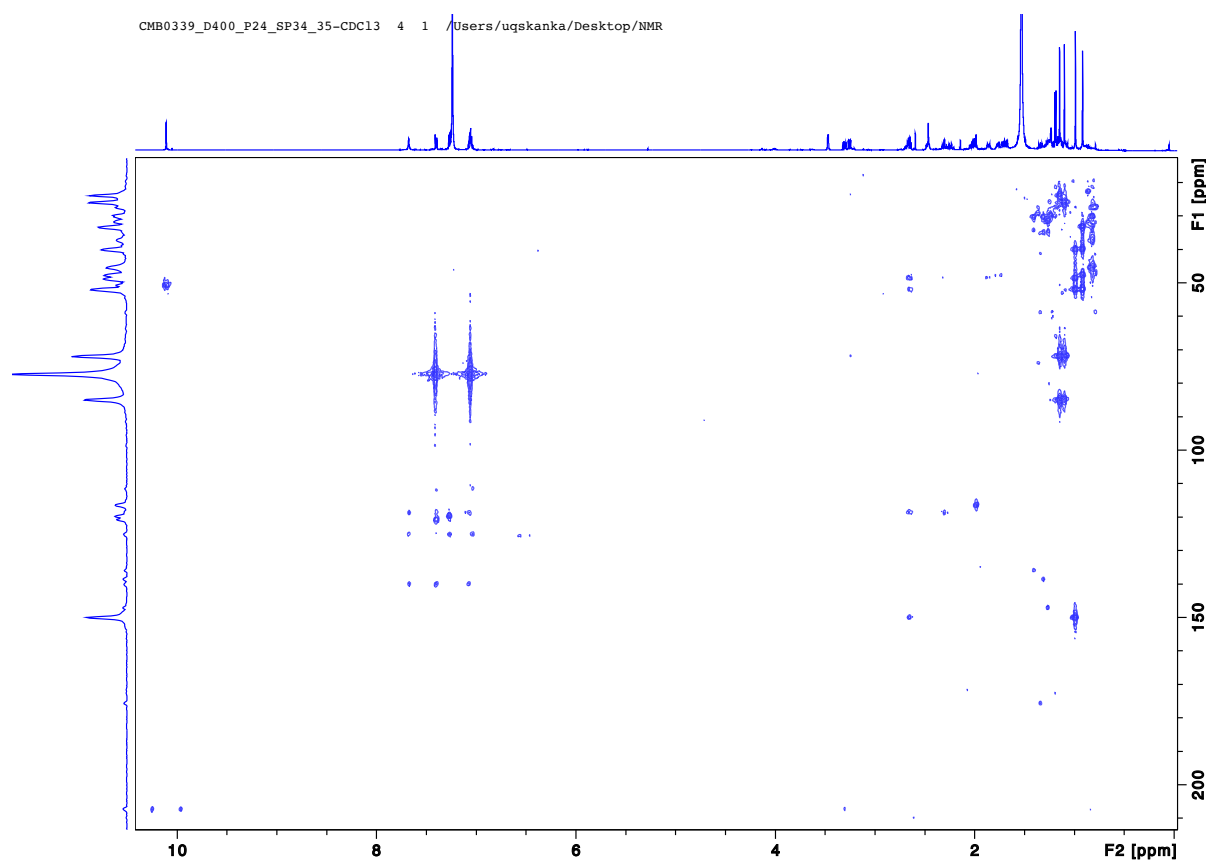

**Figure S58.** HMBC (CDCl<sub>3</sub>) spectrum of paspaline B (12)

## Mass Spectrum Molecular Formula Report

### Analysis Info

Analysis Name D:\Data\s.kankaname\CMB0339\_D400\_P24\_SP34\_35.d  
 Method tune-medhigh\_AP.m  
 Sample Name CMB0339\_D400\_P24\_SP34\_35  
 Comment

Acquisition Date 9/8/2021 11:13:58 AM

Operator a.salim  
 Instrument / Ser# micrOTOF 213750.00  
 232

### Acquisition Parameter

|             |            |                      |          |                  |           |
|-------------|------------|----------------------|----------|------------------|-----------|
| Source Type | ESI        | Ion Polarity         | Positive | Set Nebulizer    | 0.5 Bar   |
| Focus       | Not active |                      |          | Set Dry Heater   | 180 °C    |
| Scan Begin  | 100 m/z    | Set Capillary        | 4500 V   | Set Dry Gas      | 5.0 l/min |
| Scan End    | 1500 m/z   | Set End Plate Offset | -500 V   | Set Divert Valve | Source    |

### Generate Molecular Formula Parameter

|                  |                        |         |
|------------------|------------------------|---------|
| Formula, min.    |                        |         |
| Formula, max.    |                        |         |
| Measured m/z     | Tolerance              | Charge  |
| Check Valence    | Minimum                | Maximum |
| Nitrogen Rule    | Electron Configuration |         |
| Filter H/C Ratio | Minimum                | Maximum |
| Estimate Carbon  |                        |         |

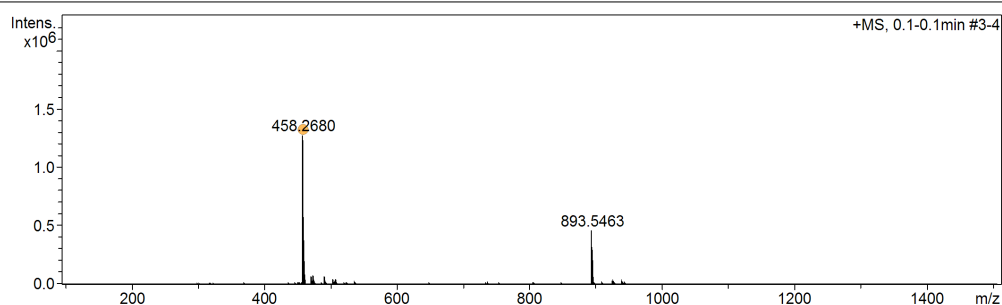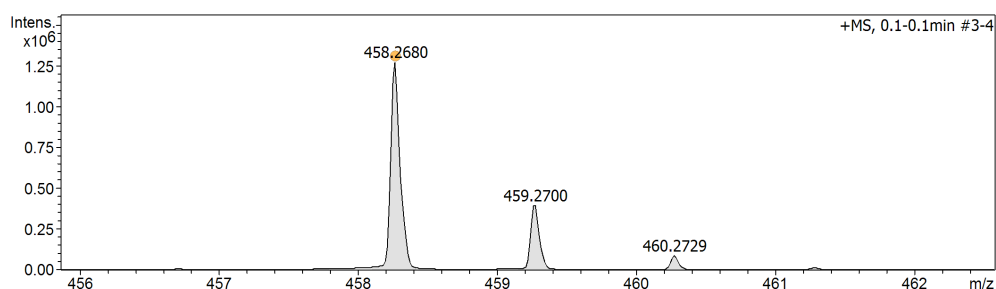

| Meas. m/z | # | Ion Formula | m/z      | err [ppm] | mSigma | # Sigma | Score  | rdb  | e <sup>-</sup> Conf | N-Rule |
|-----------|---|-------------|----------|-----------|--------|---------|--------|------|---------------------|--------|
| 458.2680  | 1 | C28H37NNaO3 | 458.2666 | -3.2      | 8.1    | 1       | 100.00 | 10.5 | even                | ok     |

**Figure S59.** HRMS spectrum of paspaline B (12)

## 12 12-demethylpaspaline-12-carboxylic acid (13)

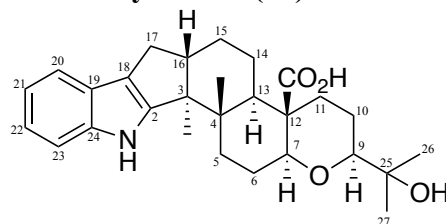

**Table S10.** 1D and 2D NMR (DMSO-*d*<sub>6</sub>, 600 MHz) data of 12-demethylpaspaline-12-carboxylic acid (**13**) (Reported data are shaded in grey)

| Pos.                 | $\delta_{\text{H}}$ , mult. ( <i>J</i> in Hz)                                          | $\delta_{\text{C}}$ | COSY                                                  | $^1\text{H}$ - $^{13}\text{C}$ HMBC                                                                                   | $\delta_{\text{H}}$ (mult., <i>J</i> (Hz) [1])                                                      | $\delta_{\text{C}}$ [1] |
|----------------------|----------------------------------------------------------------------------------------|---------------------|-------------------------------------------------------|-----------------------------------------------------------------------------------------------------------------------|-----------------------------------------------------------------------------------------------------|-------------------------|
| 1-NH                 | 10.58 (s, 1H)                                                                          | -                   | -                                                     | 2, 18, 19, 24                                                                                                         | -                                                                                                   | -                       |
| 2                    | -                                                                                      | 151.4               | -                                                     | -                                                                                                                     | -                                                                                                   | 151.0                   |
| 3                    | -                                                                                      | 52.1                | -                                                     | -                                                                                                                     | -                                                                                                   | 51.7                    |
| 4                    | -                                                                                      | 40.0                | -                                                     | -                                                                                                                     | -                                                                                                   | 40.2                    |
| 5                    | <i>a</i> 1.98 (br d, 1H, <i>J</i> = 12.7 Hz)<br><i>b</i> 1.82 <sup>a</sup> (m, 1H)     | 32.2                | 6 <i>a</i> , 5 <i>b</i> <sup>a</sup>                  | 4, 6, 7, 13, 4-Me                                                                                                     | <i>a</i> 1.97 (dt, 1H, <i>J</i> = 12.6, 3.1 Hz)<br><i>b</i> 1.83 (m, 1H)                            | 32.4                    |
| 6                    | <i>a</i> 1.61 <sup>b</sup> (m, 1H)<br><i>b</i> 2.55 <sup>c</sup> (m, 1H)               | 25.0                | -                                                     | -                                                                                                                     | <i>a</i> 1.61 (m, 1H)<br><i>b</i> 2.54 (m, 1H)                                                      | 25.2                    |
| 7                    | 3.11 <sup>d</sup> (br d, 1H, <i>J</i> = 11.3 Hz)                                       | 83.9 <sup>g</sup>   | 10 <i>b</i>                                           | -                                                                                                                     | 3.10 (dd, 1H, <i>J</i> = 11.0, 2.3 Hz)                                                              | 83.7                    |
| 9                    | 3.11 <sup>d</sup> (br d, 1H, <i>J</i> = 11.3 Hz)                                       | 83.9 <sup>g</sup>   | 10 <i>b</i>                                           | -                                                                                                                     | 3.12 (dd, 1H, <i>J</i> = 11.1, 2.2 Hz)                                                              | 84.3                    |
| 10                   | <i>a</i> 1.62 <sup>b</sup> (m, 1H)<br><i>b</i> 1.19 (m, 1H)                            | 22.5                | -                                                     | -                                                                                                                     | <i>a</i> 1.65 (m, 1H)<br><i>b</i> 1.18 (m, 1H)                                                      | 22.8                    |
| 11                   | <i>a</i> 2.36 (br d, 1H, <i>J</i> = 11.6 Hz)<br><i>b</i> 1.24 (m, 1H)                  | 35.0                | 11 <i>b</i> , 10 <i>a</i> <sup>b</sup><br>11 <i>a</i> | 9 <sup>d</sup> , 11<br>10, 12, 7 <sup>d</sup> , 9 <sup>d</sup> , 12-CO <sub>2</sub> H<br>12, 10, 12-CO <sub>2</sub> H | <i>a</i> 2.35 (d, 1H, <i>J</i> = 11.4 Hz)<br><i>b</i> 1.23 (m, 1H)                                  | 35.3                    |
| 12                   | -                                                                                      | 47.8                | -                                                     | -                                                                                                                     | -                                                                                                   | 47.3                    |
| 13                   | 1.67 <sup>e</sup> (m, 1H)                                                              | 45.8                | -                                                     | -                                                                                                                     | 1.67 (m, 1H)                                                                                        | 46.1                    |
| 14                   | <i>a</i> 1.68 <sup>e</sup> (m, 1H)<br><i>b</i> 1.82 <sup>a</sup> (m, 1H)               | 23.1                | -                                                     | -                                                                                                                     | <i>a</i> 1.61 (m, 1H)<br><i>b</i> 1.81 (m, 1H)                                                      | 21.6                    |
| 15                   | <i>a</i> 1.68 <sup>e</sup> (m, 1H)<br><i>b</i> 1.50 (m, 1H)                            | 24.5                | -                                                     | -                                                                                                                     | <i>a</i> 1.69 (m, 1H)<br><i>b</i> 1.50 (m, 1H)                                                      | 24.8                    |
| 16                   | 2.62 (m, 1H)                                                                           | 48.4                | 15 <i>b</i> , 17 <i>b</i>                             | 3, 17, 3-Me                                                                                                           | 2.61 (m, 1H)                                                                                        | 48.7                    |
| 17                   | <i>a</i> 2.57 <sup>c</sup> (m, 1H)<br><i>b</i> 2.24 (dd, 1H, <i>J</i> = 12.6, 11.0 Hz) | 26.7                | -<br>16, 17 <i>a</i> <sup>c</sup>                     | -<br>2, 15, 16, 18                                                                                                    | <i>a</i> 2.57 (dd, 1H, <i>J</i> = 12.9, 6.4 Hz)<br><i>b</i> 2.24 (dd, 1H, <i>J</i> = 12.9, 10.6 Hz) | 27.0                    |
| 18                   | -                                                                                      | 116.2               | -                                                     | -                                                                                                                     | -                                                                                                   | 115.9                   |
| 19                   | -                                                                                      | 124.9               | -                                                     | -                                                                                                                     | -                                                                                                   | 124.4                   |
| 20                   | 7.25 <sup>f</sup> (dd, 1H, <i>J</i> = 7.4, 2.6 Hz)                                     | 117.3               | -                                                     | -                                                                                                                     | 7.24 (d, 1H, <i>J</i> = 7.9 Hz)                                                                     | 117.7                   |
| 21                   | 6.89 (t, 1H, <i>J</i> = 7.4 Hz)                                                        | 118.1               | 20 <sup>f</sup> , 22                                  | 19, 23                                                                                                                | 6.89 (t, 1H, <i>J</i> = 7.9 Hz)                                                                     | 118.5                   |
| 22                   | 6.93 (t, 1H, <i>J</i> = 7.4 Hz)                                                        | 119.0               | 21, 23 <sup>f</sup>                                   | 20, 24                                                                                                                | 6.93 (t, 1H, <i>J</i> = 7.9 Hz)                                                                     | 119.4                   |
| 23                   | 7.25 <sup>f</sup> (dd, 1H, <i>J</i> = 7.4, 2.6 Hz)                                     | 111.6               | -                                                     | -                                                                                                                     | 7.26 (d, 1H, <i>J</i> = 7.9 Hz)                                                                     | 111.9                   |
| 24                   | -                                                                                      | 140.7               | -                                                     | -                                                                                                                     | -                                                                                                   | 140.3                   |
| 25                   | -                                                                                      | 70.8                | -                                                     | -                                                                                                                     | -                                                                                                   | 70.4                    |
| 26                   | 0.99 (s, 3H)                                                                           | 24.7                | -                                                     | 9 <sup>d</sup> , 25, 27                                                                                               | 0.99 (s, 3H)                                                                                        | 24.5                    |
| 27                   | 1.08 (s, 3H)                                                                           | 26.7                | -                                                     | 9 <sup>d</sup> , 25, 26                                                                                               | 1.09 (s, 3H)                                                                                        | 27.0                    |
| 12-CO <sub>2</sub> H | -                                                                                      | 175.7               | -                                                     | -                                                                                                                     | -                                                                                                   | 175.4                   |
| 3-Me                 | 0.93 (s, 3H)                                                                           | 14.1                | -                                                     | 2, 3, 4, 16                                                                                                           | 0.92 (s, 3H)                                                                                        | 14.5                    |
| 4-Me                 | 0.97 (s, 3H)                                                                           | 15.7                | -                                                     | 3, 4, 5, 13                                                                                                           | 0.97 (s, 3H)                                                                                        | 16.2                    |
| 25-OH                | 4.04 (s, 1H)                                                                           | -                   | -                                                     | 9 <sup>d</sup> , 25, 26, 27                                                                                           | -                                                                                                   | -                       |

<sup>a-g</sup> Resonances with the same superscript within a column are overlapping and assignments may be interchanged.

\*Literature data were recorded ( $^1\text{H}$  NMR in 600 MHz and  $^{13}\text{C}$  NMR in 150 MHz) in DMSO-*d*<sub>6</sub>

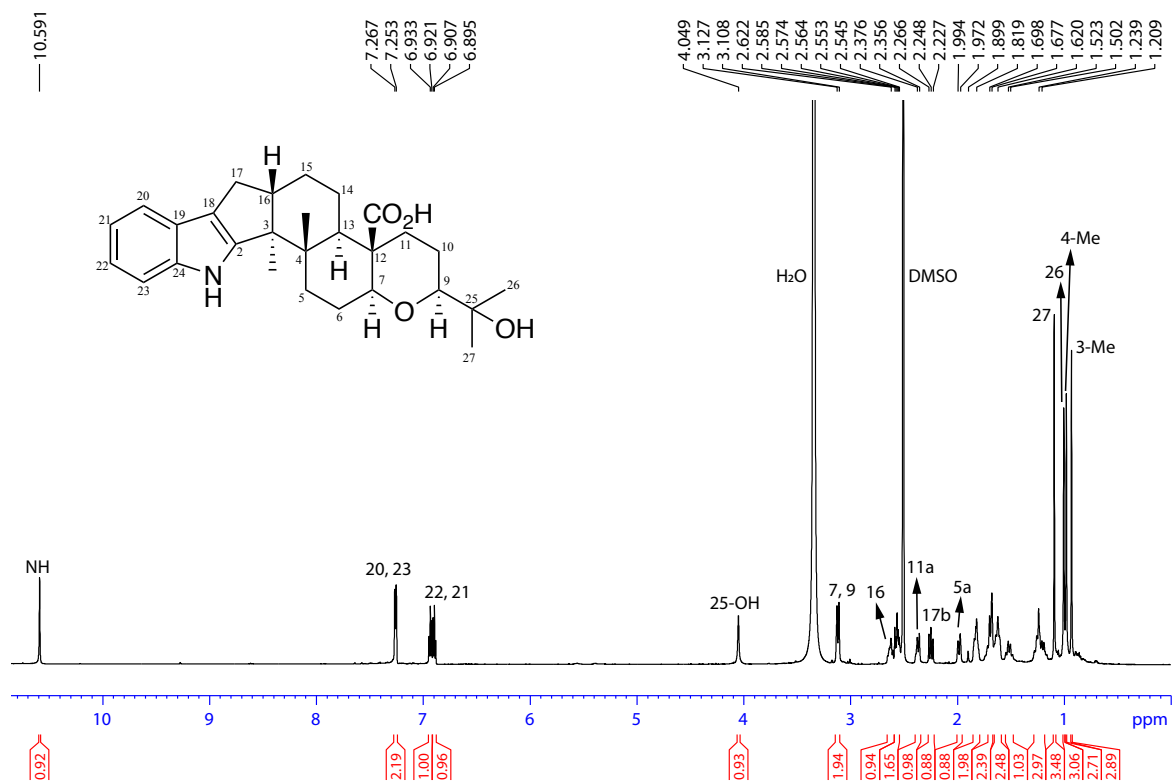

**Figure S60.** <sup>1</sup>H NMR (DMSO-*d*<sub>6</sub>) spectrum of 12-demethylpaspaline-12-carboxylic acid (13)

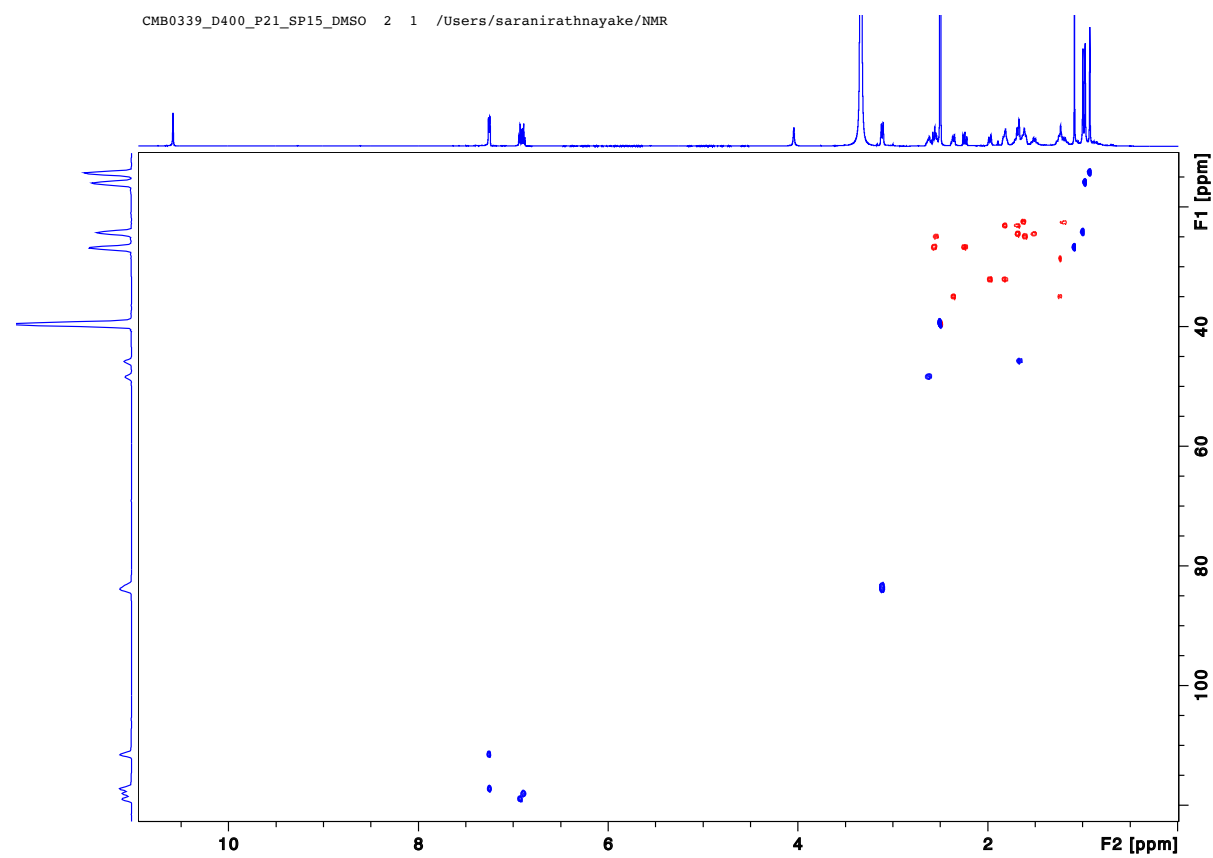

**Figure S61.** HSQC (DMSO-*d*<sub>6</sub>) spectrum of 12-demethylpaspaline-12-carboxylic acid (13)



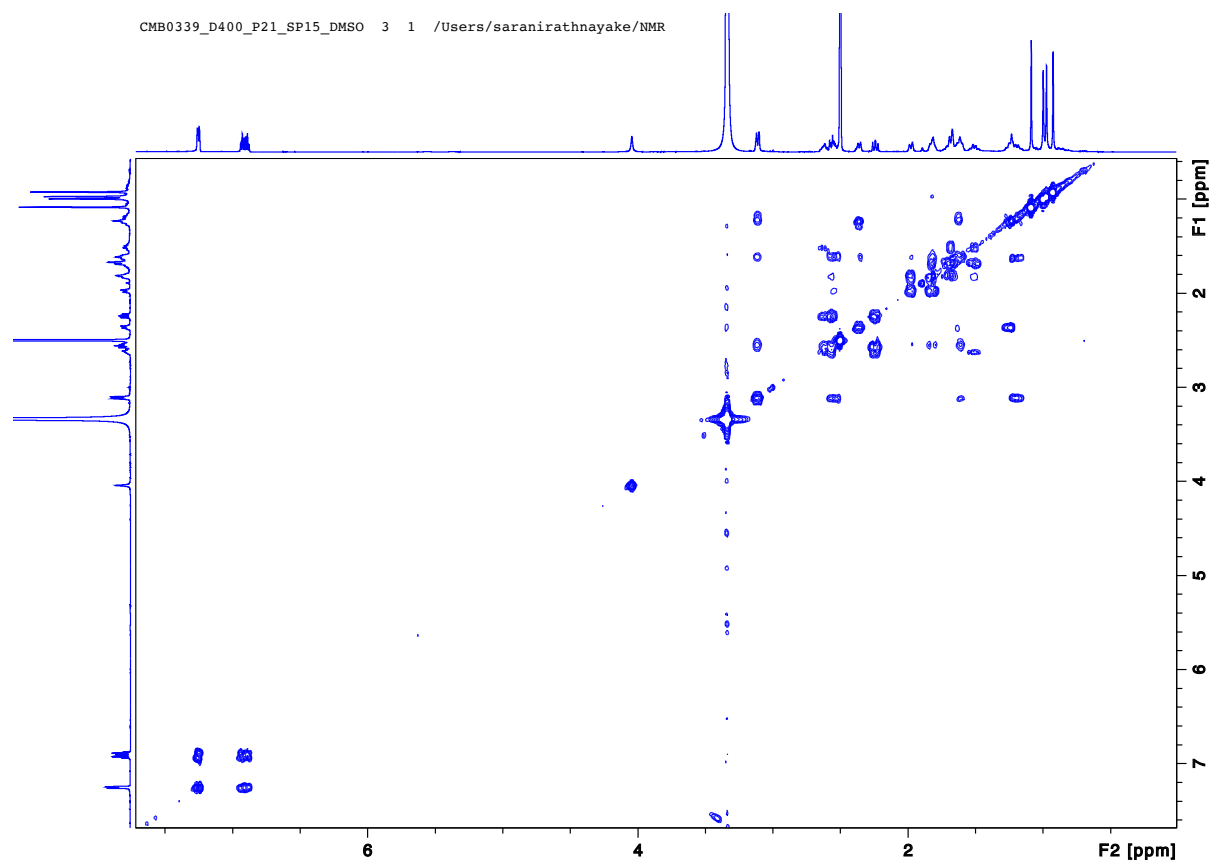

**Figure S62.** COSY (DMSO- $d_6$ ) spectrum of 12-demethylpaspaline-12-carboxylic acid (**13**)

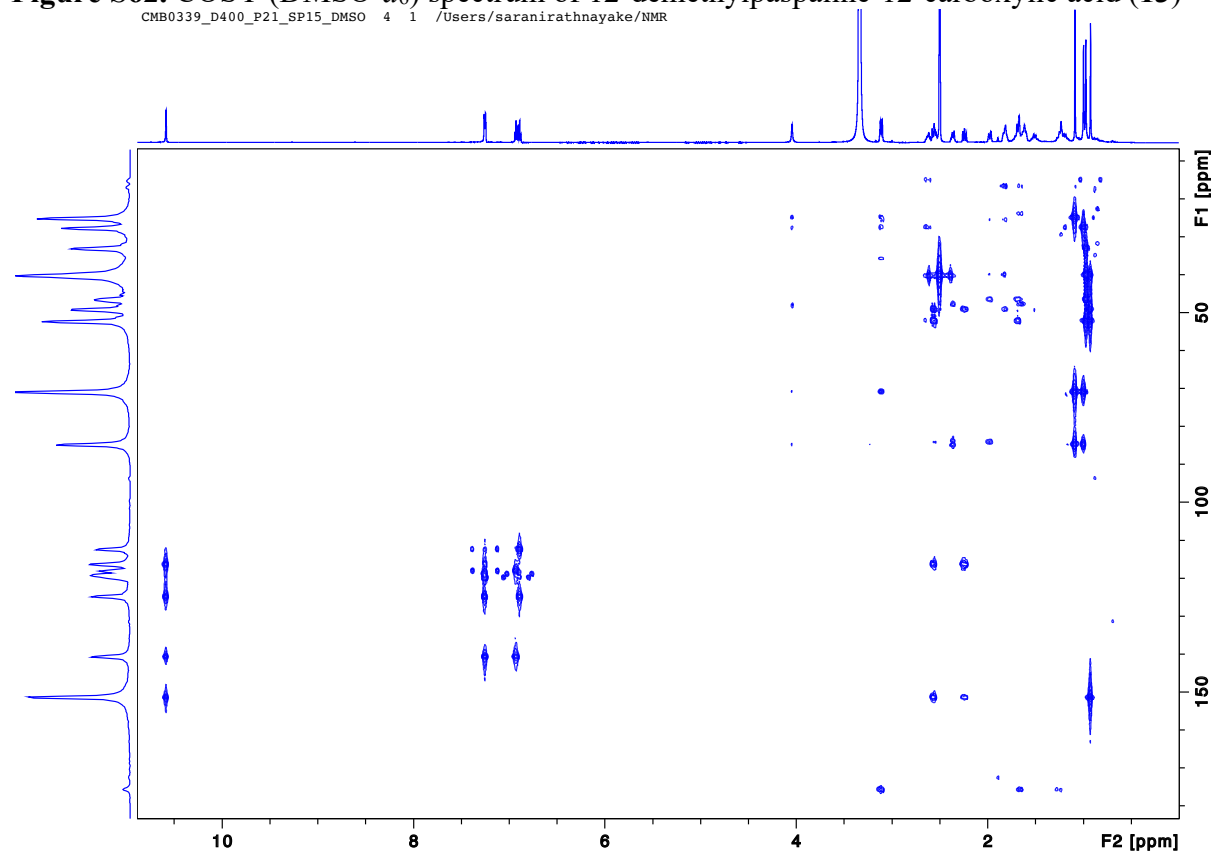

**Figure S63.** HMBC (DMSO- $d_6$ ) spectrum of 12-demethylpaspaline-12-carboxylic acid (**13**)

## Mass Spectrum Molecular Formula Report

### Analysis Info

Analysis Name D:\Data\s.kankaname\CMB0339\_D400\_P21\_SP15.d  
 Method tune-medhigh\_AP.m  
 Sample Name CMB0339\_D400\_P21\_SP15  
 Comment

Acquisition Date 9/8/2021 4:57:44 PM  
 Operator a.salim  
 Instrument / Ser# micrOTOF 213750.00  
 232

### Acquisition Parameter

|             |            |                      |          |                  |           |
|-------------|------------|----------------------|----------|------------------|-----------|
| Source Type | ESI        | Ion Polarity         | Positive | Set Nebulizer    | 0.5 Bar   |
| Focus       | Not active |                      |          | Set Dry Heater   | 180 °C    |
| Scan Begin  | 100 m/z    | Set Capillary        | 4500 V   | Set Dry Gas      | 5.0 l/min |
| Scan End    | 1500 m/z   | Set End Plate Offset | -500 V   | Set Divert Valve | Source    |

### Generate Molecular Formula Parameter

|                  |  |                        |
|------------------|--|------------------------|
| Formula, min.    |  |                        |
| Formula, max.    |  |                        |
| Measured m/z     |  | Tolerance              |
| Check Valence    |  | Minimum                |
| Nitrogen Rule    |  | Electron Configuration |
| Filter H/C Ratio |  | Minimum                |
| Estimate Carbon  |  | Maximum                |

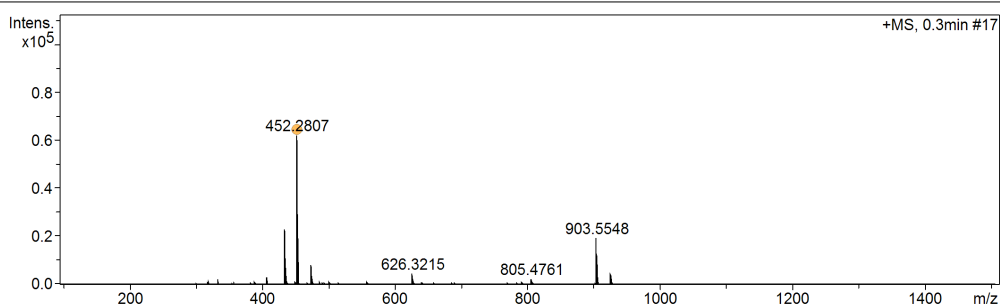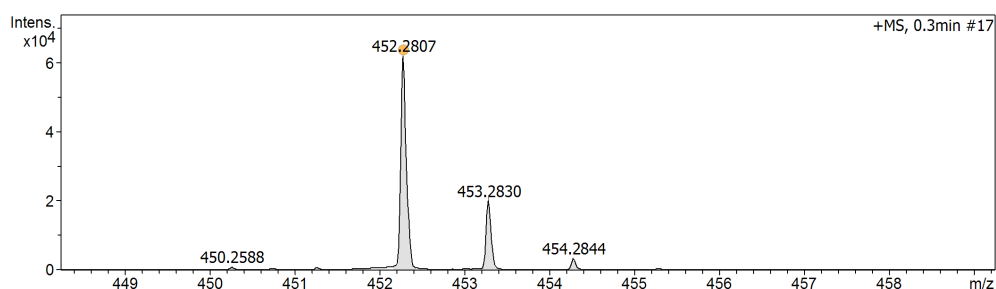

| Meas. m/z | # | Ion Formula | m/z      | err [ppm] | mSigma | # Sigma | Score  | rdb  | e <sup>-</sup> Conf | N-Rule |
|-----------|---|-------------|----------|-----------|--------|---------|--------|------|---------------------|--------|
| 452.2807  | 1 | C28H38NO4   | 452.2795 | 2.7       | 4.7    | 1       | 61.14  | 10.5 | even                | ok     |
|           | 2 | C29H34N5    | 452.2809 | -0.3      | 7.6    | 2       | 100.00 | 15.5 | even                | ok     |
|           | 3 | C26H36N4O3  | 452.2782 | 5.6       | 10.0   | 3       | 20.62  | 11.0 | odd                 | ok     |
|           | 4 | C31H36N2O   | 452.2822 | 3.3       | 13.7   | 4       | 43.26  | 15.0 | odd                 | ok     |
|           | 5 | C24H34N7O2  | 452.2768 | 8.6       | 16.1   | 5       | 4.69   | 11.5 | even                | ok     |
|           | 6 | C25H40O7    | 452.2769 | 8.6       | 21.7   | 6       | 4.19   | 6.0  | odd                 | ok     |

**Figure S64.** HRMS spectrum of 12-demethylpaspaline-12-carboxylic acid (**13**)

### 13 Emindole SB (14)

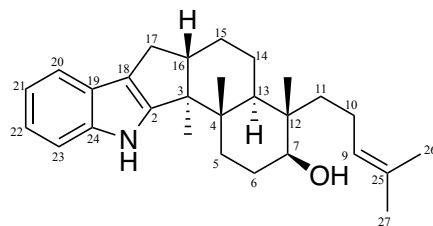

**Table S11.** 1D and 2D NMR (DMSO-*d*<sub>6</sub>, 600 MHz) data of emindole SB (14)  
(Reported data are shaded in grey)

| Pos.  | $\delta_{\text{H}}$ , mult. ( <i>J</i> in Hz)                                                       | $\delta_{\text{C}}$ | COSY                                            | $^1\text{H}$ - $^{13}\text{C}$ HMBC | $\delta_{\text{H}}$ (mult., <i>J</i> (Hz)) [1]          | $\delta_{\text{C}}$ [1] |
|-------|-----------------------------------------------------------------------------------------------------|---------------------|-------------------------------------------------|-------------------------------------|---------------------------------------------------------|-------------------------|
| 1-NH  | 10.55 (s, 1H)                                                                                       | -                   | -                                               | 2, 18, 19, 24                       | 10.55 (s, 1H)                                           | -                       |
| 2     | -                                                                                                   | 151.8               | -                                               | -                                   | -                                                       | 151.3                   |
| 3     | -                                                                                                   | 52.9                | -                                               | -                                   | -                                                       | 52.6                    |
| 4     | -                                                                                                   | 39.2                | -                                               | -                                   | -                                                       | 40.8                    |
| 5     | <i>a</i> 1.85 (m, 1H)<br><i>b</i> 1.68 <sup>a</sup> (m, 1H)                                         | 31.7                | -                                               | 4, 7, 4-Me                          | <i>a</i> 1.84 (m, 1H)<br><i>b</i> 1.68 (m, 1H)          | 32.0                    |
| 6     | <i>a</i> 1.68 <sup>a</sup> (m, 1H)<br><i>b</i> 1.62 (m, 1H)                                         | 27.0                | -                                               | -                                   | <i>a</i> 1.67 (m, 1H)<br><i>b</i> 1.52 (m, 1H)          | 27.4                    |
| 7     | 3.38 (m, 1H)                                                                                        | 71.0                | 7-OH                                            | -                                   | 3.38 (m, 1H)                                            | 71.4                    |
| 9     | 5.09 (t, 1H, <i>J</i> = 7.0 Hz)                                                                     | 124.9               | 10 <i>a</i> , 10 <i>b</i>                       | 26, 27, 10                          | 5.10 (t, 1H, <i>J</i> = 7.4 Hz)                         | 125.2                   |
| 10    | <i>a</i> 1.92 (m, 1H)<br><i>b</i> 1.8 (m, 1H)                                                       | 20.7                | 10 <i>b</i> , 9, 11 <i>b</i><br>10 <i>a</i> , 9 | 9, 11, 25                           | <i>a</i> 1.92 (m, 1H)<br><i>b</i> 1.85 (m, 1H)          | 21.1                    |
| 11    | <i>a</i> 1.56 <sup>b</sup> (m, 1H)<br><i>b</i> 1.10 (ddd, 1H, <i>J</i> = 14.0, 12.6, 4.9 Hz)        | 36.9                | -<br>10 <i>a</i> , 10 <i>b</i>                  | -                                   | <i>a</i> 1.54 (m, 1H)<br><i>b</i> 1.11 (m, 1H)          | 37.2                    |
| 12    | -                                                                                                   | 41.3                | -                                               | -                                   | -                                                       | 38.7                    |
| 13    | 1.66 <sup>a</sup> (m, 1H)                                                                           | 39.1                | -                                               | -                                   | 1.67 (m, 1H)                                            | 39.6                    |
| 14    | <i>a</i> 1.52 (m, 1H)<br><i>b</i> 1.36 (ddd, 1H, <i>J</i> = 15.1, 13.5, 4.7 Hz)                     | 22.1                | 14 <i>b</i> , 15 <i>a</i><br>14 <i>a</i>        | 13, 16                              | <i>a</i> 1.51 (m, 1H)<br><i>b</i> 1.36 (m, 1H)          | 22.4                    |
| 15    | <i>a</i> 1.70 (m, 1H)<br><i>b</i> 1.54 <sup>b</sup> (m, 1H)                                         | 24.7                | 14 <i>a</i> , 16<br>-                           | -                                   | <i>a</i> 1.69 (m, 1H)<br><i>b</i> 1.53 (m, 1H)          | 25.0                    |
| 16    | 2.64 (m, 1H)                                                                                        | 48.2                | 17 <i>a</i> , 17 <i>b</i>                       | -                                   | 2.62 (m, 1H)                                            | 48.7                    |
| 17    | <i>a</i> 2.56 (dd, 1H, <i>J</i> = 13.0, 6.4 Hz)<br><i>b</i> 2.23 (dd, 1H, <i>J</i> = 13.0, 10.8 Hz) | 26.7                | 17 <i>b</i> , 16<br>17 <i>a</i> , 16            | 2, 3, 16, 18<br>2, 16, 18           | 2.56 (dd, 1H, <i>J</i> = (13.0, 6.4 Hz)<br>2.23 (m, 1H) | 27.1<br>27.1            |
| 18    | -                                                                                                   | 116.4               | -                                               | -                                   | -                                                       | 115.9                   |
| 19    | -                                                                                                   | 124.9               | -                                               | -                                   | -                                                       | 124.5                   |
| 20    | 7.25 (d, 1H, <i>J</i> = 7.5 Hz)                                                                     | 117.2               | 21                                              | 22, 24                              | 7.25 (d, 1H, <i>J</i> = 7.8 Hz)                         | 117.6                   |
| 21    | 6.88 (dt, 1H, <i>J</i> = 7.5, 1.3 Hz)                                                               | 118.0               | 20, 22                                          | 19, 23                              | 6.89 (td, 1H, <i>J</i> = 7.0, 1.2 Hz)                   | 118.4                   |
| 22    | 6.92 (dt, 1H, <i>J</i> = 7.5, 0.8 Hz)                                                               | 118.9               | 21, 23                                          | 20, 24                              | 6.93 (td, 1H, <i>J</i> = 7.0, 1.3 Hz)                   | 119.3                   |
| 23    | 7.26 (d, 1H, <i>J</i> = 7.5 Hz)                                                                     | 111.4               | 22                                              | 19, 21                              | 7.26 (d, 1H, <i>J</i> = 7.7 Hz)                         | 111.9                   |
| 24    | -                                                                                                   | 140.7               | -                                               | -                                   | -                                                       | 140.3                   |
| 25    | -                                                                                                   | 130.4               | -                                               | -                                   | -                                                       | 129.9                   |
| 26    | 1.58 (s, 3H)                                                                                        | 17.2                | -                                               | 9, 25, 26                           | 1.59 (s, 3H)                                            | 17.5                    |
| 27    | 1.64 (s, 3H)                                                                                        | 25.2                | -                                               | 9, 25, 27                           | 1.65 (s, 3H)                                            | 25.6                    |
| 12-Me | 0.71 (s, 3H)                                                                                        | 16.6                | -                                               | 7, 11, 12, 13                       | 0.71 (s, 3H)                                            | 16.9                    |
| 3-Me  | 0.94 (s, 3H)                                                                                        | 14.4                | -                                               | 2, 3, 4, 16                         | 0.93 (s, 3H)                                            | 14.6                    |
| 4-Me  | 1.01 (s, 3H)                                                                                        | 18.4                | -                                               | 3, 4, 5, 13                         | 1.01 (s, 3H)                                            | 18.7                    |
| 7-OH  | 4.32 (d, 1H, <i>J</i> = 5.0 Hz)                                                                     | -                   | 7                                               | -                                   | 4.36 (d, 1H, <i>J</i> = 5.2 Hz)                         | -                       |

<sup>a-b</sup> Resonances with the same superscript are overlapping and assignments may be interchanged

\*Literature data were recorded ( $^1\text{H}$  NMR in 600 MHz and  $^{13}\text{C}$  NMR in 150 MHz) in DMSO-*d*<sub>6</sub>

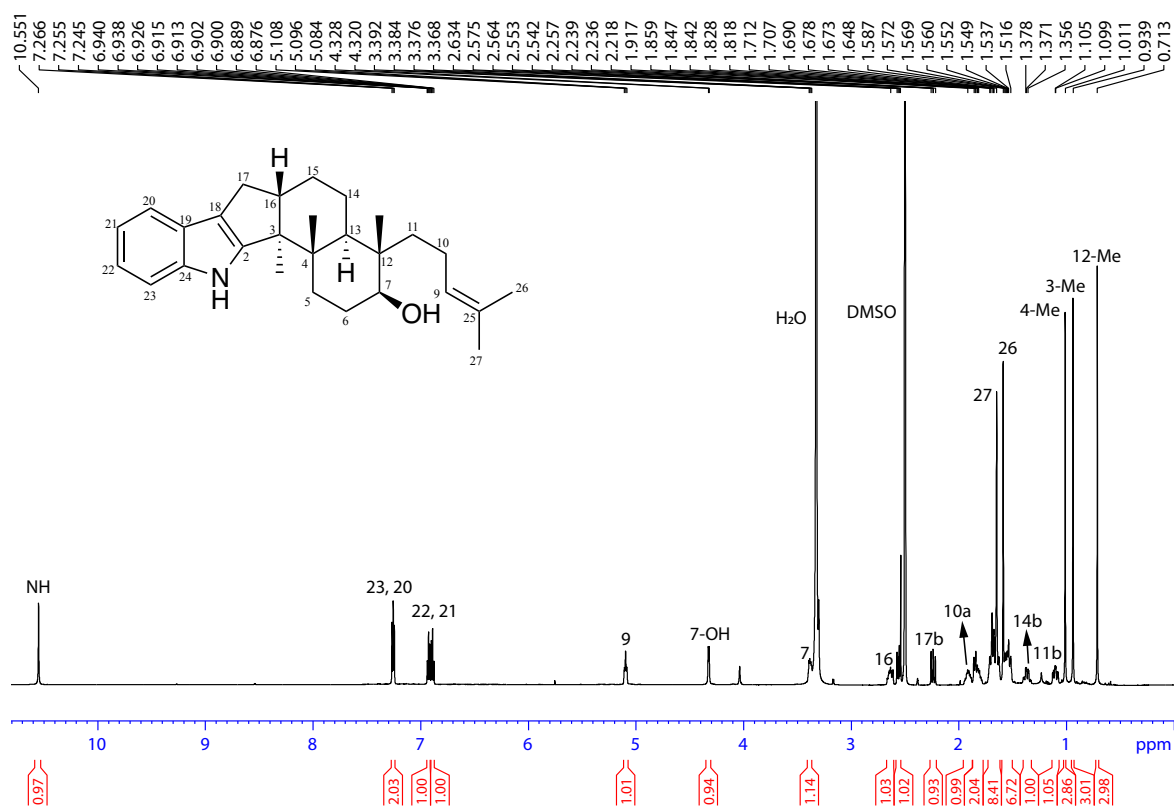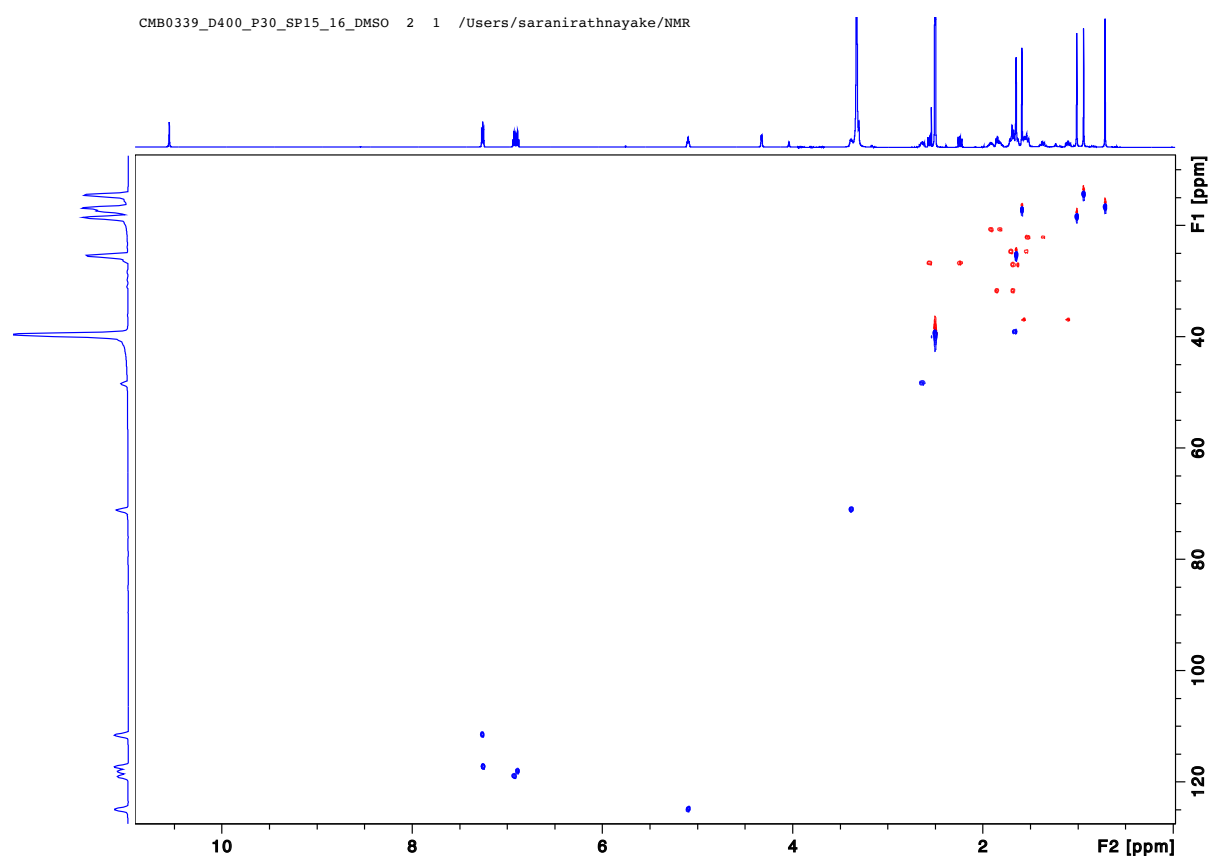

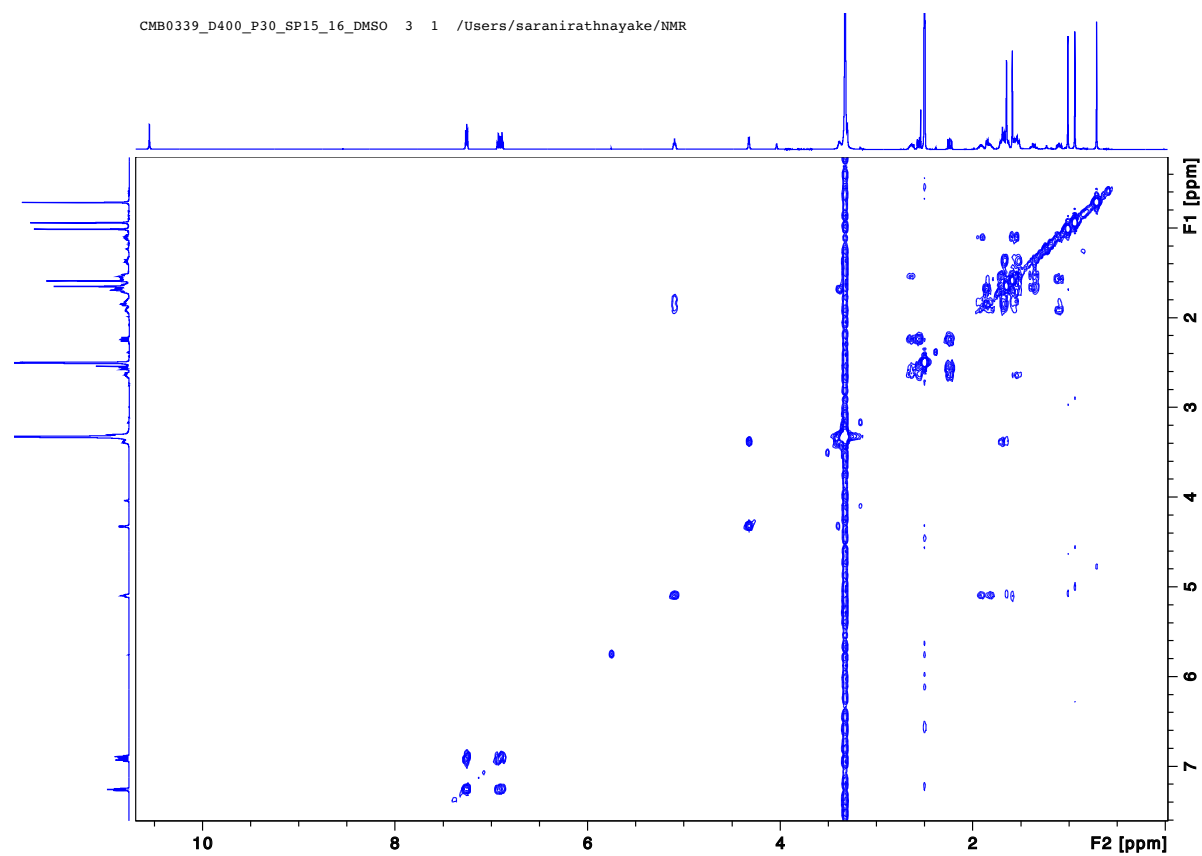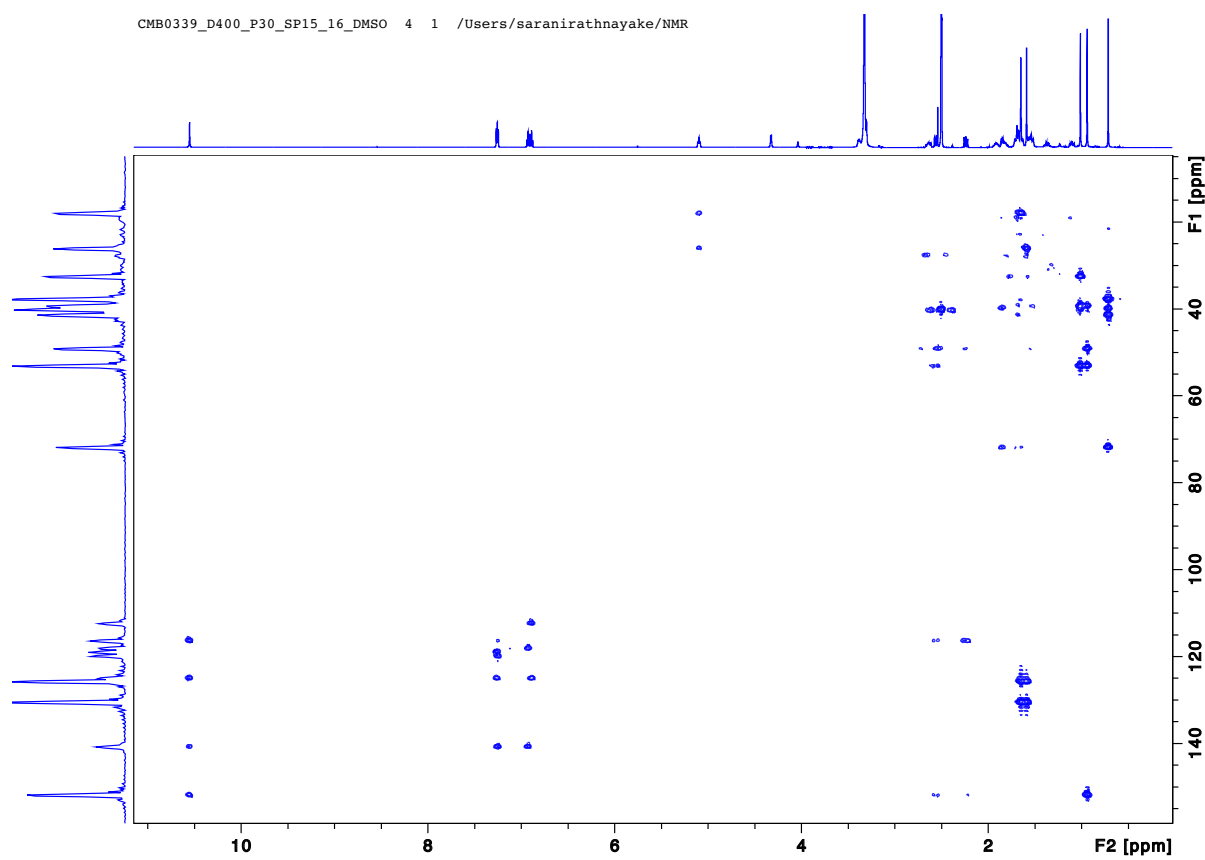

## Mass Spectrum Molecular Formula Report

### Analysis Info

Analysis Name D:\Data\s.kankaname\CMB0339\_D400\_P30\_SP15\_16.d  
 Method tune-medhigh\_AP.m  
 Sample Name CMB0339\_D400\_P30\_SP15\_16  
 Comment

Acquisition Date 9/8/2021 4:54:59 PM  
 Operator a.salim  
 Instrument / Ser# micrOTOF 213750.00  
 232

### Acquisition Parameter

|             |            |                      |          |                  |           |
|-------------|------------|----------------------|----------|------------------|-----------|
| Source Type | ESI        | Ion Polarity         | Positive | Set Nebulizer    | 0.5 Bar   |
| Focus       | Not active |                      |          | Set Dry Heater   | 180 °C    |
| Scan Begin  | 100 m/z    | Set Capillary        | 4500 V   | Set Dry Gas      | 5.0 l/min |
| Scan End    | 1500 m/z   | Set End Plate Offset | -500 V   | Set Divert Valve | Source    |

### Generate Molecular Formula Parameter

|                  |                        |         |
|------------------|------------------------|---------|
| Formula, min.    |                        |         |
| Formula, max.    |                        |         |
| Measured m/z     | Tolerance              | Charge  |
| Check Valence    | Minimum                | Maximum |
| Nitrogen Rule    | Electron Configuration |         |
| Filter H/C Ratio | Minimum                | Maximum |
| Estimate Carbon  |                        |         |

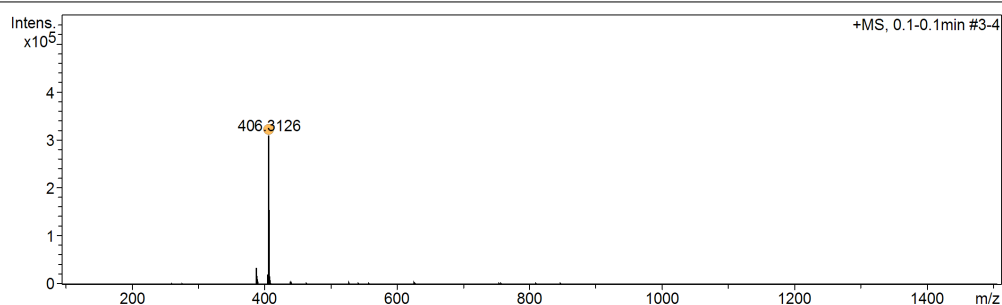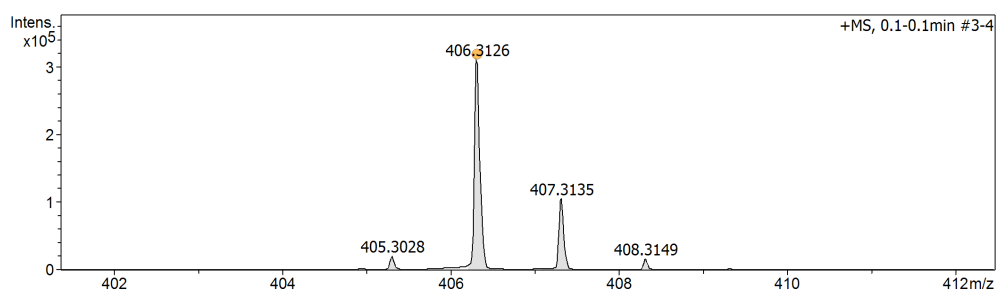

| Meas. m/z | # | Ion Formula | m/z      | err [ppm] | mSigma | # Sigma | Score  | rdB | e <sup>-</sup> Conf | N-Rule |
|-----------|---|-------------|----------|-----------|--------|---------|--------|-----|---------------------|--------|
| 406.3126  | 1 | C28H40NO    | 406.3104 | 5.3       | 12.5   | 1       | 100.00 | 9.5 | even                | ok     |

**Figure S69.** HRMS spectrum of emindole SB (**14**)

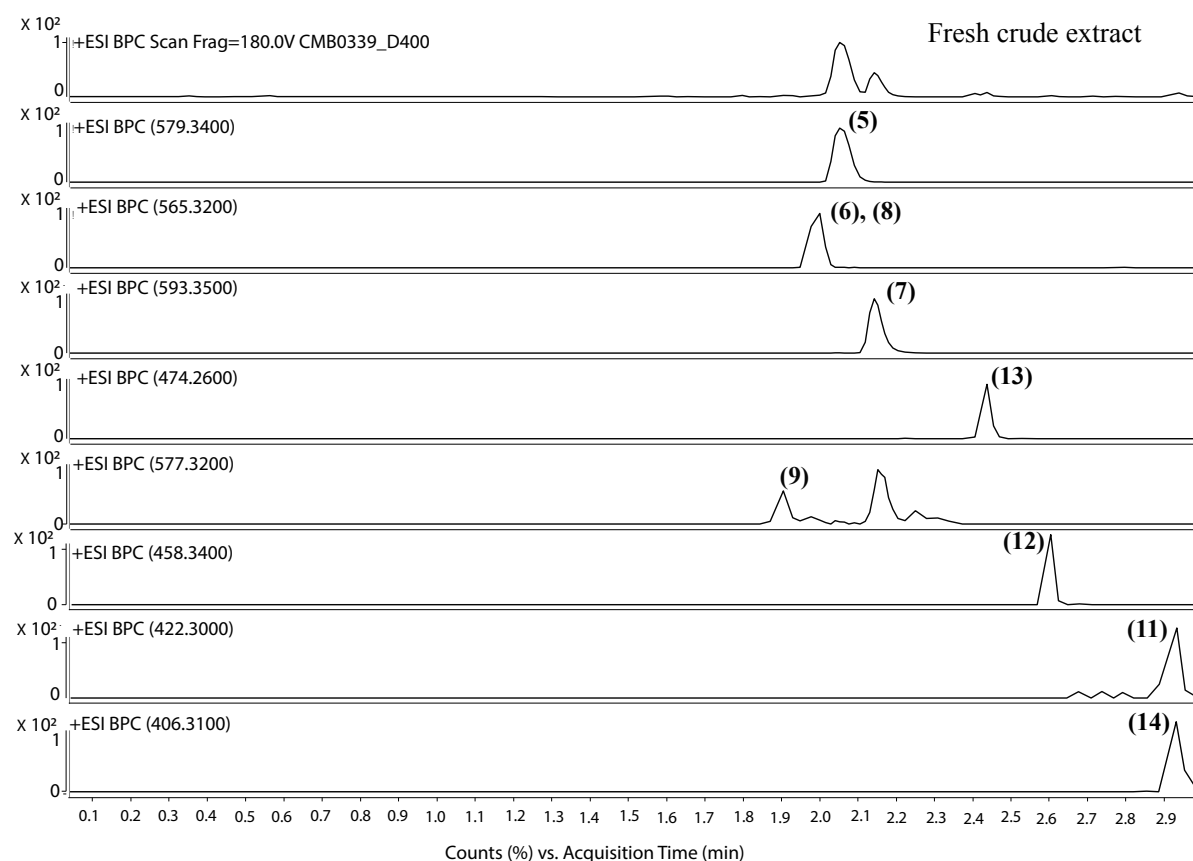

**Figure S70.** Single ion extraction of CMB-M0339 fresh crude extract to show the presence of isolated metabolites

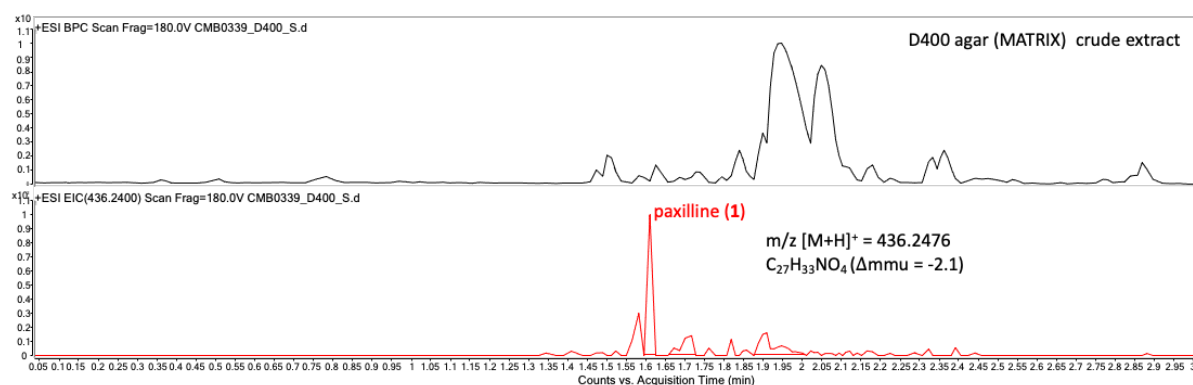

**Figure S71.** Single ion extraction of crude extract of CMB-M0339 grown on D400 agar (MATRIX) to show the presence of paxilline (1)

## 14 MS/MS fragmentation patterns of 5 - 9 and i-v

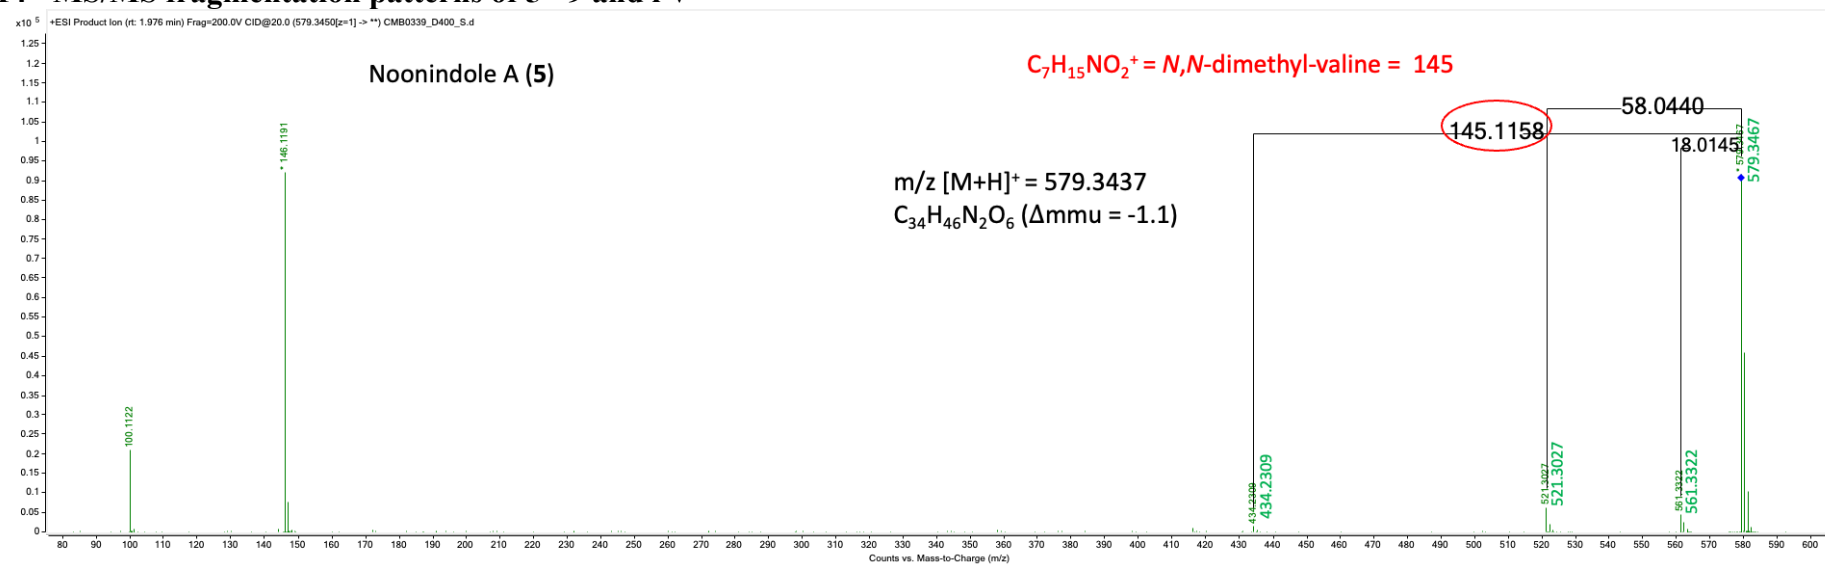

**Figure S72.** MS/MS fragmentation pattern of (5)



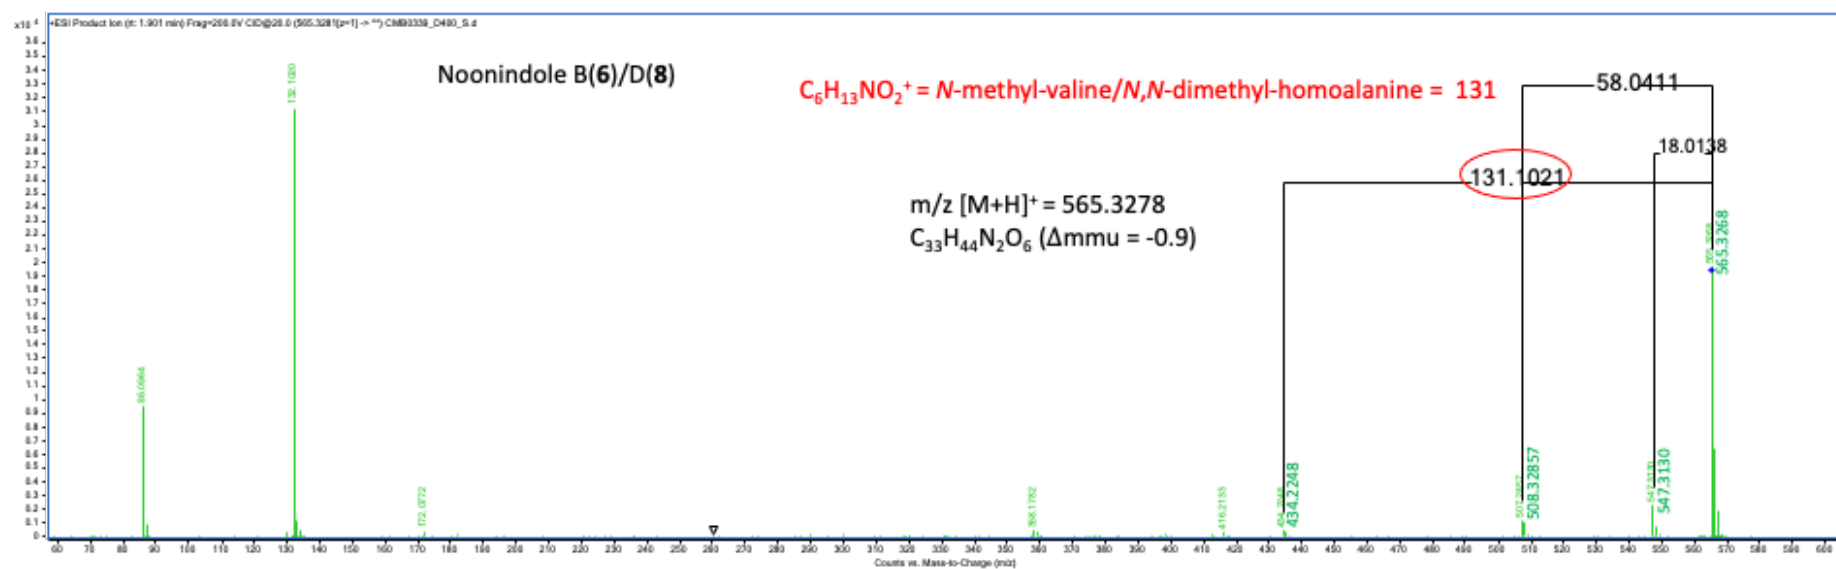

Figure S73. MS/MS fragmentation pattern of (6)/(8)

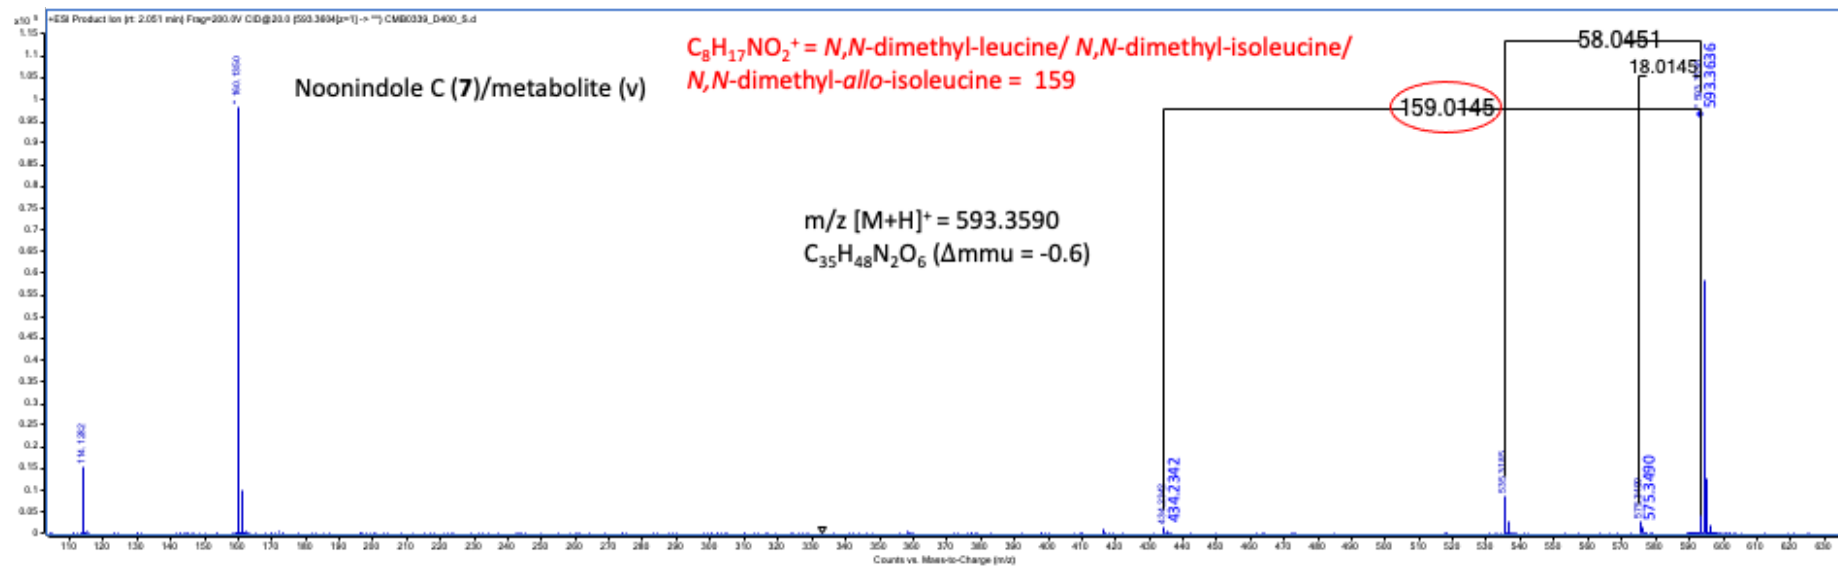

Figure S74. MS/MS fragmentation pattern of (7)/v

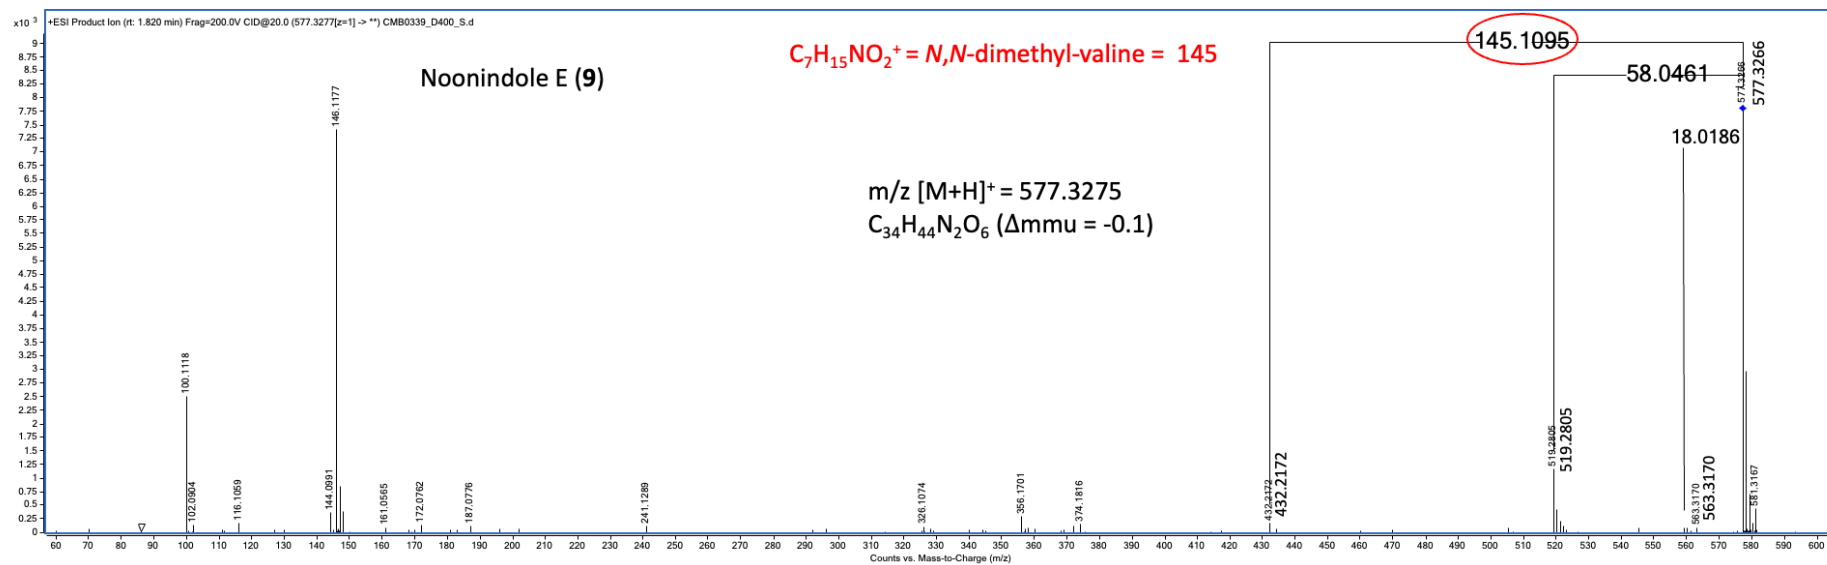

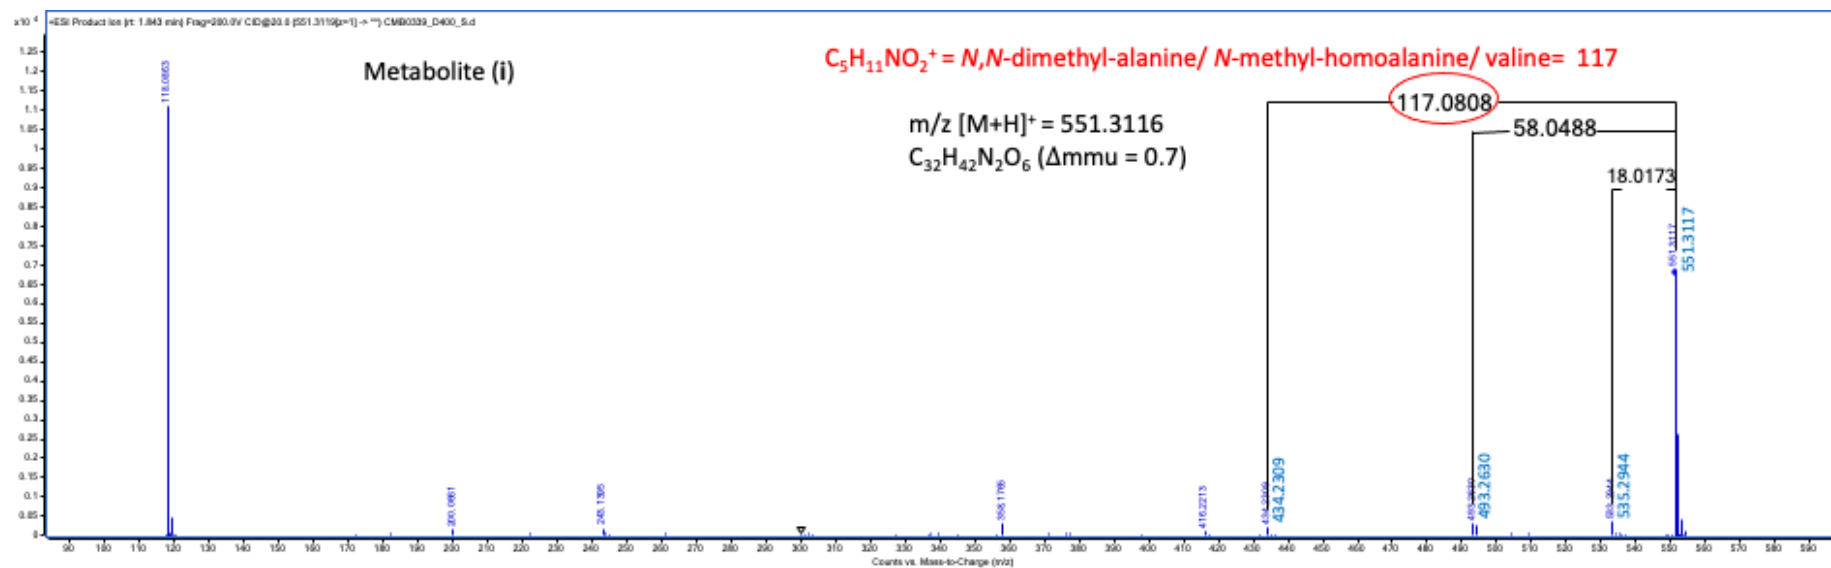

Figure S76. MS/MS fragmentation pattern of i

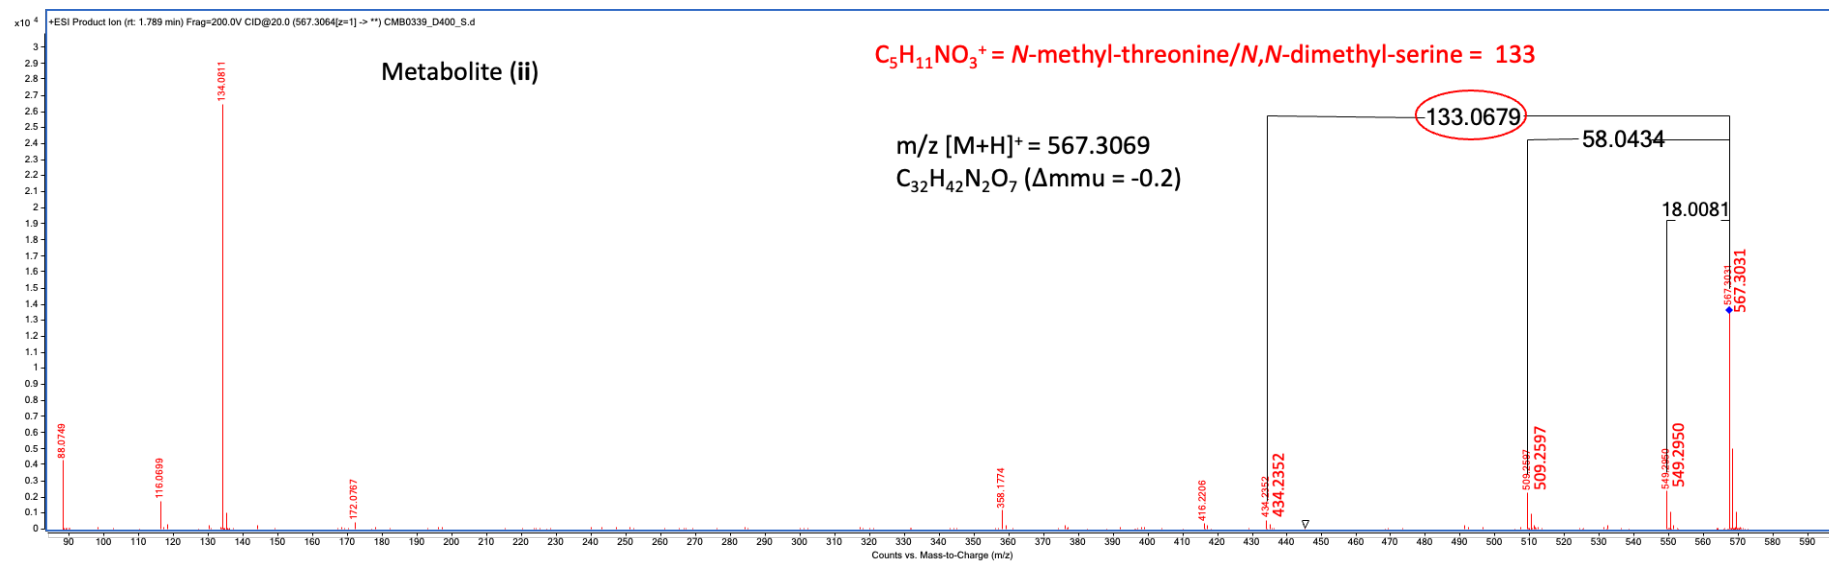

**Figure S77.** MS/MS fragmentation pattern of ii

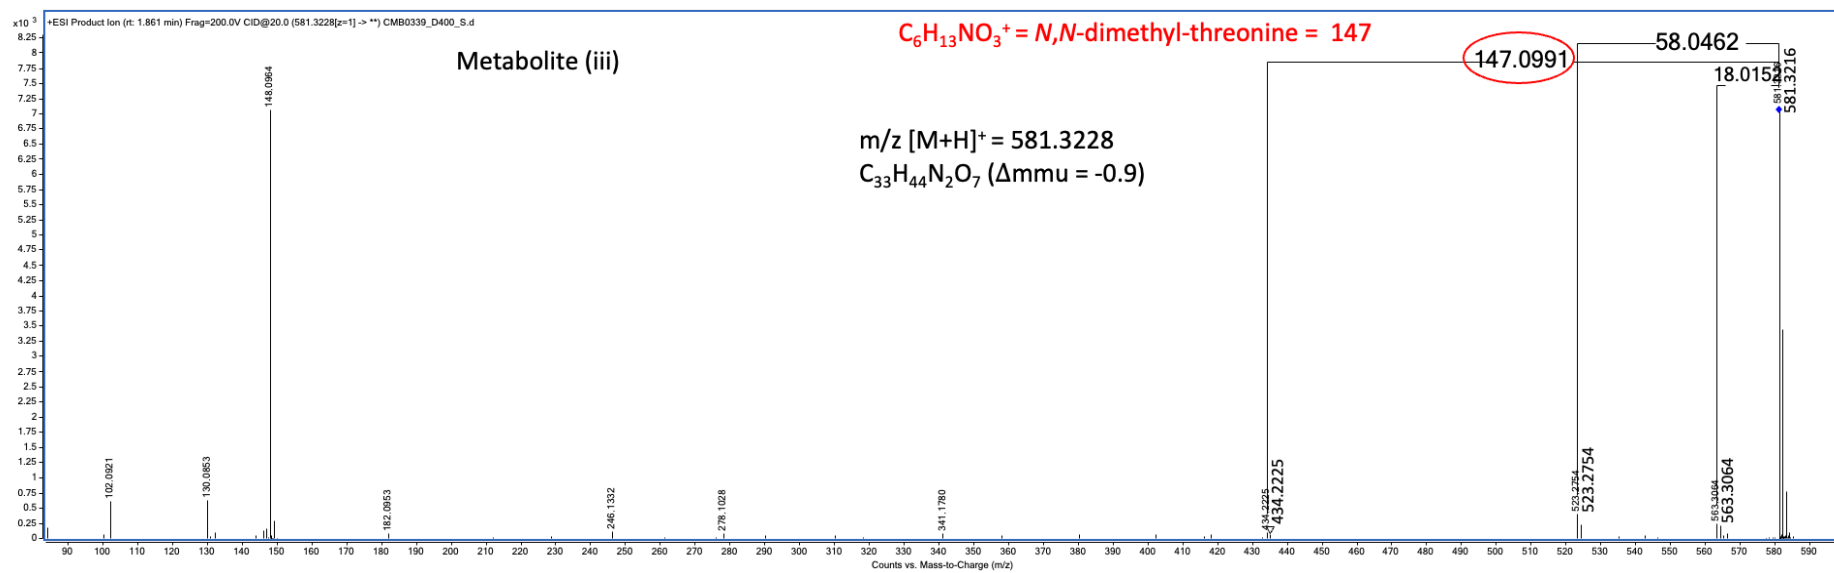

Figure S78. MS/MS fragmentation pattern of iii

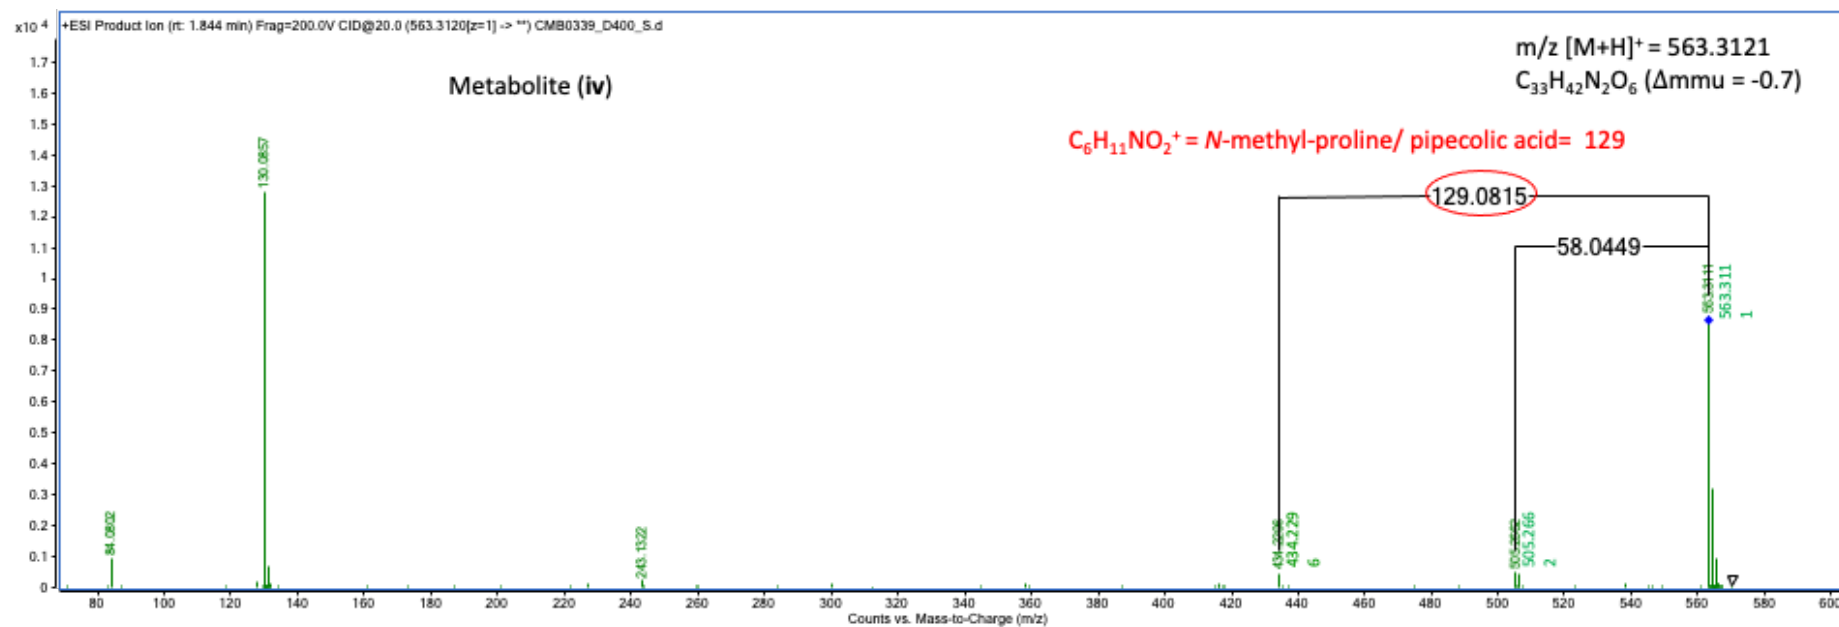

Figure S79. MS/MS fragmentation pattern of iv

**Table S12.** Molecular formulas generated for noonindoles A (5) -E (9) and predicted molecular formulas for minor metabolites (i) – (viii) observed in GNPS cluster

| Metabolites             |                                               | HRESI<br>m/z [M+H] <sup>+</sup> | HRESI<br>MW | Predicted MF                                                  | ΔmDa |
|-------------------------|-----------------------------------------------|---------------------------------|-------------|---------------------------------------------------------------|------|
| Isolated<br>metabolites | Minor metabolites detected<br>in GNPS cluster |                                 |             |                                                               |      |
| (5)                     |                                               | 579.3437                        | 578.3363    | C <sub>34</sub> H <sub>46</sub> N <sub>2</sub> O <sub>6</sub> | -1.1 |
| (6)/(8)                 |                                               | 565.3278                        | 564.3205    | C <sub>33</sub> H <sub>44</sub> N <sub>2</sub> O <sub>6</sub> | -0.9 |
| (7)                     |                                               | 593.3590                        | 592.3516    | C <sub>35</sub> H <sub>48</sub> N <sub>2</sub> O <sub>6</sub> | -0.6 |
| (9)                     |                                               | 577.3275                        | 576.3200    | C <sub>34</sub> H <sub>44</sub> N <sub>2</sub> O <sub>6</sub> | -0.1 |
|                         | (i)                                           | 551.3116                        | 550.3051    | C <sub>32</sub> H <sub>42</sub> N <sub>2</sub> O <sub>6</sub> | 0.7  |
|                         | (ii)                                          | 567.3069                        | 566.2993    | C <sub>32</sub> H <sub>42</sub> N <sub>2</sub> O <sub>7</sub> | -0.2 |
|                         | (iii)                                         | 581.3228                        | 580.3154    | C <sub>33</sub> H <sub>44</sub> N <sub>2</sub> O <sub>7</sub> | -0.9 |
|                         | (iv)                                          | 563.3121                        | 562.3052    | C <sub>33</sub> H <sub>42</sub> N <sub>2</sub> O <sub>6</sub> | -0.7 |
|                         | (v)                                           | 593.3590                        | 592.3516    | C <sub>35</sub> H <sub>48</sub> N <sub>2</sub> O <sub>6</sub> | -0.6 |
|                         | (vi)                                          | 609.3545                        | 608.3472    | C <sub>35</sub> H <sub>48</sub> N <sub>2</sub> O <sub>7</sub> | -1.7 |
|                         | (vii)                                         | 591.3434                        | 590.3362    | C <sub>35</sub> H <sub>46</sub> N <sub>2</sub> O <sub>6</sub> | -0.9 |
|                         | (viii)                                        | 595.3383                        | 594.3309    | C <sub>34</sub> H <sub>46</sub> N <sub>2</sub> O <sub>7</sub> | -0.6 |

## 15 Crystal data and structure refinement for noonindole A (5).

|                                 |                                                                                                 |          |
|---------------------------------|-------------------------------------------------------------------------------------------------|----------|
| Identification code             | 2100_0339_p12                                                                                   |          |
| Empirical formula               | C <sub>36</sub> H <sub>46</sub> F <sub>3</sub> N <sub>2</sub> O <sub>8</sub> .3H <sub>2</sub> O |          |
| Formula weight                  | 746.80                                                                                          |          |
| Temperature                     | 190(2) K                                                                                        |          |
| Wavelength                      | 1.54184 Å                                                                                       |          |
| Crystal system                  | Orthorhombic                                                                                    |          |
| Space group                     | <i>P</i> 2 <sub>1</sub> 2 <sub>1</sub> 2 <sub>1</sub>                                           |          |
| Unit cell dimensions            | a = 11.0176(2) Å                                                                                | α = 90°. |
|                                 | b = 19.8910(3) Å                                                                                | β = 90°. |
|                                 | c = 20.5726(2) Å                                                                                | γ = 90°. |
| Volume                          | 4508.51(12) Å <sup>3</sup>                                                                      |          |
| Z                               | 4                                                                                               |          |
| Density (calculated)            | 1.100 Mg/m <sup>3</sup>                                                                         |          |
| Absorption coefficient          | 0.750 mm <sup>-1</sup>                                                                          |          |
| F(000)                          | 1592                                                                                            |          |
| Crystal size                    | 0.200 x 0.200 x 0.200 mm <sup>3</sup>                                                           |          |
| Theta range for data collection | 4.298 to 61.601°.                                                                               |          |
| Index ranges                    | -12 ≤ h ≤ 12, -22 ≤ k ≤ 22, -23 ≤ l ≤ 16                                                        |          |
| Reflections collected           | 6976                                                                                            |          |
| Independent reflections         | 6976 [R(int) = 0.0399]                                                                          |          |
| Completeness to theta = 61.602° | 99.7 %                                                                                          |          |
| Refinement method               | Full-matrix least-squares on F <sup>2</sup>                                                     |          |
| Data / restraints / parameters  | 6976 / 6 / 475                                                                                  |          |



|                                      |                                       |
|--------------------------------------|---------------------------------------|
| Goodness-of-fit on $F^2$             | 1.056                                 |
| Final R indices [ $I > 2\sigma(I)$ ] | $R1 = 0.0332$ , $wR2 = 0.0845$        |
| R indices (all data)                 | $R1 = 0.0365$ , $wR2 = 0.0863$        |
| Absolute structure parameter         | -0.06(8)                              |
| Extinction coefficient               | n/a                                   |
| Largest diff. peak and hole          | 0.112 and -0.145 e. $\text{\AA}^{-3}$ |

**Table S13.** Bond lengths [ $\text{\AA}$ ] and angles [ $^\circ$ ] for X-ray crystal structure of noonindole A (**5**)

|             |          |             |          |
|-------------|----------|-------------|----------|
| C(1)-C(2)   | 1.379(3) | C(19)-C(20) | 1.340(3) |
| C(1)-C(6)   | 1.392(3) | C(20)-C(21) | 1.458(3) |
| C(2)-C(3)   | 1.396(4) | C(21)-O(2)  | 1.223(3) |
| C(3)-C(4)   | 1.378(3) | C(21)-C(22) | 1.508(4) |
| C(4)-C(5)   | 1.399(3) | C(22)-O(1)  | 1.423(3) |
| C(5)-C(6)   | 1.427(3) | C(22)-C(23) | 1.552(4) |
| C(5)-C(7)   | 1.427(3) | C(23)-O(5)  | 1.430(4) |
| C(6)-N(1)   | 1.382(3) | C(23)-C(24) | 1.503(7) |
| C(7)-C(11)  | 1.363(3) | C(23)-C(25) | 1.517(6) |
| C(7)-C(8)   | 1.508(3) | C(26)-O(4)  | 1.199(3) |
| C(8)-C(9)   | 1.548(3) | C(26)-O(3)  | 1.341(3) |
| C(9)-C(12)  | 1.511(3) | C(26)-C(27) | 1.512(3) |
| C(9)-C(10)  | 1.565(3) | C(27)-N(2)  | 1.502(3) |
| C(10)-C(11) | 1.512(3) | C(27)-C(28) | 1.550(3) |
| C(10)-C(33) | 1.542(3) | C(28)-C(30) | 1.517(4) |
| C(10)-C(15) | 1.562(3) | C(28)-C(29) | 1.519(4) |
| C(11)-N(1)  | 1.376(3) | C(32)-N(2)  | 1.492(3) |

|                   |            |                   |            |
|-------------------|------------|-------------------|------------|
| C(12)-C(13)       | 1.524(3)   | C(35)-O(8)        | 1.215(3)   |
| C(13)-O(3)        | 1.466(2)   | C(35)-O(7)        | 1.238(3)   |
| C(13)-C(14)       | 1.530(3)   | C(35)-C(36)       | 1.507(6)   |
| C(14)-O(6)        | 1.428(3)   | C(36)-F(3)        | 1.318(4)   |
| C(14)-C(19)       | 1.526(3)   | C(36)-F(1)        | 1.319(4)   |
| C(14)-C(15)       | 1.589(3)   | C(36)-F(2')       | 1.320(4)   |
| C(15)-C(34)       | 1.537(3)   | C(36)-F(1')       | 1.320(4)   |
| C(15)-C(16)       | 1.539(3)   | C(36)-F(2)        | 1.325(4)   |
| C(16)-C(17)       | 1.543(3)   | C(36)-F(3')       | 1.326(4)   |
| C(17)-C(18)       | 1.535(3)   | N(2)-C(31)        | 1.502(3)   |
| C(18)-O(1)        | 1.435(3)   | C(16)-C(15)-C(10) | 112.06(16) |
| C(18)-C(19)       | 1.509(3)   | C(34)-C(15)-C(14) | 110.28(16) |
| C(2)-C(1)-C(6)    | 117.5(2)   | C(16)-C(15)-C(14) | 106.00(17) |
| C(1)-C(2)-C(3)    | 121.7(2)   | C(10)-C(15)-C(14) | 110.05(16) |
| C(4)-C(3)-C(2)    | 121.2(2)   | C(15)-C(16)-C(17) | 112.10(18) |
| C(3)-C(4)-C(5)    | 119.0(2)   | C(18)-C(17)-C(16) | 114.0(2)   |
| C(4)-C(5)-C(6)    | 118.78(19) | O(1)-C(18)-C(19)  | 111.4(2)   |
| C(4)-C(5)-C(7)    | 136.0(2)   | O(1)-C(18)-C(17)  | 103.41(19) |
| C(6)-C(5)-C(7)    | 105.17(18) | C(19)-C(18)-C(17) | 112.64(19) |
| N(1)-C(6)-C(1)    | 129.4(2)   | C(20)-C(19)-C(18) | 119.72(19) |
| N(1)-C(6)-C(5)    | 108.79(17) | C(20)-C(19)-C(14) | 125.7(2)   |
| C(1)-C(6)-C(5)    | 121.81(19) | C(18)-C(19)-C(14) | 114.48(18) |
| C(11)-C(7)-C(5)   | 108.14(19) | C(19)-C(20)-C(21) | 121.4(2)   |
| C(11)-C(7)-C(8)   | 111.31(18) | O(2)-C(21)-C(20)  | 121.0(3)   |
| C(5)-C(7)-C(8)    | 140.3(2)   | O(2)-C(21)-C(22)  | 121.6(2)   |
| C(7)-C(8)-C(9)    | 98.48(17)  | C(20)-C(21)-C(22) | 117.3(2)   |
| C(12)-C(9)-C(8)   | 121.56(18) | O(1)-C(22)-C(21)  | 110.4(2)   |
| C(12)-C(9)-C(10)  | 111.31(18) | O(1)-C(22)-C(23)  | 107.0(2)   |
| C(8)-C(9)-C(10)   | 106.60(16) | C(21)-C(22)-C(23) | 113.4(3)   |
| C(11)-C(10)-C(33) | 106.18(15) | O(5)-C(23)-C(24)  | 109.8(3)   |
| C(11)-C(10)-C(15) | 119.45(17) | O(5)-C(23)-C(25)  | 107.4(3)   |
| C(33)-C(10)-C(15) | 113.48(18) | C(24)-C(23)-C(25) | 111.4(4)   |
| C(11)-C(10)-C(9)  | 96.36(16)  | O(5)-C(23)-C(22)  | 107.8(3)   |
| C(33)-C(10)-C(9)  | 111.32(17) | C(24)-C(23)-C(22) | 110.9(3)   |
| C(15)-C(10)-C(9)  | 108.78(15) | C(25)-C(23)-C(22) | 109.4(3)   |
| C(7)-C(11)-N(1)   | 110.21(17) | O(4)-C(26)-O(3)   | 124.3(2)   |
| C(7)-C(11)-C(10)  | 112.63(18) | O(4)-C(26)-C(27)  | 123.4(2)   |
| N(1)-C(11)-C(10)  | 135.9(2)   | O(3)-C(26)-C(27)  | 112.2(2)   |

|                   |            |                   |            |
|-------------------|------------|-------------------|------------|
| C(9)-C(12)-C(13)  | 105.98(17) | N(2)-C(27)-C(26)  | 110.95(19) |
| O(3)-C(13)-C(12)  | 107.95(16) | N(2)-C(27)-C(28)  | 113.1(2)   |
| O(3)-C(13)-C(14)  | 106.76(16) | C(26)-C(27)-C(28) | 110.63(17) |
| C(12)-C(13)-C(14) | 114.24(17) | C(30)-C(28)-C(29) | 111.1(2)   |
| O(6)-C(14)-C(19)  | 106.77(17) | C(30)-C(28)-C(27) | 114.7(2)   |
| O(6)-C(14)-C(13)  | 109.50(16) | C(29)-C(28)-C(27) | 110.1(2)   |
| C(19)-C(14)-C(13) | 113.66(16) | O(8)-C(35)-O(7)   | 127.7(3)   |
| O(6)-C(14)-C(15)  | 107.63(15) | O(8)-C(35)-C(36)  | 115.2(3)   |
| C(19)-C(14)-C(15) | 106.78(16) | O(7)-C(35)-C(36)  | 116.9(2)   |
| C(13)-C(14)-C(15) | 112.20(16) | F(3)-C(36)-F(1)   | 109.6(9)   |
| C(34)-C(15)-C(16) | 108.71(18) |                   |            |
| C(34)-C(15)-C(10) | 109.67(17) |                   |            |
| F(2')-C(36)-F(1') | 99.9(9)    |                   |            |
| F(3)-C(36)-F(2)   | 111.6(13)  |                   |            |
| F(1)-C(36)-F(2)   | 101.3(10)  |                   |            |
| F(2')-C(36)-F(3') | 110.5(13)  |                   |            |
| F(1')-C(36)-F(3') | 116.4(13)  |                   |            |
| F(3)-C(36)-C(35)  | 114.0(6)   |                   |            |
| F(1)-C(36)-C(35)  | 116.8(6)   |                   |            |
| F(2')-C(36)-C(35) | 111.4(5)   |                   |            |
| F(1')-C(36)-C(35) | 108.8(7)   |                   |            |
| F(2)-C(36)-C(35)  | 102.5(8)   |                   |            |
| F(3')-C(36)-C(35) | 109.5(8)   |                   |            |
| C(11)-N(1)-C(6)   | 107.67(17) |                   |            |
| C(32)-N(2)-C(31)  | 108.6(2)   |                   |            |
| C(32)-N(2)-C(27)  | 111.9(2)   |                   |            |
| C(31)-N(2)-C(27)  | 111.8(2)   |                   |            |
| C(22)-O(1)-C(18)  | 115.32(18) |                   |            |
| C(26)-O(3)-C(13)  | 116.59(17) |                   |            |

## 16 Biological activity of 5-14

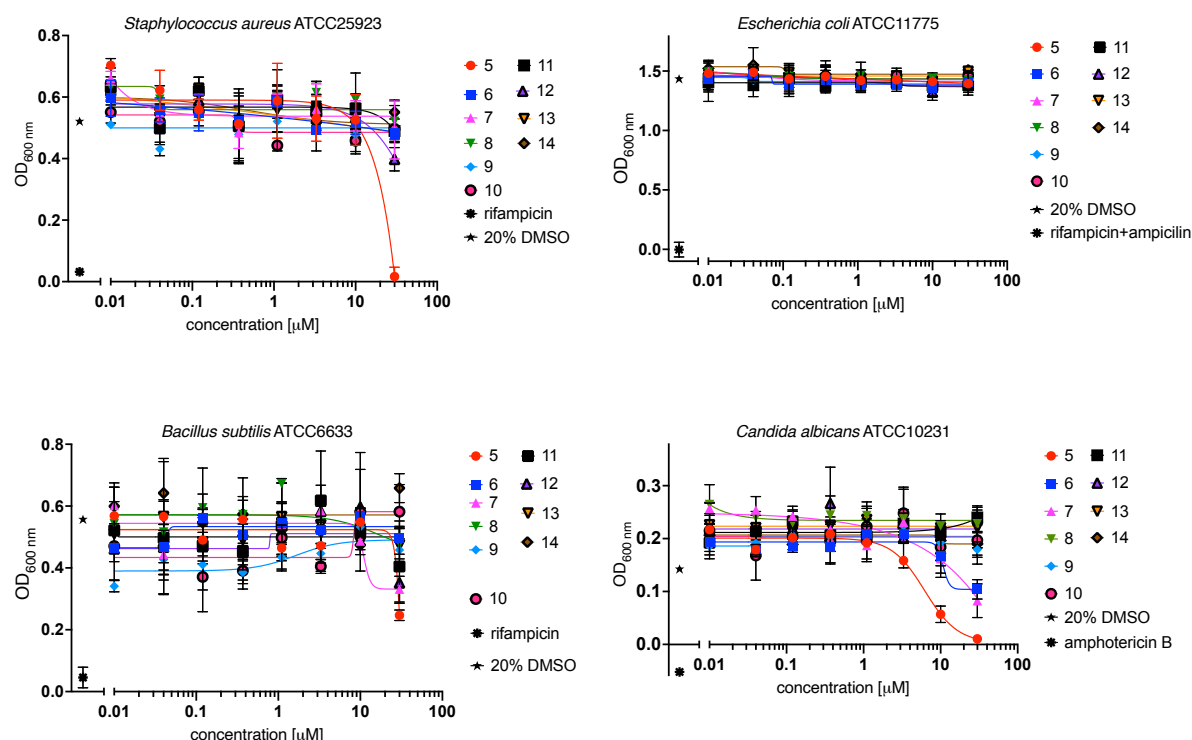

**Figure S80.** Antimicrobial activity of metabolites 5–14 against *S. aureus*, *E. coli*, *B. subtilis* and *C. albicans*

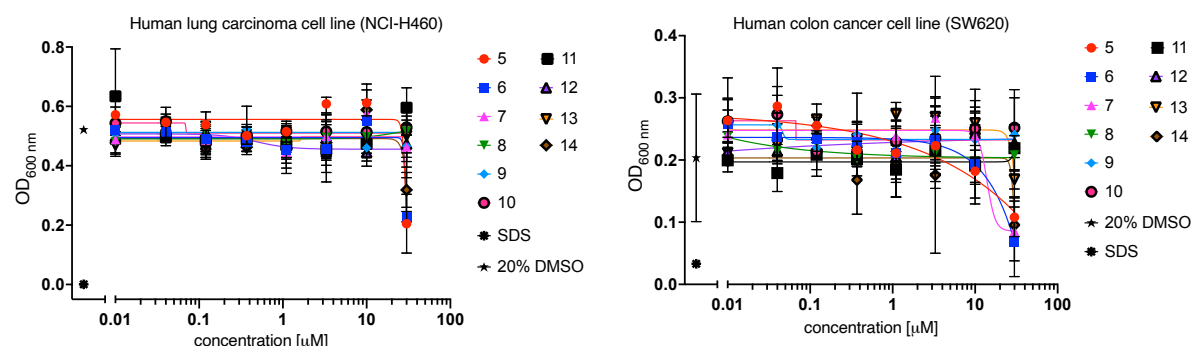

**Figure S81.** Cytotoxicity of metabolites 5–14 against human colon cancer (SW620) and human lung carcinoma (NCI-H460) cell lines

## 17 References

1. Fan, Y.; Wang, Y.; Liu, P.; Fu, P.; Zhu, T.; Wang, W.; Zhu, W. Indole-diterpenoids with Anti-H1N1 Activity from the Aceduric Fungus *Penicillium camemberti* OUCMDZ-1492. *J. Nat. Prod.* **2013**, *76*, 1328-1336.
2. Munday-Finch, S. C.; Wilkins, A. L.; Miles, C. O. Isolation of paspaline B, an indole-diterpenoid from *Penicillium paxilli*. *Phytochemistry* **1996**, *41*, 327-332.
